# Supplementary material for: Isolation and sequence-based characterization of a koala symbiont: Lonepinella koalarum
Source: PeerJ. 2020 Oct 20;8:e10177. doi: 10.7717/peerj.10177 (PMC7583611; doi:10.7717/peerj.10177)
Supplement: Supplemental Information 5 — NCBI taxonomies, NCBI accession numbers, GTDB taxonomies, and shortened names for the comparative genomic analysis are tabulated. [file peerj-08-10177-s005.xlsx]

## Sheet: Sheet1
NCBI Taxonomy	Name in Anvi'o	NCBI accession	GTDB Tax
Actinobacillus succinogenes 130Z	ActSuc_000017245	GCA_000017245.1	Basfia succinogenes
Aggregatibacter actinomycetemcomitans DSM 8324	AggAct_000372365	GCA_000372365.1	same
Aggregatibacter aphrophilus ATCC 33389	AggAph_000226495	GCA_000226495.1	same
Aggregatibacter segnis ATCC 33393	AggSeg_000185305	GCA_000185305.1	same
Aggregatibacter sp. oral taxon 458 str. W10330	AggS_000466335	GCA_000466335.1	same
Avibacterium paragallinarum strain AVPG2015	AviPar_000969315	GCA_000969315.1	same
Haemophilus aegyptius ATCC 11116	HaeAeg_000195005	GCA_000195005.1	same
Haemophilus felis strain CCUG 31170	HaeFel_002015125	GCA_002015125.1	same
Haemophilus haemoglobinophilus strain CCUG 3714	HaeHae8_002015075	GCA_002015075.1	Histophilus haemoglobinophilus
Haemophilus haemolyticus HK386	HaeHae9_000262285	GCA_000262285.1	same
Haemophilus haemolyticus M19501 M19501_022	HaeHae1_000222025	GCA_000222025.1	same
Haemophilus haemolyticus M21127 M21127_038	HaeHae2_000222045	GCA_000222045.1	same
Haemophilus haemolyticus strain 11P18	HaeHae3_001008205	GCA_001008205.1	same
Haemophilus haemolyticus strain 1P26	HaeHae4_001008215	GCA_001008215.1	same
Haemophilus haemolyticus strain 27P25	HaeHae6_001008275	GCA_001008275.1	same
Haemophilus haemolyticus strain 3P5	HaeHae5_001008225	GCA_001008225.1	same
Haemophilus haemolyticus strain CCUG 24149	HaeHae7_001679135	GCA_001679135.1	same
Haemophilus influenzae Rd KW20	HaeInf1_000027305	GCA_000027305.1	same
Haemophilus influenzae strain 841	HaeInf4_001058575	GCA_001058575.1	Haemophilus parainfluenzae
Haemophilus influenzae strain Hi375	HaeInf2_000767075	GCA_000767075.1	same
Haemophilus influenzae strain hi467	HaeInf3_001975845	GCA_001975845.1	same
Haemophilus parainfluenzae ATCC 33392	HaePar1_000191405	GCA_000191405.1	same
Haemophilus parainfluenzae T3T1	HaePar2_000210895	GCA_000210895.1	same
Haemophilus pittmaniae HK 85 ctg1129913985426	HaePit_000223275	GCA_000223275.1	same
Haemophilus quentini strain K068	HaeQue_001752465	GCA_001752465.1	same
Haemophilus somnus 2336	HaeSom_000019405	GCA_000019405.1	same
Haemophilus sp. C1 contig398	HaeS2_001276515	GCA_001276515.1	same
Haemophilus sp. CCUG 60358	HaeS3_001679485	GCA_001679485.1	same
Haemophilus sp. CCUG 66565	HaeS4_001679495	GCA_001679495.1	same
Haemophilus sp. FF7	HaeS8_000752995	GCA_000752995.1	same
Haemophilus sp. HMSC061E01	HaeS5_001810345	GCA_001810345.1	Haemophilus parainfluenzae
Haemophilus sp. HMSC066D03	HaeS6_001811025	GCA_001811025.1	Haemophilus parainfluenzae
Haemophilus sp. HMSC073C03	HaeS7_001814055	GCA_001814055.1	Haemophilus parainfluenzae
Haemophilus sp. oral taxon 851 str. F0397	HaeS1_000242295	GCA_000242295.1	Haemophilus haemolyticus
Lonepinella koalarum strain ATCC 700131	ATCC700131	GCA_004565475.1	NA
Lonepinella koalarum strain DSM 10053	DSM10053	GCA_004339625.1	NA
Mannheimia succiniciproducens MBEL55E	ManSuc_000007745	GCA_000007745.1	Basfia succinogenes
Necropsobacter massiliensis strain FF6	NecMas_000827595	GCA_000827595.1	same
Necropsobacter rosorum	NecRos_000751835	GCA_000751835.1	same
Pasteurella bettyae CCUG 2042	PasPne_000262245	GCA_000262245.1	Basfia bettyae
Pasteurella dagmatis ATCC 43325	PasDag_000163475	GCA_000163475.1	same
Pasteurella multocida strain 306	PasMul3_001064415	GCA_001064415.1	Pasteurella canis
Pasteurella multocida strain ATCC 43137	PasMul1_000754275	GCA_000754275.1	same
Pasteurella multocida subsp. multocida OH4807	PasMul2_000973525	GCA_000973525.1	same
Rodentibacter pneumotropica	PasPne2_001019715	GCA_001019715.1	same
Rodentibacter pneumotropica DSM 21403	PasPne1_000379905	GCA_000379905.1	same
Rodentibacter genomosp. 1 strain ppn416	RodGen1_001999285	GCA_001999285.1	same
Rodentibacter genomosp. 2 strain 1996246016	RodGen3_002000435	GCA_002000435.1	Rodentibacter mrazii
Rodentibacter genomosp. 2 strain ppn422	RodGen2_001999425	GCA_001999425.1	same
Rodentibacter heidelbergensis strain Ac69	RodHei_002000125	GCA_002000125.1	same
Rodentibacter heylii strain 1998236014	RodHey_001998905	GCA_001998905.1	same
Rodentibacter mrazii strain ppn418	RodMra_001998825	GCA_001998825.1	same
Rodentibacter myodis strain Ac151	RodMyo_001999305	GCA_001999305.1	same
Rodentibacter rarus strain 2005150027	RodRar_002000405	GCA_002000405.1	same
Rodentibacter ratti strain F75	RodRat2_002000485	GCA_002000485.1	same
Rodentibacter ratti strain H1983213011	RodRat1_002000425	GCA_002000425.1	Rodentibacter trehalosifermentans
Rodentibacter sp. Ppn85	RodS_001999335	GCA_001999335.1	same
