# Supplementary material for: Isolation and sequence-based characterization of a koala symbiont: Lonepinella koalarum
Source: PeerJ. 2020 Oct 20;8:e10177. doi: 10.7717/peerj.10177 (PMC7583611; doi:10.7717/peerj.10177)
Supplement: Supplemental Information 6 — All 88 hits for genes involved in xenobiotics biodegradation and metabolism KEGG orthology class 1.11 are shown, including eggNOG seed ortholog E-values of the search, seed ortholog scores, taxonomy of query hits, KEGG IDs, and putative functions. The first column contains gene names; i.e., eggNOG keys to link hits to their translated amino acid sequences on FigShare. [file peerj-08-10177-s006.xlsx]

## Sheet: Sheet1
Key for eggNOG	Query name	Seed ortholog E-value	Seed ortholog score	Best taxonomy level	Alternative name	GOs	EC	KEGG ko	KEGG Pathway	KEGG Module	KEGG Reaction	KEGG rclass	COG category	Function
471874.PROSTU_04141	1_295	3.7e-225	787.3	Providencia			4.3.2.2,5.5.1.2	ko:K01756,ko:K01857	ko00230,ko00250,ko00362,ko01100,ko01110,ko01120,ko01130,ko01220,map00230,map00250,map00362,map01100,map01110,map01120,map01130,map01220	M00048,M00049	R01083,R03307,R04559	RC00379,RC00444,RC00445,RC00902	F	adenylosuccinate lyase
1123499.KB908022_gene1119	1_1119	5.6e-139	500.7	Neisseriales	galD		5.3.2.8	ko:K16514	ko00362,ko01120,map00362,map01120		R07839	RC02426	S	AcnD-accessory protein PrpF
1123499.KB908022_gene1118	1_1120	8e-180	636.3	Neisseriales	ligJ		4.2.1.83	ko:K10220	ko00362,ko01120,map00362,map01120		R04478	RC00498	S	Amidohydrolase
1123367.C666_09825	1_1121	2.7e-86	325.1	Betaproteobacteria	ligK		4.1.3.17	ko:K10218	ko00362,ko00660,ko01120,map00362,map00660,map01120		R00008,R00350	RC00067,RC00502,RC01205	H	4-carboxy-4-hydroxy-2-oxoadipate aldolase oxaloacetate decarboxylase
1122619.KB892346_gene1408	1_1122	1e-146	526.2	Alcaligenaceae	ligI		3.1.1.57	ko:K10221	ko00362,ko00627,ko01120,map00362,map00627,map01120		R04277	RC03110	S	metal-dependent hydrolase of the TIM-barrel fold
1461579.CCNK01000039_gene1848	1_1417	5.3e-188	663.7	Pasteurellales			2.3.1.9	ko:K00626	ko00071,ko00072,ko00280,ko00310,ko00362,ko00380,ko00620,ko00630,ko00640,ko00650,ko00720,ko00900,ko01100,ko01110,ko01120,ko01130,ko01200,ko01212,ko02020,map00071,map00072,map00280,map00310,map00362,map00380,map00620,map00630,map00640,map00650,map00720,map00900,map01100,map01110,map01120,map01130,map01200,map01212,map02020	M00088,M00095,M00373,M00374,M00375	R00238,R01177	RC00004,RC00326	I	Acetyl-CoA acetyltransferase of cellular organisms UniRef RepID THIL_CUPNH
1461579.CCNK01000039_gene1857	1_1425	1.3e-165	589.3	Pasteurellales	atoB		1.1.1.88,2.3.1.9	ko:K00054,ko:K00626	ko00071,ko00072,ko00280,ko00310,ko00362,ko00380,ko00620,ko00630,ko00640,ko00650,ko00720,ko00900,ko01100,ko01110,ko01120,ko01130,ko01200,ko01212,ko02020,map00071,map00072,map00280,map00310,map00362,map00380,map00620,map00630,map00640,map00650,map00720,map00900,map01100,map01110,map01120,map01130,map01200,map01212,map02020	M00088,M00095,M00373,M00374,M00375	R00238,R01177,R02081	RC00004,RC00326,RC00644	I	Acetyl-CoA acetyltransferase of cellular organisms UniRef RepID THIL_CUPNH
1366050.N234_09400	1_1495	7.7e-13	79.3	Burkholderiaceae	dmpI		5.3.2.6	ko:K01821	ko00362,ko00621,ko00622,ko01100,ko01120,ko01220,map00362,map00621,map00622,map01100,map01120,map01220	M00569	R03966,R05389	RC01040,RC01355	G	4-oxalocrotonate tautomerase
1301098.PKB_3259	1_1496	1.4e-94	352.8	Gammaproteobacteria	mhpD		4.1.1.77,4.2.1.132,4.2.1.80	ko:K01617,ko:K02509,ko:K02554,ko:K18364	ko00350,ko00360,ko00362,ko00621,ko00622,ko01100,ko01120,ko01220,map00350,map00360,map00362,map00621,map00622,map01100,map01120,map01220	M00545,M00569	R02601,R02602,R04132,R04781,R05374,R05864,R06897	RC00750,RC00751,RC01213,RC01615,RC02595,RC02672,RC02676	Q	hydratase
1229205.BUPH_05359	1_1497	5.5e-96	357.5	Burkholderiaceae	amnE		4.1.1.77,4.2.1.80	ko:K01617,ko:K02509,ko:K02554	ko00350,ko00360,ko00362,ko00621,ko00622,ko01100,ko01120,ko01220,map00350,map00360,map00362,map00621,map00622,map01100,map01120,map01220	M00545,M00569	R02601,R02602,R04132,R04781,R05374,R06897	RC00750,RC00751,RC01213,RC01615,RC02595,RC02672	Q	4-oxalocrotonate decarboxylase
1006000.GKAS_01570	1_1498	1.8e-133	482.3	Gammaproteobacteria	mhpF	GO:0003674,GO:0003824,GO:0008150,GO:0008152,GO:0008774,GO:0016491,GO:0016620,GO:0016903,GO:0055114	1.2.1.10	ko:K04073	ko00360,ko00362,ko00620,ko00621,ko00622,ko00650,ko01100,ko01120,ko01220,map00360,map00362,map00620,map00621,map00622,map00650,map01100,map01120,map01220	M00545,M00569	R00228,R01172	RC00004,RC00184,RC01195	Q	Catalyzes the conversion of acetaldehyde to acetyl-CoA, using NAD( ) and coenzyme A. Is the final enzyme in the meta- cleavage pathway for the degradation of aromatic compounds
1217713.F993_01329	1_1499	9.7e-162	576.2	Moraxellaceae	mhpE	GO:0003674,GO:0003824,GO:0008701,GO:0016829,GO:0016830,GO:0016833	4.1.3.39	ko:K01666	ko00360,ko00362,ko00621,ko00622,ko01100,ko01120,ko01220,map00360,map00362,map00621,map00622,map01100,map01120,map01220	M00545,M00569	R00750	RC00307,RC00371	H	Catalyzes the retro-aldol cleavage of 4-hydroxy-2- oxopentanoate to pyruvate and acetaldehyde. Is involved in the meta-cleavage pathway for the degradation of aromatic compounds
383372.Rcas_2413	1_1505	7.1e-107	394	Chloroflexia			1.13.11.2	ko:K00446	ko00361,ko00362,ko00622,ko00643,ko01100,ko01120,ko01220,map00361,map00362,map00622,map00643,map01100,map01120,map01220	M00569	R00816,R04089,R05295,R05404,R05406,R07795	RC00387,RC00643,RC01075,RC01364,RC01914	E	PFAM Glyoxalase bleomycin resistance protein dioxygenase
1121090.KB894700_gene3299	1_1701	2.4e-151	542	Bacillus	bktB		2.3.1.9	ko:K00626	ko00071,ko00072,ko00280,ko00310,ko00362,ko00380,ko00620,ko00630,ko00640,ko00650,ko00720,ko00900,ko01100,ko01110,ko01120,ko01130,ko01200,ko01212,ko02020,map00071,map00072,map00280,map00310,map00362,map00380,map00620,map00630,map00640,map00650,map00720,map00900,map01100,map01110,map01120,map01130,map01200,map01212,map02020	M00088,M00095,M00373,M00374,M00375	R00238,R01177	RC00004,RC00326	I	Belongs to the thiolase family
546274.EIKCOROL_01331	1_486	3.5e-79	301.2	Neisseriales	ubiX	GO:0003674,GO:0003824,GO:0006732,GO:0008150,GO:0008152,GO:0009058,GO:0009108,GO:0009987,GO:0016829,GO:0016830,GO:0016831,GO:0044237,GO:0044249,GO:0051186,GO:0051188	2.5.1.129	ko:K03186	ko00130,ko00627,ko00940,ko01100,ko01110,ko01120,ko01220,map00130,map00627,map00940,map01100,map01110,map01120,map01220	M00117	R01238,R02952,R03367,R04985,R04986,R11225	RC00391,RC00814,RC03392	H	Flavin prenyltransferase that catalyzes the synthesis of the prenylated FMN cofactor (prenyl-FMN) for 4-hydroxy-3- polyprenylbenzoic acid decarboxylase UbiD. The prenyltransferase is metal-independent and links a dimethylallyl moiety from dimethylallyl monophosphate (DMAP) to the flavin N5 and C6 atoms of FMN
1122619.KB892346_gene1408	1_1122	1e-146	526.2	Alcaligenaceae	ligI		3.1.1.57	ko:K10221	ko00362,ko00627,ko01120,map00362,map00627,map01120		R04277	RC03110	S	metal-dependent hydrolase of the TIM-barrel fold
1461579.CCNK01000039_gene1847	1_1418	2.1e-98	365.2	Gammaproteobacteria	scoB		2.8.3.5,2.8.3.8,2.8.3.9	ko:K01027,ko:K01029,ko:K01035	ko00072,ko00280,ko00310,ko00627,ko00640,ko00650,ko01100,ko01120,ko02020,map00072,map00280,map00310,map00627,map00640,map00650,map01100,map01120,map02020		R00410,R01179,R01359,R01365,R07832	RC00012,RC00014	I	COG2057 Acyl CoA acetate 3-ketoacid CoA transferase, beta subunit
1461579.CCNK01000039_gene1846	1_1419	4.3e-102	377.5	Pasteurellales	atoD		2.8.3.8,2.8.3.9	ko:K01034	ko00310,ko00627,ko00640,ko00650,ko01100,ko01120,ko02020,map00310,map00627,map00640,map00650,map01100,map01120,map02020		R01179,R01359,R01365,R07832	RC00012,RC00014	I	Acetate CoA-transferase subunit alpha of Bacteria UniRef RepID ATOD_HAEIN
591023.AM202_04846	1_1562	8.9e-254	882.5	Pasteurellales	glnA	GO:0003674,GO:0003824,GO:0004356,GO:0005488,GO:0005515,GO:0005575,GO:0005622,GO:0005623,GO:0005737,GO:0005829,GO:0006082,GO:0006520,GO:0006536,GO:0006541,GO:0006542,GO:0006725,GO:0006807,GO:0008150,GO:0008152,GO:0008652,GO:0009058,GO:0009064,GO:0009084,GO:0009314,GO:0009628,GO:0009987,GO:0016053,GO:0016211,GO:0016853,GO:0016866,GO:0016874,GO:0016879,GO:0016880,GO:0019676,GO:0019740,GO:0019752,GO:…	5.4.4.3,6.3.1.2	ko:K01915,ko:K20712	ko00220,ko00250,ko00627,ko00630,ko00910,ko01100,ko01120,ko01230,ko02020,ko04217,ko04724,ko04727,map00220,map00250,map00627,map00630,map00910,map01100,map01120,map01230,map02020,map04217,map04724,map04727		R00253,R06988,R09284	RC00010,RC01754,RC02798	E	glutamine synthetase
339671.Asuc_1003	1_1998	6.9e-22	109.8	Pasteurellales	acyP	GO:0003674,GO:0003824,GO:0003998,GO:0016787,GO:0016817,GO:0016818	3.6.1.7	ko:K01512	ko00620,ko00627,ko01120,map00620,map00627,map01120		R00317,R01421,R01515	RC00043	C	acylphosphatase activity
1121859.KB890756_gene1438	1_1163	1.7e-109	402.5	Cytophagia	yghX		3.1.1.45	ko:K01061	ko00361,ko00364,ko00623,ko01100,ko01110,ko01120,ko01130,map00361,map00364,map00623,map01100,map01110,map01120,map01130		R03893,R05510,R05511,R06835,R06838,R08120,R08121,R09136,R09220,R09222	RC01018,RC01906,RC01907,RC02441,RC02467,RC02468,RC02674,RC02675,RC02686	Q	dienelactone hydrolase
339671.Asuc_0724	1_524	1.7e-66	258.8	Pasteurellales	tadA	GO:0002097,GO:0002100,GO:0006139,GO:0006382,GO:0006396,GO:0006399,GO:0006400,GO:0006725,GO:0006807,GO:0008033,GO:0008150,GO:0008152,GO:0009451,GO:0009987,GO:0010467,GO:0016070,GO:0016553,GO:0034470,GO:0034641,GO:0034660,GO:0043170,GO:0043412,GO:0044237,GO:0044238,GO:0046483,GO:0071704,GO:0090304,GO:1901360	3.4.17.13,3.5.4.1,3.5.4.3,3.5.4.33,3.8.1.5	ko:K01297,ko:K01485,ko:K01487,ko:K01563,ko:K11991	ko00230,ko00240,ko00330,ko00361,ko00625,ko01100,ko01120,map00230,map00240,map00330,map00361,map00625,map01100,map01120		R00974,R01411,R01676,R02922,R05284,R05367,R05368,R05369,R05370,R07669,R07670,R10223	RC00074,RC00204,RC00477,RC00514,RC00809,RC01317,RC01340,RC01341,RC02013	FJ	Catalyzes the deamination of adenosine to inosine at the wobble position 34 of tRNA(Arg2)
1121024.AUCD01000013_gene145	1_748	8e-90	337.4	Carnobacteriaceae	gldA	GO:0003674,GO:0003824,GO:0005488,GO:0005515,GO:0008150,GO:0008152,GO:0016491,GO:0016614,GO:0016616,GO:0042802,GO:0047545,GO:0055114	1.1.1.1,1.1.1.6	ko:K00001,ko:K00005,ko:K08317	ko00010,ko00071,ko00350,ko00561,ko00625,ko00626,ko00640,ko00830,ko00980,ko00982,ko01100,ko01110,ko01120,ko01130,ko01220,map00010,map00071,map00350,map00561,map00625,map00626,map00640,map00830,map00980,map00982,map01100,map01110,map01120,map01130,map01220		R00623,R00754,R01034,R02124,R04805,R04880,R05233,R05234,R06917,R06927,R07105,R08281,R08306,R08310,R10715,R10717	RC00029,RC00050,RC00087,RC00088,RC00099,RC00116,RC00117,RC00649,RC00670,RC01734,RC02273	C	Iron-containing alcohol dehydrogenase
339671.Asuc_0159	1_806	6.9e-144	516.9	Pasteurellales	yjjN	GO:0003674,GO:0003824,GO:0005975,GO:0006082,GO:0008150,GO:0008152,GO:0009056,GO:0009987,GO:0016052,GO:0016054,GO:0016491,GO:0016614,GO:0016616,GO:0019520,GO:0019583,GO:0019584,GO:0019752,GO:0032787,GO:0034193,GO:0034195,GO:0043436,GO:0044237,GO:0044238,GO:0044248,GO:0044262,GO:0044275,GO:0044281,GO:0044282,GO:0046176,GO:0046395,GO:0055114,GO:0071704,GO:0072329,GO:1901575	1.1.1.1,1.1.1.58	ko:K00001,ko:K00041	ko00010,ko00040,ko00071,ko00350,ko00625,ko00626,ko00830,ko00980,ko00982,ko01100,ko01110,ko01120,ko01130,ko01220,map00010,map00040,map00071,map00350,map00625,map00626,map00830,map00980,map00982,map01100,map01110,map01120,map01130,map01220	M00631	R00623,R00754,R02124,R02555,R04805,R04880,R05233,R05234,R06917,R06927,R07105,R08281,R08306,R08310	RC00050,RC00085,RC00087,RC00088,RC00099,RC00116,RC00649,RC01734,RC02273	E	Zinc-binding dehydrogenase
221988.MS2325	1_870	1.9e-182	645.2	Pasteurellales	fucO		1.1.1.1,1.1.1.77,1.1.99.37,1.2.98.1	ko:K00048,ko:K13954,ko:K17067	ko00010,ko00071,ko00350,ko00625,ko00626,ko00630,ko00640,ko00680,ko01100,ko01110,ko01120,ko01130,ko01200,ko01220,map00010,map00071,map00350,map00625,map00626,map00630,map00640,map00680,map01100,map01110,map01120,map01130,map01200,map01220		R00614,R00623,R00754,R01781,R02257,R04880,R05233,R05234,R06917,R06927	RC00034,RC00050,RC00087,RC00088,RC00099,RC00116,RC00188,RC00649	C	Lactaldehyde reductase of Bacteria UniRef RepID A6LQL3_CLOB8
1006004.GBAG_0965	1_1168	3.4e-149	534.6	Gammaproteobacteria	adhC2		1.1.1.1	ko:K13953,ko:K13979	ko00010,ko00071,ko00350,ko00625,ko00626,ko00830,ko00980,ko00982,ko01100,ko01110,ko01120,ko01130,ko01220,map00010,map00071,map00350,map00625,map00626,map00830,map00980,map00982,map01100,map01110,map01120,map01130,map01220		R00623,R00754,R02124,R04880,R05233,R05234,R06917,R06927,R07105,R08281,R08306,R08310	RC00050,RC00087,RC00088,RC00099,RC00116,RC00649,RC01734,RC02273	S	alcohol dehydrogenase
641147.HMPREF9021_00672	1_1172	9.9e-200	702.6	Neisseriales	adhC		1.1.1.1,1.1.1.284	ko:K00121	ko00010,ko00071,ko00350,ko00625,ko00626,ko00680,ko00830,ko00980,ko00982,ko01100,ko01110,ko01120,ko01130,ko01200,ko01220,ko05204,map00010,map00071,map00350,map00625,map00626,map00680,map00830,map00980,map00982,map01100,map01110,map01120,map01130,map01200,map01220,map05204		R00623,R00754,R02124,R04880,R05233,R05234,R06917,R06927,R06983,R07105,R08281,R08306,R08310	RC00050,RC00087,RC00088,RC00099,RC00116,RC00649,RC01715,RC01734,RC02273	C	Belongs to the zinc-containing alcohol dehydrogenase family. Class-III subfamily
416269.APL_1011	1_1184	0	1562	Pasteurellales	adhE		1.1.1.1,1.2.1.10	ko:K04072	ko00010,ko00071,ko00350,ko00620,ko00625,ko00626,ko00650,ko01100,ko01110,ko01120,ko01130,ko01220,map00010,map00071,map00350,map00620,map00625,map00626,map00650,map01100,map01110,map01120,map01130,map01220		R00228,R00623,R00754,R01172,R04880,R05233,R05234,R06917,R06927	RC00004,RC00050,RC00088,RC00099,RC00116,RC00184,RC00649,RC01195	C	belongs to the iron- containing alcohol dehydrogenase family
1089447.RHAA1_04841	1_1705	2.3e-63	248.1	Pasteurellales	grcA	GO:0003674,GO:0003824,GO:0005575,GO:0005622,GO:0005623,GO:0005737,GO:0005829,GO:0006082,GO:0006520,GO:0006566,GO:0006567,GO:0006807,GO:0008150,GO:0008152,GO:0008861,GO:0009056,GO:0009063,GO:0009066,GO:0009068,GO:0009987,GO:0016054,GO:0016407,GO:0016408,GO:0016453,GO:0016740,GO:0016746,GO:0016747,GO:0019752,GO:0043436,GO:0044237,GO:0044238,GO:0044248,GO:0044281,GO:0044282,GO:0044424,GO:0044444,GO:…	1.14.13.236	ko:K06866,ko:K15763,ko:K22361	ko00623,ko00625,ko01100,ko01120,ko01220,map00623,map00625,map01100,map01120,map01220	M00538	R02550,R03562,R05444,R05666,R11901	RC00269,RC00490,RC01383	S	Acts as a radical domain for damaged PFL and possibly other radical proteins
339671.Asuc_0724	1_524	1.7e-66	258.8	Pasteurellales	tadA	GO:0002097,GO:0002100,GO:0006139,GO:0006382,GO:0006396,GO:0006399,GO:0006400,GO:0006725,GO:0006807,GO:0008033,GO:0008150,GO:0008152,GO:0009451,GO:0009987,GO:0010467,GO:0016070,GO:0016553,GO:0034470,GO:0034641,GO:0034660,GO:0043170,GO:0043412,GO:0044237,GO:0044238,GO:0046483,GO:0071704,GO:0090304,GO:1901360	3.4.17.13,3.5.4.1,3.5.4.3,3.5.4.33,3.8.1.5	ko:K01297,ko:K01485,ko:K01487,ko:K01563,ko:K11991	ko00230,ko00240,ko00330,ko00361,ko00625,ko01100,ko01120,map00230,map00240,map00330,map00361,map00625,map01100,map01120		R00974,R01411,R01676,R02922,R05284,R05367,R05368,R05369,R05370,R07669,R07670,R10223	RC00074,RC00204,RC00477,RC00514,RC00809,RC01317,RC01340,RC01341,RC02013	FJ	Catalyzes the deamination of adenosine to inosine at the wobble position 34 of tRNA(Arg2)
1121859.KB890756_gene1438	1_1163	1.7e-109	402.5	Cytophagia	yghX		3.1.1.45	ko:K01061	ko00361,ko00364,ko00623,ko01100,ko01110,ko01120,ko01130,map00361,map00364,map00623,map01100,map01110,map01120,map01130		R03893,R05510,R05511,R06835,R06838,R08120,R08121,R09136,R09220,R09222	RC01018,RC01906,RC01907,RC02441,RC02467,RC02468,RC02674,RC02675,RC02686	Q	dienelactone hydrolase
383372.Rcas_2413	1_1505	7.1e-107	394	Chloroflexia			1.13.11.2	ko:K00446	ko00361,ko00362,ko00622,ko00643,ko01100,ko01120,ko01220,map00361,map00362,map00622,map00643,map01100,map01120,map01220	M00569	R00816,R04089,R05295,R05404,R05406,R07795	RC00387,RC00643,RC01075,RC01364,RC01914	E	PFAM Glyoxalase bleomycin resistance protein dioxygenase
1121859.KB890756_gene1438	1_1163	1.7e-109	402.5	Cytophagia	yghX		3.1.1.45	ko:K01061	ko00361,ko00364,ko00623,ko01100,ko01110,ko01120,ko01130,map00361,map00364,map00623,map01100,map01110,map01120,map01130		R03893,R05510,R05511,R06835,R06838,R08120,R08121,R09136,R09220,R09222	RC01018,RC01906,RC01907,RC02441,RC02467,RC02468,RC02674,RC02675,RC02686	Q	dienelactone hydrolase
1089447.RHAA1_04841	1_1705	2.3e-63	248.1	Pasteurellales	grcA	GO:0003674,GO:0003824,GO:0005575,GO:0005622,GO:0005623,GO:0005737,GO:0005829,GO:0006082,GO:0006520,GO:0006566,GO:0006567,GO:0006807,GO:0008150,GO:0008152,GO:0008861,GO:0009056,GO:0009063,GO:0009066,GO:0009068,GO:0009987,GO:0016054,GO:0016407,GO:0016408,GO:0016453,GO:0016740,GO:0016746,GO:0016747,GO:0019752,GO:0043436,GO:0044237,GO:0044238,GO:0044248,GO:0044281,GO:0044282,GO:0044424,GO:0044444,GO:…	1.14.13.236	ko:K06866,ko:K15763,ko:K22361	ko00623,ko00625,ko01100,ko01120,ko01220,map00623,map00625,map01100,map01120,map01220	M00538	R02550,R03562,R05444,R05666,R11901	RC00269,RC00490,RC01383	S	Acts as a radical domain for damaged PFL and possibly other radical proteins
1366050.N234_09400	1_1495	7.7e-13	79.3	Burkholderiaceae	dmpI		5.3.2.6	ko:K01821	ko00362,ko00621,ko00622,ko01100,ko01120,ko01220,map00362,map00621,map00622,map01100,map01120,map01220	M00569	R03966,R05389	RC01040,RC01355	G	4-oxalocrotonate tautomerase
1301098.PKB_3259	1_1496	1.4e-94	352.8	Gammaproteobacteria	mhpD		4.1.1.77,4.2.1.132,4.2.1.80	ko:K01617,ko:K02509,ko:K02554,ko:K18364	ko00350,ko00360,ko00362,ko00621,ko00622,ko01100,ko01120,ko01220,map00350,map00360,map00362,map00621,map00622,map01100,map01120,map01220	M00545,M00569	R02601,R02602,R04132,R04781,R05374,R05864,R06897	RC00750,RC00751,RC01213,RC01615,RC02595,RC02672,RC02676	Q	hydratase
1229205.BUPH_05359	1_1497	5.5e-96	357.5	Burkholderiaceae	amnE		4.1.1.77,4.2.1.80	ko:K01617,ko:K02509,ko:K02554	ko00350,ko00360,ko00362,ko00621,ko00622,ko01100,ko01120,ko01220,map00350,map00360,map00362,map00621,map00622,map01100,map01120,map01220	M00545,M00569	R02601,R02602,R04132,R04781,R05374,R06897	RC00750,RC00751,RC01213,RC01615,RC02595,RC02672	Q	4-oxalocrotonate decarboxylase
1006000.GKAS_01570	1_1498	1.8e-133	482.3	Gammaproteobacteria	mhpF	GO:0003674,GO:0003824,GO:0008150,GO:0008152,GO:0008774,GO:0016491,GO:0016620,GO:0016903,GO:0055114	1.2.1.10	ko:K04073	ko00360,ko00362,ko00620,ko00621,ko00622,ko00650,ko01100,ko01120,ko01220,map00360,map00362,map00620,map00621,map00622,map00650,map01100,map01120,map01220	M00545,M00569	R00228,R01172	RC00004,RC00184,RC01195	Q	Catalyzes the conversion of acetaldehyde to acetyl-CoA, using NAD( ) and coenzyme A. Is the final enzyme in the meta- cleavage pathway for the degradation of aromatic compounds
1217713.F993_01329	1_1499	9.7e-162	576.2	Moraxellaceae	mhpE	GO:0003674,GO:0003824,GO:0008701,GO:0016829,GO:0016830,GO:0016833	4.1.3.39	ko:K01666	ko00360,ko00362,ko00621,ko00622,ko01100,ko01120,ko01220,map00360,map00362,map00621,map00622,map01100,map01120,map01220	M00545,M00569	R00750	RC00307,RC00371	H	Catalyzes the retro-aldol cleavage of 4-hydroxy-2- oxopentanoate to pyruvate and acetaldehyde. Is involved in the meta-cleavage pathway for the degradation of aromatic compounds
383372.Rcas_2413	1_1505	7.1e-107	394	Chloroflexia			1.13.11.2	ko:K00446	ko00361,ko00362,ko00622,ko00643,ko01100,ko01120,ko01220,map00361,map00362,map00622,map00643,map01100,map01120,map01220	M00569	R00816,R04089,R05295,R05404,R05406,R07795	RC00387,RC00643,RC01075,RC01364,RC01914	E	PFAM Glyoxalase bleomycin resistance protein dioxygenase
1461579.CCNK01000036_gene1539	1_1162	1.3e-79	302.8	Gammaproteobacteria	nfnB		1.5.1.34	ko:K10679	ko00633,ko01120,map00633,map01120		R08014,R08017,R08042	RC00250	C	Nitroreductase
1120980.JQKH01000015_gene1939	1_1563	4.4e-79	301.2	Neisseriales	nfsA	GO:0000166,GO:0003674,GO:0003824,GO:0005488,GO:0005575,GO:0005622,GO:0005623,GO:0005737,GO:0005829,GO:0008150,GO:0008152,GO:0010181,GO:0016491,GO:0016651,GO:0016657,GO:0032553,GO:0034567,GO:0036094,GO:0043167,GO:0043168,GO:0044424,GO:0044444,GO:0044464,GO:0048037,GO:0050662,GO:0055114,GO:0097159,GO:0097367,GO:1901265,GO:1901363	1.5.1.38,1.5.1.39	ko:K10678,ko:K19285,ko:K19286	ko00633,ko00740,ko01100,ko01120,map00633,map00740,map01100,map01120		R05705,R05706,R08014,R08017,R08042	RC00126,RC00250	C	Nitroreductase family
383372.Rcas_2413	1_1505	7.1e-107	394	Chloroflexia			1.13.11.2	ko:K00446	ko00361,ko00362,ko00622,ko00643,ko01100,ko01120,ko01220,map00361,map00362,map00622,map00643,map01100,map01120,map01220	M00569	R00816,R04089,R05295,R05404,R05406,R07795	RC00387,RC00643,RC01075,RC01364,RC01914	E	PFAM Glyoxalase bleomycin resistance protein dioxygenase
759914.BP951000_0639	1_1699	2.6e-209	734.9	Bacteria	ydiF		2.8.3.1	ko:K01026	ko00620,ko00640,ko00643,ko01100,ko01120,map00620,map00640,map00643,map01100,map01120		R00928,R01449,R05508	RC00012,RC00014,RC00137	I	ketone body catabolic process
1366050.N234_09400	1_1495	7.7e-13	79.3	Burkholderiaceae	dmpI		5.3.2.6	ko:K01821	ko00362,ko00621,ko00622,ko01100,ko01120,ko01220,map00362,map00621,map00622,map01100,map01120,map01220	M00569	R03966,R05389	RC01040,RC01355	G	4-oxalocrotonate tautomerase
1301098.PKB_3259	1_1496	1.4e-94	352.8	Gammaproteobacteria	mhpD		4.1.1.77,4.2.1.132,4.2.1.80	ko:K01617,ko:K02509,ko:K02554,ko:K18364	ko00350,ko00360,ko00362,ko00621,ko00622,ko01100,ko01120,ko01220,map00350,map00360,map00362,map00621,map00622,map01100,map01120,map01220	M00545,M00569	R02601,R02602,R04132,R04781,R05374,R05864,R06897	RC00750,RC00751,RC01213,RC01615,RC02595,RC02672,RC02676	Q	hydratase
1229205.BUPH_05359	1_1497	5.5e-96	357.5	Burkholderiaceae	amnE		4.1.1.77,4.2.1.80	ko:K01617,ko:K02509,ko:K02554	ko00350,ko00360,ko00362,ko00621,ko00622,ko01100,ko01120,ko01220,map00350,map00360,map00362,map00621,map00622,map01100,map01120,map01220	M00545,M00569	R02601,R02602,R04132,R04781,R05374,R06897	RC00750,RC00751,RC01213,RC01615,RC02595,RC02672	Q	4-oxalocrotonate decarboxylase
1006000.GKAS_01570	1_1498	1.8e-133	482.3	Gammaproteobacteria	mhpF	GO:0003674,GO:0003824,GO:0008150,GO:0008152,GO:0008774,GO:0016491,GO:0016620,GO:0016903,GO:0055114	1.2.1.10	ko:K04073	ko00360,ko00362,ko00620,ko00621,ko00622,ko00650,ko01100,ko01120,ko01220,map00360,map00362,map00620,map00621,map00622,map00650,map01100,map01120,map01220	M00545,M00569	R00228,R01172	RC00004,RC00184,RC01195	Q	Catalyzes the conversion of acetaldehyde to acetyl-CoA, using NAD( ) and coenzyme A. Is the final enzyme in the meta- cleavage pathway for the degradation of aromatic compounds
1217713.F993_01329	1_1499	9.7e-162	576.2	Moraxellaceae	mhpE	GO:0003674,GO:0003824,GO:0008701,GO:0016829,GO:0016830,GO:0016833	4.1.3.39	ko:K01666	ko00360,ko00362,ko00621,ko00622,ko01100,ko01120,ko01220,map00360,map00362,map00621,map00622,map01100,map01120,map01220	M00545,M00569	R00750	RC00307,RC00371	H	Catalyzes the retro-aldol cleavage of 4-hydroxy-2- oxopentanoate to pyruvate and acetaldehyde. Is involved in the meta-cleavage pathway for the degradation of aromatic compounds
1121024.AUCD01000013_gene145	1_748	8e-90	337.4	Carnobacteriaceae	gldA	GO:0003674,GO:0003824,GO:0005488,GO:0005515,GO:0008150,GO:0008152,GO:0016491,GO:0016614,GO:0016616,GO:0042802,GO:0047545,GO:0055114	1.1.1.1,1.1.1.6	ko:K00001,ko:K00005,ko:K08317	ko00010,ko00071,ko00350,ko00561,ko00625,ko00626,ko00640,ko00830,ko00980,ko00982,ko01100,ko01110,ko01120,ko01130,ko01220,map00010,map00071,map00350,map00561,map00625,map00626,map00640,map00830,map00980,map00982,map01100,map01110,map01120,map01130,map01220		R00623,R00754,R01034,R02124,R04805,R04880,R05233,R05234,R06917,R06927,R07105,R08281,R08306,R08310,R10715,R10717	RC00029,RC00050,RC00087,RC00088,RC00099,RC00116,RC00117,RC00649,RC00670,RC01734,RC02273	C	Iron-containing alcohol dehydrogenase
339671.Asuc_0159	1_806	6.9e-144	516.9	Pasteurellales	yjjN	GO:0003674,GO:0003824,GO:0005975,GO:0006082,GO:0008150,GO:0008152,GO:0009056,GO:0009987,GO:0016052,GO:0016054,GO:0016491,GO:0016614,GO:0016616,GO:0019520,GO:0019583,GO:0019584,GO:0019752,GO:0032787,GO:0034193,GO:0034195,GO:0043436,GO:0044237,GO:0044238,GO:0044248,GO:0044262,GO:0044275,GO:0044281,GO:0044282,GO:0046176,GO:0046395,GO:0055114,GO:0071704,GO:0072329,GO:1901575	1.1.1.1,1.1.1.58	ko:K00001,ko:K00041	ko00010,ko00040,ko00071,ko00350,ko00625,ko00626,ko00830,ko00980,ko00982,ko01100,ko01110,ko01120,ko01130,ko01220,map00010,map00040,map00071,map00350,map00625,map00626,map00830,map00980,map00982,map01100,map01110,map01120,map01130,map01220	M00631	R00623,R00754,R02124,R02555,R04805,R04880,R05233,R05234,R06917,R06927,R07105,R08281,R08306,R08310	RC00050,RC00085,RC00087,RC00088,RC00099,RC00116,RC00649,RC01734,RC02273	E	Zinc-binding dehydrogenase
221988.MS2325	1_870	1.9e-182	645.2	Pasteurellales	fucO		1.1.1.1,1.1.1.77,1.1.99.37,1.2.98.1	ko:K00048,ko:K13954,ko:K17067	ko00010,ko00071,ko00350,ko00625,ko00626,ko00630,ko00640,ko00680,ko01100,ko01110,ko01120,ko01130,ko01200,ko01220,map00010,map00071,map00350,map00625,map00626,map00630,map00640,map00680,map01100,map01110,map01120,map01130,map01200,map01220		R00614,R00623,R00754,R01781,R02257,R04880,R05233,R05234,R06917,R06927	RC00034,RC00050,RC00087,RC00088,RC00099,RC00116,RC00188,RC00649	C	Lactaldehyde reductase of Bacteria UniRef RepID A6LQL3_CLOB8
1006004.GBAG_0965	1_1168	3.4e-149	534.6	Gammaproteobacteria	adhC2		1.1.1.1	ko:K13953,ko:K13979	ko00010,ko00071,ko00350,ko00625,ko00626,ko00830,ko00980,ko00982,ko01100,ko01110,ko01120,ko01130,ko01220,map00010,map00071,map00350,map00625,map00626,map00830,map00980,map00982,map01100,map01110,map01120,map01130,map01220		R00623,R00754,R02124,R04880,R05233,R05234,R06917,R06927,R07105,R08281,R08306,R08310	RC00050,RC00087,RC00088,RC00099,RC00116,RC00649,RC01734,RC02273	S	alcohol dehydrogenase
641147.HMPREF9021_00672	1_1172	9.9e-200	702.6	Neisseriales	adhC		1.1.1.1,1.1.1.284	ko:K00121	ko00010,ko00071,ko00350,ko00625,ko00626,ko00680,ko00830,ko00980,ko00982,ko01100,ko01110,ko01120,ko01130,ko01200,ko01220,ko05204,map00010,map00071,map00350,map00625,map00626,map00680,map00830,map00980,map00982,map01100,map01110,map01120,map01130,map01200,map01220,map05204		R00623,R00754,R02124,R04880,R05233,R05234,R06917,R06927,R06983,R07105,R08281,R08306,R08310	RC00050,RC00087,RC00088,RC00099,RC00116,RC00649,RC01715,RC01734,RC02273	C	Belongs to the zinc-containing alcohol dehydrogenase family. Class-III subfamily
416269.APL_1011	1_1184	0	1562	Pasteurellales	adhE		1.1.1.1,1.2.1.10	ko:K04072	ko00010,ko00071,ko00350,ko00620,ko00625,ko00626,ko00650,ko01100,ko01110,ko01120,ko01130,ko01220,map00010,map00071,map00350,map00620,map00625,map00626,map00650,map01100,map01110,map01120,map01130,map01220		R00228,R00623,R00754,R01172,R04880,R05233,R05234,R06917,R06927	RC00004,RC00050,RC00088,RC00099,RC00116,RC00184,RC00649,RC01195	C	belongs to the iron- containing alcohol dehydrogenase family
1121024.AUCD01000013_gene145	1_748	8e-90	337.4	Carnobacteriaceae	gldA	GO:0003674,GO:0003824,GO:0005488,GO:0005515,GO:0008150,GO:0008152,GO:0016491,GO:0016614,GO:0016616,GO:0042802,GO:0047545,GO:0055114	1.1.1.1,1.1.1.6	ko:K00001,ko:K00005,ko:K08317	ko00010,ko00071,ko00350,ko00561,ko00625,ko00626,ko00640,ko00830,ko00980,ko00982,ko01100,ko01110,ko01120,ko01130,ko01220,map00010,map00071,map00350,map00561,map00625,map00626,map00640,map00830,map00980,map00982,map01100,map01110,map01120,map01130,map01220		R00623,R00754,R01034,R02124,R04805,R04880,R05233,R05234,R06917,R06927,R07105,R08281,R08306,R08310,R10715,R10717	RC00029,RC00050,RC00087,RC00088,RC00099,RC00116,RC00117,RC00649,RC00670,RC01734,RC02273	C	Iron-containing alcohol dehydrogenase
339671.Asuc_0159	1_806	6.9e-144	516.9	Pasteurellales	yjjN	GO:0003674,GO:0003824,GO:0005975,GO:0006082,GO:0008150,GO:0008152,GO:0009056,GO:0009987,GO:0016052,GO:0016054,GO:0016491,GO:0016614,GO:0016616,GO:0019520,GO:0019583,GO:0019584,GO:0019752,GO:0032787,GO:0034193,GO:0034195,GO:0043436,GO:0044237,GO:0044238,GO:0044248,GO:0044262,GO:0044275,GO:0044281,GO:0044282,GO:0046176,GO:0046395,GO:0055114,GO:0071704,GO:0072329,GO:1901575	1.1.1.1,1.1.1.58	ko:K00001,ko:K00041	ko00010,ko00040,ko00071,ko00350,ko00625,ko00626,ko00830,ko00980,ko00982,ko01100,ko01110,ko01120,ko01130,ko01220,map00010,map00040,map00071,map00350,map00625,map00626,map00830,map00980,map00982,map01100,map01110,map01120,map01130,map01220	M00631	R00623,R00754,R02124,R02555,R04805,R04880,R05233,R05234,R06917,R06927,R07105,R08281,R08306,R08310	RC00050,RC00085,RC00087,RC00088,RC00099,RC00116,RC00649,RC01734,RC02273	E	Zinc-binding dehydrogenase
339671.Asuc_0187	1_988	4.5e-77	294.3	Pasteurellales	gst	GO:0005575,GO:0005622,GO:0005623,GO:0005737,GO:0044424,GO:0044464	2.5.1.18	ko:K00799	ko00480,ko00980,ko00982,ko00983,ko01524,ko05200,ko05204,ko05225,ko05418,map00480,map00980,map00982,map00983,map01524,map05200,map05204,map05225,map05418		R03522,R07002,R07003,R07004,R07023,R07024,R07025,R07026,R07069,R07070,R07083,R07084,R07091,R07092,R07093,R07094,R07100,R07113,R07116,R08280,R09409,R11905	RC00004,RC00069,RC00840,RC00948,RC01704,RC01705,RC01706,RC01758,RC01759,RC01765,RC01767,RC01769,RC02243,RC02527,RC02939,RC02940,RC02942,RC02943,RC02944	O	Belongs to the GST superfamily
1120980.JQKH01000103_gene576	1_1149	3.9e-27	127.1	Neisseriales	gst	GO:0005575,GO:0005622,GO:0005623,GO:0005737,GO:0044424,GO:0044464	2.5.1.18	ko:K00799	ko00480,ko00980,ko00982,ko00983,ko01524,ko05200,ko05204,ko05225,ko05418,map00480,map00980,map00982,map00983,map01524,map05200,map05204,map05225,map05418		R03522,R07002,R07003,R07004,R07023,R07024,R07025,R07026,R07069,R07070,R07083,R07084,R07091,R07092,R07093,R07094,R07100,R07113,R07116,R08280,R09409,R11905	RC00004,RC00069,RC00840,RC00948,RC01704,RC01705,RC01706,RC01758,RC01759,RC01765,RC01767,RC01769,RC02243,RC02527,RC02939,RC02940,RC02942,RC02943,RC02944	O	Glutathione S-transferase, C-terminal domain
1006004.GBAG_0965	1_1168	3.4e-149	534.6	Gammaproteobacteria	adhC2		1.1.1.1	ko:K13953,ko:K13979	ko00010,ko00071,ko00350,ko00625,ko00626,ko00830,ko00980,ko00982,ko01100,ko01110,ko01120,ko01130,ko01220,map00010,map00071,map00350,map00625,map00626,map00830,map00980,map00982,map01100,map01110,map01120,map01130,map01220		R00623,R00754,R02124,R04880,R05233,R05234,R06917,R06927,R07105,R08281,R08306,R08310	RC00050,RC00087,RC00088,RC00099,RC00116,RC00649,RC01734,RC02273	S	alcohol dehydrogenase
641147.HMPREF9021_00672	1_1172	9.9e-200	702.6	Neisseriales	adhC		1.1.1.1,1.1.1.284	ko:K00121	ko00010,ko00071,ko00350,ko00625,ko00626,ko00680,ko00830,ko00980,ko00982,ko01100,ko01110,ko01120,ko01130,ko01200,ko01220,ko05204,map00010,map00071,map00350,map00625,map00626,map00680,map00830,map00980,map00982,map01100,map01110,map01120,map01130,map01200,map01220,map05204		R00623,R00754,R02124,R04880,R05233,R05234,R06917,R06927,R06983,R07105,R08281,R08306,R08310	RC00050,RC00087,RC00088,RC00099,RC00116,RC00649,RC01715,RC01734,RC02273	C	Belongs to the zinc-containing alcohol dehydrogenase family. Class-III subfamily
1120980.JQKH01000103_gene576	1_1191	1.1e-12	78.6	Neisseriales	gst	GO:0005575,GO:0005622,GO:0005623,GO:0005737,GO:0044424,GO:0044464	2.5.1.18	ko:K00799	ko00480,ko00980,ko00982,ko00983,ko01524,ko05200,ko05204,ko05225,ko05418,map00480,map00980,map00982,map00983,map01524,map05200,map05204,map05225,map05418		R03522,R07002,R07003,R07004,R07023,R07024,R07025,R07026,R07069,R07070,R07083,R07084,R07091,R07092,R07093,R07094,R07100,R07113,R07116,R08280,R09409,R11905	RC00004,RC00069,RC00840,RC00948,RC01704,RC01705,RC01706,RC01758,RC01759,RC01765,RC01767,RC01769,RC02243,RC02527,RC02939,RC02940,RC02942,RC02943,RC02944	O	Glutathione S-transferase, C-terminal domain
568768.CM001975_gene2441	1_1572	6.4e-47	194.1	Dickeya			2.5.1.18	ko:K00799	ko00480,ko00980,ko00982,ko00983,ko01524,ko05200,ko05204,ko05225,ko05418,map00480,map00980,map00982,map00983,map01524,map05200,map05204,map05225,map05418		R03522,R07002,R07003,R07004,R07023,R07024,R07025,R07026,R07069,R07070,R07083,R07084,R07091,R07092,R07093,R07094,R07100,R07113,R07116,R08280,R09409,R11905	RC00004,RC00069,RC00840,RC00948,RC01704,RC01705,RC01706,RC01758,RC01759,RC01765,RC01767,RC01769,RC02243,RC02527,RC02939,RC02940,RC02942,RC02943,RC02944	O	Glutathione S-transferase, C-terminal domain
591023.AM202_04347	4_35	3.9e-81	307.8	Pasteurellales	ureX		2.5.1.18	ko:K00799	ko00480,ko00980,ko00982,ko00983,ko01524,ko05200,ko05204,ko05225,ko05418,map00480,map00980,map00982,map00983,map01524,map05200,map05204,map05225,map05418		R03522,R07002,R07003,R07004,R07023,R07024,R07025,R07026,R07069,R07070,R07083,R07084,R07091,R07092,R07093,R07094,R07100,R07113,R07116,R08280,R09409,R11905	RC00004,RC00069,RC00840,RC00948,RC01704,RC01705,RC01706,RC01758,RC01759,RC01765,RC01767,RC01769,RC02243,RC02527,RC02939,RC02940,RC02942,RC02943,RC02944	O	Glutathione S-transferase
1121024.AUCD01000013_gene145	1_748	8e-90	337.4	Carnobacteriaceae	gldA	GO:0003674,GO:0003824,GO:0005488,GO:0005515,GO:0008150,GO:0008152,GO:0016491,GO:0016614,GO:0016616,GO:0042802,GO:0047545,GO:0055114	1.1.1.1,1.1.1.6	ko:K00001,ko:K00005,ko:K08317	ko00010,ko00071,ko00350,ko00561,ko00625,ko00626,ko00640,ko00830,ko00980,ko00982,ko01100,ko01110,ko01120,ko01130,ko01220,map00010,map00071,map00350,map00561,map00625,map00626,map00640,map00830,map00980,map00982,map01100,map01110,map01120,map01130,map01220		R00623,R00754,R01034,R02124,R04805,R04880,R05233,R05234,R06917,R06927,R07105,R08281,R08306,R08310,R10715,R10717	RC00029,RC00050,RC00087,RC00088,RC00099,RC00116,RC00117,RC00649,RC00670,RC01734,RC02273	C	Iron-containing alcohol dehydrogenase
339671.Asuc_0159	1_806	6.9e-144	516.9	Pasteurellales	yjjN	GO:0003674,GO:0003824,GO:0005975,GO:0006082,GO:0008150,GO:0008152,GO:0009056,GO:0009987,GO:0016052,GO:0016054,GO:0016491,GO:0016614,GO:0016616,GO:0019520,GO:0019583,GO:0019584,GO:0019752,GO:0032787,GO:0034193,GO:0034195,GO:0043436,GO:0044237,GO:0044238,GO:0044248,GO:0044262,GO:0044275,GO:0044281,GO:0044282,GO:0046176,GO:0046395,GO:0055114,GO:0071704,GO:0072329,GO:1901575	1.1.1.1,1.1.1.58	ko:K00001,ko:K00041	ko00010,ko00040,ko00071,ko00350,ko00625,ko00626,ko00830,ko00980,ko00982,ko01100,ko01110,ko01120,ko01130,ko01220,map00010,map00040,map00071,map00350,map00625,map00626,map00830,map00980,map00982,map01100,map01110,map01120,map01130,map01220	M00631	R00623,R00754,R02124,R02555,R04805,R04880,R05233,R05234,R06917,R06927,R07105,R08281,R08306,R08310	RC00050,RC00085,RC00087,RC00088,RC00099,RC00116,RC00649,RC01734,RC02273	E	Zinc-binding dehydrogenase
339671.Asuc_0187	1_988	4.5e-77	294.3	Pasteurellales	gst	GO:0005575,GO:0005622,GO:0005623,GO:0005737,GO:0044424,GO:0044464	2.5.1.18	ko:K00799	ko00480,ko00980,ko00982,ko00983,ko01524,ko05200,ko05204,ko05225,ko05418,map00480,map00980,map00982,map00983,map01524,map05200,map05204,map05225,map05418		R03522,R07002,R07003,R07004,R07023,R07024,R07025,R07026,R07069,R07070,R07083,R07084,R07091,R07092,R07093,R07094,R07100,R07113,R07116,R08280,R09409,R11905	RC00004,RC00069,RC00840,RC00948,RC01704,RC01705,RC01706,RC01758,RC01759,RC01765,RC01767,RC01769,RC02243,RC02527,RC02939,RC02940,RC02942,RC02943,RC02944	O	Belongs to the GST superfamily
1120980.JQKH01000103_gene576	1_1149	3.9e-27	127.1	Neisseriales	gst	GO:0005575,GO:0005622,GO:0005623,GO:0005737,GO:0044424,GO:0044464	2.5.1.18	ko:K00799	ko00480,ko00980,ko00982,ko00983,ko01524,ko05200,ko05204,ko05225,ko05418,map00480,map00980,map00982,map00983,map01524,map05200,map05204,map05225,map05418		R03522,R07002,R07003,R07004,R07023,R07024,R07025,R07026,R07069,R07070,R07083,R07084,R07091,R07092,R07093,R07094,R07100,R07113,R07116,R08280,R09409,R11905	RC00004,RC00069,RC00840,RC00948,RC01704,RC01705,RC01706,RC01758,RC01759,RC01765,RC01767,RC01769,RC02243,RC02527,RC02939,RC02940,RC02942,RC02943,RC02944	O	Glutathione S-transferase, C-terminal domain
1006004.GBAG_0965	1_1168	3.4e-149	534.6	Gammaproteobacteria	adhC2		1.1.1.1	ko:K13953,ko:K13979	ko00010,ko00071,ko00350,ko00625,ko00626,ko00830,ko00980,ko00982,ko01100,ko01110,ko01120,ko01130,ko01220,map00010,map00071,map00350,map00625,map00626,map00830,map00980,map00982,map01100,map01110,map01120,map01130,map01220		R00623,R00754,R02124,R04880,R05233,R05234,R06917,R06927,R07105,R08281,R08306,R08310	RC00050,RC00087,RC00088,RC00099,RC00116,RC00649,RC01734,RC02273	S	alcohol dehydrogenase
641147.HMPREF9021_00672	1_1172	9.9e-200	702.6	Neisseriales	adhC		1.1.1.1,1.1.1.284	ko:K00121	ko00010,ko00071,ko00350,ko00625,ko00626,ko00680,ko00830,ko00980,ko00982,ko01100,ko01110,ko01120,ko01130,ko01200,ko01220,ko05204,map00010,map00071,map00350,map00625,map00626,map00680,map00830,map00980,map00982,map01100,map01110,map01120,map01130,map01200,map01220,map05204		R00623,R00754,R02124,R04880,R05233,R05234,R06917,R06927,R06983,R07105,R08281,R08306,R08310	RC00050,RC00087,RC00088,RC00099,RC00116,RC00649,RC01715,RC01734,RC02273	C	Belongs to the zinc-containing alcohol dehydrogenase family. Class-III subfamily
1120980.JQKH01000103_gene576	1_1191	1.1e-12	78.6	Neisseriales	gst	GO:0005575,GO:0005622,GO:0005623,GO:0005737,GO:0044424,GO:0044464	2.5.1.18	ko:K00799	ko00480,ko00980,ko00982,ko00983,ko01524,ko05200,ko05204,ko05225,ko05418,map00480,map00980,map00982,map00983,map01524,map05200,map05204,map05225,map05418		R03522,R07002,R07003,R07004,R07023,R07024,R07025,R07026,R07069,R07070,R07083,R07084,R07091,R07092,R07093,R07094,R07100,R07113,R07116,R08280,R09409,R11905	RC00004,RC00069,RC00840,RC00948,RC01704,RC01705,RC01706,RC01758,RC01759,RC01765,RC01767,RC01769,RC02243,RC02527,RC02939,RC02940,RC02942,RC02943,RC02944	O	Glutathione S-transferase, C-terminal domain
568768.CM001975_gene2441	1_1572	6.4e-47	194.1	Dickeya			2.5.1.18	ko:K00799	ko00480,ko00980,ko00982,ko00983,ko01524,ko05200,ko05204,ko05225,ko05418,map00480,map00980,map00982,map00983,map01524,map05200,map05204,map05225,map05418		R03522,R07002,R07003,R07004,R07023,R07024,R07025,R07026,R07069,R07070,R07083,R07084,R07091,R07092,R07093,R07094,R07100,R07113,R07116,R08280,R09409,R11905	RC00004,RC00069,RC00840,RC00948,RC01704,RC01705,RC01706,RC01758,RC01759,RC01765,RC01767,RC01769,RC02243,RC02527,RC02939,RC02940,RC02942,RC02943,RC02944	O	Glutathione S-transferase, C-terminal domain
591023.AM202_04347	4_35	3.9e-81	307.8	Pasteurellales	ureX		2.5.1.18	ko:K00799	ko00480,ko00980,ko00982,ko00983,ko01524,ko05200,ko05204,ko05225,ko05418,map00480,map00980,map00982,map00983,map01524,map05200,map05204,map05225,map05418		R03522,R07002,R07003,R07004,R07023,R07024,R07025,R07026,R07069,R07070,R07083,R07084,R07091,R07092,R07093,R07094,R07100,R07113,R07116,R08280,R09409,R11905	RC00004,RC00069,RC00840,RC00948,RC01704,RC01705,RC01706,RC01758,RC01759,RC01765,RC01767,RC01769,RC02243,RC02527,RC02939,RC02940,RC02942,RC02943,RC02944	O	Glutathione S-transferase
747.DR93_1027	1_323	1.1e-97	362.8	Pasteurellales	udk	GO:0003674,GO:0003824,GO:0004849,GO:0005575,GO:0005622,GO:0005623,GO:0005737,GO:0005829,GO:0006139,GO:0006206,GO:0006213,GO:0006220,GO:0006221,GO:0006222,GO:0006725,GO:0006753,GO:0006793,GO:0006796,GO:0006807,GO:0008150,GO:0008152,GO:0008655,GO:0009058,GO:0009112,GO:0009116,GO:0009117,GO:0009119,GO:0009123,GO:0009124,GO:0009129,GO:0009130,GO:0009156,GO:0009161,GO:0009163,GO:0009165,GO:0009173,GO:…	2.7.1.48	ko:K00876	ko00240,ko00983,ko01100,map00240,map00983,map01100		R00513,R00516,R00517,R00962,R00964,R00967,R00968,R00970,R01548,R01549,R01880,R02091,R02096,R02097,R02327,R02332,R02371,R02372,R08232	RC00002,RC00017	F	Cytidine monophosphokinase
1461579.CCNK01000020_gene514	1_592	3.4e-87	327.8	Pasteurellales	tdk	GO:0003674,GO:0003824,GO:0004797,GO:0005575,GO:0005622,GO:0005623,GO:0005737,GO:0005829,GO:0006139,GO:0006213,GO:0006259,GO:0006725,GO:0006753,GO:0006793,GO:0006796,GO:0006807,GO:0008150,GO:0008152,GO:0009058,GO:0009116,GO:0009117,GO:0009120,GO:0009123,GO:0009124,GO:0009157,GO:0009162,GO:0009165,GO:0009987,GO:0015949,GO:0016301,GO:0016310,GO:0016740,GO:0016772,GO:0018130,GO:0019136,GO:0019205,GO:…	2.7.1.21	ko:K00857	ko00240,ko00983,ko01100,map00240,map00983,map01100		R01567,R02099,R08233	RC00002,RC00017	F	thymidine kinase
1028803.GG9_0838	1_773	3.5e-74	284.3	Pasteurellales	dut	GO:0000166,GO:0000287,GO:0001882,GO:0001884,GO:0002134,GO:0003674,GO:0003824,GO:0004170,GO:0005488,GO:0005575,GO:0005622,GO:0005623,GO:0005737,GO:0005829,GO:0006139,GO:0006220,GO:0006221,GO:0006226,GO:0006244,GO:0006725,GO:0006753,GO:0006793,GO:0006796,GO:0006807,GO:0008150,GO:0008152,GO:0009056,GO:0009058,GO:0009117,GO:0009123,GO:0009124,GO:0009129,GO:0009130,GO:0009141,GO:0009143,GO:0009147,GO:…	3.6.1.23,4.1.1.36,6.3.2.5	ko:K01520,ko:K13038	ko00240,ko00770,ko00983,ko01100,map00240,map00770,map00983,map01100	M00053,M00120	R02100,R03269,R04231,R11896	RC00002,RC00064,RC00090,RC00822	F	This enzyme is involved in nucleotide metabolism it produces dUMP, the immediate precursor of thymidine nucleotides and it decreases the intracellular concentration of dUTP so that uracil cannot be incorporated into DNA
339671.Asuc_0187	1_988	4.5e-77	294.3	Pasteurellales	gst	GO:0005575,GO:0005622,GO:0005623,GO:0005737,GO:0044424,GO:0044464	2.5.1.18	ko:K00799	ko00480,ko00980,ko00982,ko00983,ko01524,ko05200,ko05204,ko05225,ko05418,map00480,map00980,map00982,map00983,map01524,map05200,map05204,map05225,map05418		R03522,R07002,R07003,R07004,R07023,R07024,R07025,R07026,R07069,R07070,R07083,R07084,R07091,R07092,R07093,R07094,R07100,R07113,R07116,R08280,R09409,R11905	RC00004,RC00069,RC00840,RC00948,RC01704,RC01705,RC01706,RC01758,RC01759,RC01765,RC01767,RC01769,RC02243,RC02527,RC02939,RC02940,RC02942,RC02943,RC02944	O	Belongs to the GST superfamily
1120980.JQKH01000103_gene576	1_1149	3.9e-27	127.1	Neisseriales	gst	GO:0005575,GO:0005622,GO:0005623,GO:0005737,GO:0044424,GO:0044464	2.5.1.18	ko:K00799	ko00480,ko00980,ko00982,ko00983,ko01524,ko05200,ko05204,ko05225,ko05418,map00480,map00980,map00982,map00983,map01524,map05200,map05204,map05225,map05418		R03522,R07002,R07003,R07004,R07023,R07024,R07025,R07026,R07069,R07070,R07083,R07084,R07091,R07092,R07093,R07094,R07100,R07113,R07116,R08280,R09409,R11905	RC00004,RC00069,RC00840,RC00948,RC01704,RC01705,RC01706,RC01758,RC01759,RC01765,RC01767,RC01769,RC02243,RC02527,RC02939,RC02940,RC02942,RC02943,RC02944	O	Glutathione S-transferase, C-terminal domain
1120980.JQKH01000103_gene576	1_1191	1.1e-12	78.6	Neisseriales	gst	GO:0005575,GO:0005622,GO:0005623,GO:0005737,GO:0044424,GO:0044464	2.5.1.18	ko:K00799	ko00480,ko00980,ko00982,ko00983,ko01524,ko05200,ko05204,ko05225,ko05418,map00480,map00980,map00982,map00983,map01524,map05200,map05204,map05225,map05418		R03522,R07002,R07003,R07004,R07023,R07024,R07025,R07026,R07069,R07070,R07083,R07084,R07091,R07092,R07093,R07094,R07100,R07113,R07116,R08280,R09409,R11905	RC00004,RC00069,RC00840,RC00948,RC01704,RC01705,RC01706,RC01758,RC01759,RC01765,RC01767,RC01769,RC02243,RC02527,RC02939,RC02940,RC02942,RC02943,RC02944	O	Glutathione S-transferase, C-terminal domain
228399.appser1_19620	1_1315	2.4e-128	464.9	Pasteurellales	udp	GO:0003674,GO:0003824,GO:0004850,GO:0005488,GO:0005515,GO:0005575,GO:0005622,GO:0005623,GO:0005737,GO:0005829,GO:0006139,GO:0006213,GO:0006218,GO:0006725,GO:0006807,GO:0006950,GO:0006974,GO:0008150,GO:0008152,GO:0009056,GO:0009116,GO:0009119,GO:0009164,GO:0009987,GO:0016043,GO:0016740,GO:0016757,GO:0016763,GO:0019439,GO:0022607,GO:0030955,GO:0031420,GO:0033554,GO:0034214,GO:0034641,GO:0034655,GO:…	2.4.2.3	ko:K00757	ko00240,ko00983,ko01100,map00240,map00983,map01100		R01876,R02484,R08229	RC00063	F	Catalyzes the reversible phosphorylytic cleavage of uridine and deoxyuridine to uracil and ribose- or deoxyribose-1- phosphate. The produced molecules are then utilized as carbon and energy sources or in the rescue of pyrimidine bases for nucleotide synthesis
568768.CM001975_gene2441	1_1572	6.4e-47	194.1	Dickeya			2.5.1.18	ko:K00799	ko00480,ko00980,ko00982,ko00983,ko01524,ko05200,ko05204,ko05225,ko05418,map00480,map00980,map00982,map00983,map01524,map05200,map05204,map05225,map05418		R03522,R07002,R07003,R07004,R07023,R07024,R07025,R07026,R07069,R07070,R07083,R07084,R07091,R07092,R07093,R07094,R07100,R07113,R07116,R08280,R09409,R11905	RC00004,RC00069,RC00840,RC00948,RC01704,RC01705,RC01706,RC01758,RC01759,RC01765,RC01767,RC01769,RC02243,RC02527,RC02939,RC02940,RC02942,RC02943,RC02944	O	Glutathione S-transferase, C-terminal domain
1095749.HMPREF1052_0549	1_1718	2.7e-74	284.6	Pasteurellales	ybeY	GO:0000469,GO:0000478,GO:0003674,GO:0003824,GO:0004518,GO:0004519,GO:0004521,GO:0004540,GO:0005488,GO:0006139,GO:0006355,GO:0006364,GO:0006396,GO:0006412,GO:0006518,GO:0006725,GO:0006807,GO:0006950,GO:0008150,GO:0008152,GO:0009058,GO:0009059,GO:0009266,GO:0009408,GO:0009628,GO:0009889,GO:0009987,GO:0010467,GO:0010468,GO:0010556,GO:0016070,GO:0016072,GO:0016151,GO:0016787,GO:0016788,GO:0016892,GO:…	2.6.99.2,3.5.4.5	ko:K01489,ko:K03474,ko:K03595,ko:K07042	ko00240,ko00750,ko00983,ko01100,map00240,map00750,map00983,map01100	M00124	R01878,R02485,R05838,R08221	RC00074,RC00514,RC01476	J	Single strand-specific metallo-endoribonuclease involved in late-stage 70S ribosome quality control and in maturation of the 3' terminus of the 16S rRNA
1433287.X808_9650	1_1893	2.2e-247	861.3	Pasteurellales	guaB	GO:0003674,GO:0003824,GO:0003938,GO:0005488,GO:0005515,GO:0005575,GO:0005622,GO:0005623,GO:0005737,GO:0005829,GO:0006139,GO:0006163,GO:0006164,GO:0006183,GO:0006725,GO:0006753,GO:0006793,GO:0006796,GO:0006807,GO:0008150,GO:0008152,GO:0009058,GO:0009116,GO:0009117,GO:0009119,GO:0009141,GO:0009142,GO:0009144,GO:0009145,GO:0009150,GO:0009152,GO:0009163,GO:0009165,GO:0009199,GO:0009201,GO:0009205,GO:…	1.1.1.205	ko:K00088	ko00230,ko00983,ko01100,ko01110,map00230,map00983,map01100,map01110	M00050	R01130,R08240	RC00143,RC02207	F	Catalyzes the conversion of inosine 5'-phosphate (IMP) to xanthosine 5'-phosphate (XMP), the first committed and rate- limiting step in the de novo synthesis of guanine nucleotides, and therefore plays an important role in the regulation of cell growth
1461579.CCNK01000045_gene2273	1_1895	1.5e-294	1018.1	Pasteurellales	guaA	GO:0003674,GO:0003824,GO:0003921,GO:0003922,GO:0005488,GO:0005515,GO:0005575,GO:0005618,GO:0005622,GO:0005623,GO:0005737,GO:0005829,GO:0006139,GO:0006163,GO:0006164,GO:0006177,GO:0006725,GO:0006753,GO:0006793,GO:0006796,GO:0006807,GO:0008150,GO:0008152,GO:0009058,GO:0009116,GO:0009117,GO:0009119,GO:0009123,GO:0009124,GO:0009126,GO:0009127,GO:0009150,GO:0009152,GO:0009156,GO:0009161,GO:0009163,GO:…	6.3.5.2	ko:K01951	ko00230,ko00983,ko01100,map00230,map00983,map01100	M00050	R01230,R01231,R08244	RC00010,RC00204	F	Catalyzes the synthesis of GMP from XMP
339671.Asuc_0811	1_1946	5.5e-79	300.4	Pasteurellales	hpt	GO:0000287,GO:0003674,GO:0003824,GO:0004422,GO:0005488,GO:0005575,GO:0005622,GO:0005623,GO:0005737,GO:0005829,GO:0006139,GO:0006163,GO:0006164,GO:0006166,GO:0006177,GO:0006188,GO:0006725,GO:0006753,GO:0006793,GO:0006796,GO:0006807,GO:0008150,GO:0008152,GO:0009058,GO:0009116,GO:0009117,GO:0009119,GO:0009123,GO:0009124,GO:0009126,GO:0009127,GO:0009150,GO:0009152,GO:0009156,GO:0009161,GO:0009163,GO:…	2.4.2.8	ko:K00760	ko00230,ko00983,ko01100,ko01110,map00230,map00983,map01100,map01110		R00190,R01132,R01229,R02142,R08237,R08238,R08245	RC00063,RC00122	F	Belongs to the purine pyrimidine phosphoribosyltransferase family
339671.Asuc_0834	1_1950	1e-56	226.1	Pasteurellales	ndk	GO:0003674,GO:0003824,GO:0004550,GO:0005575,GO:0005622,GO:0005623,GO:0005737,GO:0005829,GO:0006139,GO:0006163,GO:0006165,GO:0006220,GO:0006725,GO:0006753,GO:0006793,GO:0006796,GO:0006807,GO:0008150,GO:0008152,GO:0009117,GO:0009132,GO:0009987,GO:0015949,GO:0016301,GO:0016310,GO:0016740,GO:0016772,GO:0016776,GO:0019205,GO:0019637,GO:0034641,GO:0044237,GO:0044238,GO:0044281,GO:0044424,GO:0044444,GO:…	2.7.4.6	ko:K00940	ko00230,ko00240,ko00983,ko01100,ko01110,ko01130,ko04016,map00230,map00240,map00983,map01100,map01110,map01130,map04016	M00049,M00050,M00052,M00053	R00124,R00139,R00156,R00330,R00570,R00722,R01137,R01857,R02093,R02326,R02331,R03530,R11894,R11895	RC00002	F	Major role in the synthesis of nucleoside triphosphates other than ATP. The ATP gamma phosphate is transferred to the NDP beta phosphate via a ping-pong mechanism, using a phosphorylated active-site intermediate
1121870.AUAA01000037_gene79	1_1978	2.5e-59	235	Chryseobacterium	cdd		2.4.2.2,3.5.4.5	ko:K00756,ko:K01489	ko00240,ko00983,ko01100,map00240,map00983,map01100		R01570,R01876,R01878,R02296,R02484,R02485,R08221	RC00063,RC00074,RC00514	F	This enzyme scavenges exogenous and endogenous cytidine and 2'-deoxycytidine for UMP synthesis
591023.AM202_04347	4_35	3.9e-81	307.8	Pasteurellales	ureX		2.5.1.18	ko:K00799	ko00480,ko00980,ko00982,ko00983,ko01524,ko05200,ko05204,ko05225,ko05418,map00480,map00980,map00982,map00983,map01524,map05200,map05204,map05225,map05418		R03522,R07002,R07003,R07004,R07023,R07024,R07025,R07026,R07069,R07070,R07083,R07084,R07091,R07092,R07093,R07094,R07100,R07113,R07116,R08280,R09409,R11905	RC00004,RC00069,RC00840,RC00948,RC01704,RC01705,RC01706,RC01758,RC01759,RC01765,RC01767,RC01769,RC02243,RC02527,RC02939,RC02940,RC02942,RC02943,RC02944	O	Glutathione S-transferase
