# Supplementary material for: Isolation and sequence-based characterization of a koala symbiont: Lonepinella koalarum
Source: PeerJ. 2020 Oct 20;8:e10177. doi: 10.7717/peerj.10177 (PMC7583611; doi:10.7717/peerj.10177)
Supplement: Supplemental Information 8 — A comparative genomic analysis was performed in Anvi’o version 5.5 to compare three publicly available Lonepinella koalarum genome assemblies to 55 closely related genomes. Gene clusters that could only be found in L. koalarum relative to the rest were filtered out and annotated with COG (Clusters of Orthologous Groups). This table contains the complete list of all 136 gene clusters that were unique to L. koalarum, including their translated amino acid sequences. [file peerj-08-10177-s008.xlsx]

## Sheet: Sheet1
gene_callers_id	max_num_paralogs	functional_homogeneity_index	geometric_homogeneity_index	COG_FUNCTION_ACC	COG_FUNCTION	COG_CATEGORY_ACC	COG_CATEGORY	aa_sequence
1517	1	1	1	COG3971	2-keto-4-pentenoate hydratase	Q	Q	MSLNLDAKTIEQAAASLRGATNTGRFITPLREQYPNMTLADAYAIQAANTQHAIQAGRRITGRKIGLTSVAVQKQLGVDQPDFGTLFDDLAFGDSQPIPFSLLHQPKVEAEIAFVLGRDLPHERPGFADVLGAIDYAVAAIEVVGSRIENWNIGLVDTVADNASFGAYVLGGTPYSMRGLDLRLAGMAMFRAGEPVSTGAGAACLGHPLNAVVWLARTMTELGTPLRAGDVVLSGALGPMAAVKPGERFEAHIEGLGSVRAVFENDNAEEK
1138	1	1	1	COG2828	2-Methylaconitate cis-trans-isomerase PrpF (2-methyl citrate pathway)	C	C	MVTQTAIPCMLMRGGTSKGPFFSFDDLPKDIETRNNVLLAALGSPDKRQIDGIGGAHSLTSKVGIVKISDLPNVDLEFLFAQLQPDSDSVNTNVNCGNMLAAVVPFALEKGLIKAQGETTTVRVLTQNTGVLADITVQTPNQTITYDGDAKIDGVPNTHAPIQIRFLDTEGSVCGSLLPTGNVYDEFDLAEFGKLPATCIDNGMPMVLVRAKDVHRTAYEKVAELNQDEQLKQILEQLRIQAGFKMNLGDVSDKNYPKMCLLSEPIQGGNVHTRCFIPHVCHEAIGVLAAVTIATACVIPDTVAYGFSDFNPKKPFSVEHPSGEFSVTLSFNSQGKVESAALLRTARLLMKGEVMISPKIWSQGE
1406	1	1	1	COG2084	3-hydroxyisobutyrate dehydrogenase or related beta-hydroxyacid dehydrogenase	I	I	MAHIAFIGLGQMGTPMATNLLHKGHHLRVYDINPTASEKLNALGAYVATSPKDAVLGCEFIITMLPNGKLVNDVIFGNNGAIESINRNSIVIDMSTIHPLESDDIRNRLRSENIEFMDVPVGRTSDHAISGTLLILAGGTKEQIEKASPILLCMGNKIVNTGGPGNGIRVKLINNFMSIALNALSAEATVLCESLNLPLEKALEVMEGTPANKGHFTTTWPNKVLKGDLTPSFMIDLAHKDLSLALDVANQLNVPLFMGAASREIYSQARATGRGKQDWTAILEHLRNCSGLKDD
495	1	1	1	COG0043	3-polyprenyl-4-hydroxybenzoate decarboxylase	H	H	MAEQTSKPNVYDLRSALALLETLPNELVSTDVEVDPIAELSGVYRYVGAGGTTPRPTKTNGPAMVFNKVKGYPNIRVAIGLNGSRKRVGAFLGCPPERLGFLLKESVEHAIPPVTLNSDVKPACQEVVHLASDPDFDLRTLLPAPTNTIEDAGPYFTMGLCYASDPDTGESDITIHRLCVQSKDELSMWLTPGRHIDAFRQKAEAAGKPLPISISIGVDPAIEVAACFEPPTTPLGYDELAIAGGLRGKAVEMSKCITINERAIAHAEVVIEGELLPDVRVREDQNSNTGKAMPEFPGYTGDAKPALPIIKVKAVTTRHNPILRTTVGPGQEHVNMAGIPTEASILDMVERAMPGRLLNVFAHTSGGGKLLAVMQFKKSAAVDEGRQRQAGLLAFSAFP…
2071	1	0.993817	1	COG1401	5-methylcytosine-specific restriction endonuclease McrBC, GTP-binding regulatory subunit McrB	V	V	MSIKNCFENILTNLNKQKQKEFKNNPMHTVFQRELKPEIERLVKEYDVSLLYKVNASIGNGNWADVPWLSILNTQITATTQSGIYPVYLFKADSSGIYLCLIQGSTALKENYKPKKNYLDEGQRRKNLLLSKYPELKSWNTHSIDLQSKTDLGKSYEDTTIASKYYPAENIPSDEELKQDLYFLLEIYQRMKQDILQLDQISFTPKNNDLFPDETMNTIHISATRIPKPFLILAGISGTGKTRFVREQAKMSKQGESDNYLLVPVRPDWHEPSDLLGYSSRLSGKDEYIITPFLKFMVQAWQEIAKYQADLNAEFSLETLQQIRPFWLCLDEMNLAPVEQYFADYLAILETREWKTQGNNFVYACDAILHQDLFTQFEKLAYDLGLEKDSALYRYFSQN…
2014	1	0.997114	1	COG4597	ABC-type amino acid transport system, permease component	E	E	MKKINFSLNDANTRSWLYQVIILSMIVYVVWYLVDNTLHNLATRNIQTGFAFLNKEAGFAIGESLIEYNLTDTYWHAIRVGILNTLLVSFVGIVLATLLGTIIGIARLSANWLVNKLAAIYVEVMRNIPLLIHLFFWYSLLTENLPGPRQALNPIDGVFLSNRGVKIPALSGDSVSWMLVGLLFAVIATIILSFWAKHKQNKTGKTTAVFSISLAFWVIFPMLAALLSGWQLDVVKPELKGFNFVNGWHFSPELAALLLGLVLYTAAFIAEIVRSGIQSVNKGQWEAGESLGLSRLKTLRLIIMPQAVRVMIPAMSNTFMNFTKNSSLAVAIGYPDIVSIVNTMLTQTGQAIEAVMIIMLAYFTISISIAVFMAWYNKRMALVER
2013	1	1	1	COG0834	ABC-type amino acid transport/signal transduction system, periplasmic component/domain	T|E	T|E	MKKLNVLTATVIATVGFTAFSANAQASTLDTVKQRGHVICGTTTGFAGFSAPDDKGEWKGLDIDLCKSVAAAVFGDATKFKTVPLNSQQRFTALQSGEIDVLTRNTTVTQQRDTALGLQSPGVNFYDGQGFLVKKDLGVKSAKELDGATICLQTGTSNENTLADWARASNVKYTPVVFDQFNEVVNAFASGRCDVFSTDASGLASIRISRLSNPDDYVVLPDLISKEPLAPFVRQGDAQWFNIVKWTLQAQFNAEELGVTSKNVDEQLKSENPNIQRLLGVAEGTGKNLGLDDKWAYNIVKQVGNYGESFDRNVGKDSPLQIPRGLNNLWTNGGLHYGLPVR
1160	1	0.993115	0.993139	COG1132	ABC-type multidrug transport system, ATPase and permease component	V	V	MVAAMWSILNPVKKQIYLAIFLAGLAVFANLLVLASLAWSVQALLSHPEQMPYALLSIALLSTVCAYVLRITAFNQSHYASFRLENHLRKQLAEHLAKVPLGYVENMGSGSLAKILMQDVKALHIFVADSTPLYARAYVSPVLTFMLLWWLDWRLSLATVAVLCLGLWLVFNAFSSSQALMQQYNQASENVSKAVVEYVQAMPVVRSFSTAEKSFERYQHALNRYKQVVLQWYRRTGILARLAQLIVSPLPTLTTLLWLGVWLLNQESLNLHHYLMVLLISAGMTESLLPLSSLKHLIGKTEMSVKRIQEVLAEPILPMTTQPQYPQDNSVVFDQVDFRYQQHSPLVLQQVSFTLKPNGITAIVGASGAGKSTVAKLIPRFWDVTSGSIRIGGVDVRHL…
2098	1	0.999155	1	COG1116	ABC-type nitrate/sulfonate/bicarbonate transport system, ATPase component	P	P	MTEQIVKEQVAIEIKNLSKHYQKENSQMTVLDNINLTINKGEFITIVGHSGCGKSTLLKMIAGMVNIDAGSIEVNQQPIEQSNEHCAMIFQESRLFPWLTVSENVGIGLKHLNKQEKYEKINTYLNLVGLKDFENAYPKALSGGMAQRAAIARGLVMNTDILLFDEPFGALDAMTKIQMQNEVLRIRQEEKKTMILVTHDIEEAVYLGDRVVVLSSRPGKIRDIVPIHIDGKKERTHDQFISYKNKIHDYFFEPHRDEIEFYI
2097	1	0.998084	1	COG0715	ABC-type nitrate/sulfonate/bicarbonate transport system, periplasmic component	P	P	MKKCNKQHYTLFFYLAILVVLAFGGINLDDKTSEKNTALSAHHEQKTVRIGFPGISNSTLEAGGIAINQQYFIEELAKVGFKPEIVFFQQAGPALNEALASDKIDVALYGDLPIAILRTKGAPVKVFAIDNSRLQFGTIVQSESPAKNIAALQGEKVIFGKGTVQQRYFKEITQFYGLNPDKFEMVNAVGADANSVFSGQQAEAMFTFYYTVLYMQQKGMGKVIDSTLDKPELSSQSLAVGREIFLQENPQAAVAIIRALQRAKQFASQNPEQVFKIFSQNNIPADIYRQAYSADLSFSNFDPKITQESVNKLSRLIDFLVENKLVNNRINVEELITTEYYERFLQEK
592	1	1	1	COG0600	ABC-type nitrate/sulfonate/bicarbonate transport system, permease component	P	P	MSKTTFNKWAISLAPWVLPVVLLIAWQLAVSSGWLSDRILPAPSTVVAAGWTLLQSGEIWHHLAISGQRAIIGFVIGGSIGLLLGFITGLSKWGERFIDSTVQMIRNVPHLALIPLVILWFGIDETAKVFLVALGTLFPIYINTYHGIRNVDTALVEMARSYGLKSFALFRQVILPGALPSILVGVRFALGLMWLTLIVAETISANSGIGYLAMNAREFLQTDVVVLAILLYAVLGKLADVAARSLERVWLRWHPAYQIKVGE
385	1	1	1	COG4166	ABC-type oligopeptide transport system, periplasmic component	E	E	MNRIKFSKLSITAIFSLICLSACEPNKSNSTQLHPTSPSVTPEQSSSYQADVLVRGVYDPFILQPAEIRQPEQSALLRDLFEGLVIYDPQGNIVAGMAESWESADQKTWIFHLRQNAKWSNGEDVTAQDFVRSWQNLALSDNPQKEFLLYMNMQNAKQVIEQSMPVQQLGVQVLDEHSLQIQLDKSTPYLPKMLAHIALLPSYQATPEQKKAFITNGAYSVVEQTADRIQLSQNPYYSNDHRRAFSKVIYQKIDVQHSSQPIDIIQNVKHKSDNINYFPQLCTYFYEFNFRHPILKQKAVRSALISMIPSDIVSQYPFVMPNGINYLPNNMQFEQQRDFEPTLVEQKLQQAGITEQNPLKLRLTYDNNGLHQQIAEHLIRGWSQSDLIRVQAEPVSYQT…
2016	1	1	1	COG1126	ABC-type polar amino acid transport system, ATPase component	E	E	MSKVMVQLKDVNKWYGDFHVLKNVNLTVTEGEKIVIAGPSGSGKSTLIRCINGLEHHQTGELTVNGVLLNNNLKHLEQIRHNVGMVFQHFNLFPHLTVLENLTLGQIWVLKKRKQDAIDLALKYLERVKIADQAYKYPGQLSGGQQQRVAIARSLCMSPKVMLFDEPTSALDPEMVKEVLDVMVELAEQERITMLCVTHEMGFAQRVADSVVFMDQGMIIEQTAPDEFFRQPKTERGQQFLAQIL
1058	1	1	1	COG4823	Abortive infection bacteriophage resistance protein	V	V	MTYPPQHFLKQWQDYDDLLQLLKQRHMQISDDNKAKQYLERIGYYRLSGYWYPFREINFDESNKQHKLVLKDSFKANTVFAQIIQLYVFDKKLRLLALDALERIEMAVRNDVVYLLGKQNPLAYQQAECLHGNFSKRLAKNKDKTAHQIWLEKLQAHIGRSHKHPAICHYREKYQGQLPIWVVAEVWDFGLLSHLFAGMKKQDQDIIAGKYGTTAKTLEKWLKSLNFIRNIAAHHARLWNVNILELSPTPPQWQNIPNEKPFLYFCIMQLLLNKICPNSTWSERFTALMADFPTLSNQAISLHAFGLLENWQDLAIWKKENQHVQQNC
1519	1	1	1	COG4569	Acetaldehyde dehydrogenase (acetylating)	Q	Q	MSEKKIKVAIIGSGNIGTDLLMKILRHGKHLEAAVLVGIDPNSDGLARAAKLGVATTYQGVQGLIEMNEFADIDIVFDATSATAHVKNDAALRAVKPNIRLIDLTPAAIGPYCVPVVNLEQHVNQQNVNMVTCGGQATIPMVAAVSQVTKVHYAEIVAAISSKSAGPGTRANIDEFTETTSKAIEVIGGAEKGKAMIVLNPAEPPVMMRDTVYTLSDLADEQAIRESVERMAAAVQSYVPGYRLKQQVQFEHLEKPVFIEGLGRVAGLKTSIFIEVEGAAHYLPAYAGNLDIMTSAALATAERMAQSLLNTEK
195	1	0.99888	1	COG4992	Acetylornithine/succinyldiaminopimelate/putrescine aminotransferase	E	E	MTKLSTQIIDQTEQYGATNYLPLPIVISKAKDIWVYDPEGNRYLDMLSAYSAVNQGHCHPKIIKALTEQAAKVTLTSRAFHNDQLGVWYEKICKLCNKSMALPMNTGAEAVETAVKAARRWGYDVKGVTDNQAEIIACVGNFHGRTMTAVSLSSEKSYQRGFGPLLGGIKLIPYGDLEALKQAITPNTVGFLVEPIQGEAGIVVPPQGFLKQAVTLCQQHNILFIADEIQAGLGRTGRLFACDWEDVVPDMYILGKALGGGVFPISCVVANRDILGVFTPGSHGSTFGGNPLACAVSIAALDVLQQENLIERSQQLGEYFLAGLQKINHPRIKQVRGRGLFIGVELHEAARPYCEQLKEKGLLCKETHDTVIRFAPPLTISQQDLDWALSRIREVLG
9	1	0.997738	1	COG1048	Aconitase A	C	C	MNNSKAKCIKQLSLQGKQYHYSGLAELDADKVAKLPFSIRILLENVLRNHDDFSITQEHIDTLLNWSPEPVDKDIPFKPARILMQDFTGVPAVVDMASLRTEYVRHGKDGEKINPAIPVDLVIDHSVQVDFFGTDAAYDKNVSLEFERNKERYELLKWAQKGLKNFTVVPPGMGICHQVNLEYLAQGVIARDGWLFPDTLVGTDSHTPMVNGIGVIAWGVGGIEAEAAMLGQPIFFTCPEVIGLKLTGSIPDHCTATDMVLSITKVLRDKGVVGKFVEVFGDGLDSLSVTDRATISNMSPEFGCTVTYFPIDDRTLEYMHETNRTPAQIELVEKYCKENLLWRTGREDITYSSVVEFDLNSLVPTVSGPKRPQDKVLVKNLGDTVTTLLDNEYHRQTLH…
1721	1	1	1	COG0318	Acyl-CoA synthetase (AMP-forming)/AMP-acid ligase II	I|Q	I|Q	MIWDYIKDKLLSVDLVNRHYELLFDGYNNLYECFYKIYLEQKDELFVVYDNEDFTYGNIYILIETICSNLERRYGNNKPLNVGVLLDSSVYYICFLLAINKMGWISILYPTKYGSYEINDLIKIIDIDLLISETNFNDVIDGLDKDVECLNFKDCLLECDLCVIKATSERYYNFLDIETLEKDAIIMFTSGTTSHSKASVIKNFNLVHAIETYKNIFQLSKYDSTLLATPIYNITGIVGIFSTIMSCGGIIYLHSKFNIDNLVDGLKRFKITYFHSSSVVLKKIIESSKSKVFNNIRLVACGSSMLSSNDINRIKAIMPNASIRVIYGLTESSSPGAIFPVDIYKHNKINSSGIAIPGLEIKIIDDYFRDVGFNTIGEIGIKGTNVITRYIPDNNELIN…
1057	1	0.983008	0.990139	COG2189	Adenine specific DNA methylase Mod	L	L	MEILDKSKTVQIMNSTAQHSTA---------------QHSTAQLTNLISKLKEIFQINQPDLDFGIYRILNSRSKEISQFLEKTLPEKIGNALGQNINQETAVYNHLYEFFSRYYDSGDFVSLRRYKGNTYAIPYAGEEVMLHWANKDQYYTKSGENFSNYAFYLADDKRVQFRLVEADTNKDNRKDNEQKRLFVLSEQPIEETAENLVIPFEYKALGKNDKQADYIDQAVEQLKSHPFANAVWQELFRLAPTEKDAKRTLLKKYLQDYTTKNTADYFIHKNLGAFLSGELDFYIKNEVMNLDDIQTETAFAEIEQNLQLIKIFKQVAQEIIAFLAQLEDFQKKLWLKKKFVTAVYYLITLDKLPDTLAEIALKNEQQIKQWQTLFNMDASGENLQNLR…
1023	1	1	1	COG0859	ADP-heptose:LPS heptosyltransferase	M	M	MSLFKNLLLACLPNRRKNPIHESVLHEVKSILFRPLGRAFGDACVHTAHLQQIRQIYPKAKIAVWVGPSNRAIFEACGVVDELIEIKIGNCFKQRKKWDLLLDFENNFNTSSLIMDLISAPKYLMIFRKYEKKHYHFNNVKHFDFNANLGEKVLFSKYVNQSILAKMATLNPAHSVVHTSPSNDEKMQKYWQSCVANNIVAKSINILLCLQGSSREVPAVEIAEILNKSITQPQFFQIVVSFTSAAERYQQELQALCPDLTIHLSPKTSAAEYFSLMKKADLVFAVNGGSLHLACAFDKPLLSFHANSEPTLSAWKPLLPANIPQCYLVARNPLRIHTGVDETYNFDTAKAIAWLKQFIQAQNLA
1373	1	1	1	COG1397	ADP-ribosylglycohydrolase	O	O	MSFCYSGVNMKNRIAGALYGQALGDAMGMPSELWSKKYIEEFFGGLITEMLDGPAENEVATNYIKGQFTDDTGQALVLLDSLASTNYIPNTKDVAQRLLEWSERENAFQNNILGPTTKLALTDFREGKNPSKVTNSALSNGSAMRIGPIGAMFYPEQKEKLVDYVYDLSCATHSSDIAIAGAAMIAVGVASAIVNDDFEKVVDDILAIEPIGYAKGAETFSPRLNERVKIGIEIARKYKEQDSIFLQKIYDIVGTGVQIIESVPAAISVAYYARNPNHSAFLCANMGGDTDTIGAMATAICGAFTGVSVIHSHYIEMLHKQNNINFNTYIDILIKGREKLK
311	1	0.995522	1	COG1454	Alcohol dehydrogenase, class IV	C	C	MTNATESLVLRTTFTTRNFHGWGCLSVLPDEVARLGAKNVLIITDPFLAQSGLAQQIVQTLQQIGVSSVVNSDVVAEPPLAVAEQLVQFARQQNADLVIGLGGGSALDLAKLVAVLATQDGNVADYLNLTGLKILSSQGLAKIMIPTTAGTGSEVTNISVLSLASSKDVVVHDYLLADSVIVDPQLTVSVPARVTAATGIDALTHAIEAYVSVNATPISEGLSLQAIKLIARSLDKAVKNGNDRQARIDMSYGSYLAGLAFFNAGCAAVHALAYPLGGQFHIAHGESNAVLLYYVMGYIRSACAEKLKDIYQAMGFDVANLSAEEASKKCIIALKELVNTVSIPATLQDFNIPQDALDALSNDAIKQTRLLQRSPMLLSLQDIQAIYQSAFNGKGFI
1408	1	1	1	COG1501	Alpha-glucosidase, glycosyl hydrolase family GH31	G	G	MKLNQIENGFELFYKQKSILCHTTQHPAFFVGIGEEKIASYRGNFQIEDRIIERLPLKYSTIKENTIYLSYDEKTPFQLKIQISPRSDRDLILTIQSMNPSLNRFWLRLVADENEKVWGGGEQMSYFNMKGRHFPLWTSEPGVGRDKTTEITFLSDKYHKAGGDYYHTNYPQPTFISSQHYACHINSTAYSEFDFRHTDYHELHSWEIPKSIEIYTGDTFLTIVEKLSLRFGRQPKLPEWIYNGVILGLKGGEKNSFSRLDNARAKGVPVAGIWCEDWAGVRQTSFGKRLFWDWKWNPKRYPNLAKKIKQLKQQNIRFLAYVSPYLCDDGELFPIAKEKGLFALNAQKEVALVDFGEFYCGVLDFTNPKTREWFKQEIIQKNMLDLGVSGWMADFGEYL…
1251	1	0.989148	1	COG3534|COG3534	Alpha-L-arabinofuranosidase|Alpha-L-arabinofuranosidase	G	G	MKNQCHNPYLPLYEHIPDAEPRVFNDRLYVFGSHDQENGNEFCELDYVAWSAPINDLSDWRYDGVIYRKQDDPDNQAGLPLYAPDVVQGKDRRFYLYYCVKFQDAICVAVCDTPAGKYQFYGKIQYPDGTIMSDNQPYDPSVICSEDGNFLYFGFAPCMINIPRYKGQDLKGGSVVELEDDMLTVKGKPQIVIPSLIYSKGTSFAGNEYFEAPSVRKINDKYYLIYSSVNTHQLCYAISYKPMQGFVFGGVIVSNGDVSYQGRSEQDKLMSVGNNHGGLVQIHDQWYIFYHRHTSLTQYNRQGCAEKIYFEPDGQIKQVTITTSGMNPMPLSGNAFYPAVYCCNLSNGRMGALTSLGRTNSEVDFPYITTENGERYITNVQDNNLIGYKYINLAETQDI…
1159	1	0.99791	1	COG2207	AraC-type DNA-binding domain and AraC-containing proteins	K	K	MHHLNKPLLLQPTKLPEHILQAIPQDWQQSLNIYSPCRDLTLHSVNASSRHPWLFQSEGEAALNLCFLLAGKMRTGFHDGGTYHVNAGSAVFMLSNQHTQGWNEFVSQQNHDFRMLNIHIPKSAIESLIGVEMSLLRQQSHSIFGHSGEQQHLDALMTCVPISLSLQSRISELLTSFQQTAPHQVIGNLYCRAKILELIALFLQENICQQTISLPVPCDRKRLMQARYLLEKEYAQDWCVADLAARVGLNEKRLQTGFKALYGKSVYAFLIHTRIQAAVILLQQGVSVTDTATMVGFSHLSHFSRVFREHIGVSPKQLV
48	1	0.995861	1	COG1074	ATP-dependent exoDNAse (exonuclease V) beta subunit (contains helicase and exonuclease domains)	L	L	MPKATALNANSTPLTHTTLIEASAGTGKTYTMASLYIRLLLQAGENNFSRPLSVEEILVVTFTEASTQELKERIRQRIHLCKKQLEQYRETQDKKAFADNQPLAELVDYIDDIDLAIQRLRLAEQNMDLAAIYTIHSFCRRVLTQYAFYSGIHFELELVKDETELLKRFANEFWREHFYSLPYECTDFIHRWLGSPSAVLNHIRQYVSGDPLKVAINSPQLLEHDLSEFLQQYVQNGLQQIQQLKQQWRESAVEIRQLIENETAKKYAKGEKKRLKRTSFKSNTVPNWLNQMESWADDVYQLDFPDCIKYFSQQNLNTDYVEEGAEPMTHVVFEQVDKVRNIDFTLYYHIVLYHYMQALNQKMTAYKLDHAEKSFDDLLRLLRDALYAKQGNELAHRIR…
47	1	0.995649	1	COG0507	ATP-dependent exoDNAse (exonuclease V), alpha subunit, helicase superfamily I	L	L	MLNLLFSLCQQQRISQADFYFAKLIADKQQGLGYSEQQQALAILVAGLCQYSLSQGNTCLFLDRDLANNYFGLRYIKTDDGIDYVAEINQKIANLPLHQWANMLQDHIAFTLSPQEKIAPLVLQHNALYFYRTWQDEYRLADYIKTAVQKPQDFLLPQVKACLARYFEQTTATTNWQKVAVAVALRQSFCLISGGPGTGKTYTVARLLAVLQKLHQGKLKIGLAAPTGKAAARLSESIEKELNSRSLQPLLIEDAIQHNMPSSAQTLHSLLGVRPFSEKTVYHAQNPLPYDVLIIDEASMIDLSLMNKVREALAPHCKLILLGDKDQLSSVEAGAILGELGQFMGLYFDPKRQKNIGCYDKEFTEYLTAVTGEILIASETSLSSIANCLCYLPDSRRFD…
1643	1	1	1	COG2723	Beta-glucosidase/6-phospho-beta-glucosidase/beta-galactosidase	G	G	MSKFPKDFLWGGATAANQIEGGWDEDGKGLAGSDMVAYVPKEIRGLKSAAIDVSSDRIDEILSGKFEGRFPKRHGIDFYHKYKDDIALFGEMGFKCFRISIHWARIFPNGYDEQPNEAGLKYYDDMFDEMHKHGIEPMVTLSHYETPLGLTQKYNGWLGREVIAHFVRYAKTVFNRYKGKVKYWLTFNEINMVTMHSAYCGAGVVLDRVEASQQESAKYQALHHQFLASSLATKALHEIDPNAKIGCMLARLHHYALTADPADQRQAQWGNQQNLFFTDVHARGEYPKYMLRHWAENNVQIQKEVGDDEILKQHTVDYISFSYYMSLAVTTHPQEDGDIGGNLLHGVKNPYLKASDWGWQIDPVGLRITLNDMYDRYQKPLFIVENGLGAYDQVENGKI…
815	1	0.955754	0.997763	COG3659	Carbohydrate-selective porin OprB	M	M	MKINTSKLMQGLCYSMLMLGATTTVQAETETQKPLSDVGNWLEQHGIKPHLMSSYLYFDNFDMGIQKGKNEQLVIVMAGFDADLQKLASIKGGHLHFSYAWAPYHKNFDFGFQAGDILVGNPPPYIPKVAHLTKLTYEQKLFDDRLSIEVGRSNPGFYYGKSLCNFEFSCVNPLLHKTATFSPVIYSAWGGRVAYNLSPSLELSASGWRTYQDFPFTNGWESGWNDKHATGNLWLASLARKEEWRNSQSKYPLTWELTFFHNTHRFVDVDPLVTDKKQLSGTTGMHAGVKKLFWRLDGGSETHPSATTLSAYASVSRMFDDVTYGGLSTFASTGVILSGPFKSRPMDSYGLNFNWAKVTNGQQRAMTAGYAGMENWHARKNQYQLSLDATIPALPFLIM…
1526	1	0.993669	0.994313	COG0346|COG0346	Catechol 2,3-dioxygenase or other lactoylglutathione lyase family enzyme|Catechol 2,3-dioxygenase or other lactoylglutathione lyase family enzyme	Q	Q	MNTTFSQNTLPPEPIFDIASISAFELFSPNVDETVWFFKDLLGMIETGRDGESVYLRGWQDPYKHSLKVTYRDQPGMGYTAWRTTSPQALERRVKSIESSGLGRGWVEPEGGIGRAYEFTLPDGAVLRIHWDVEYYRPEQEEKSVVLNRIQRRPLRGIPVRRLDHINILSHNVSENHHFLREHLGLKLSEHIVFSDNTEVAAWLRCMHRSHDIALVQDAAGPGGRLHHVAFLYGNTQHLMDICEVVTDCGLEMEAGPASHAVSQAQFVYVLEPGGNRIELVGVPGYIIEDPAWEPVLWSQDQLDNAIIWYGAPLPKEFDTYGTPHYGPTNYRTPNRYIAAEAVHLLGGKEQ
1025	1	1	1	COG3087	Cell division protein FtsN	D	D	MAQRDYAARSGSKKKKSANKSRLLAIAIGVVVAFVLALYLLKEKAPEPVKQNTPSVVSEAKDKHKSQLPSKLEETFSYIKELESRSITNSQPAQLSEAQKAELKRLQEEEQARQAALEKLKQTESTNMTMTPNAGVQVVDAKLTDSATESAVSDEAKLTAEQERKVAEQKKLADQRKKEEERKLAEQKKAESKKVDSAKSAGKFGLQCGAFNDRAKAESLQARLAMAGLNARITESGKWNRVLIGPIGDRPAAASAQQQASAIAGCVIIGM
1965	1	1	1	COG3115	Cell division protein ZipA, interacts with FtsZ	D	D	MDLNTILIILGILALIGLVAHGIWSNRREKSQYFNHANNFNRGQHIQRKPEQSLTDYAQAPVTPMQKHQPIASQPVKNTKMNIPQPEPIQTDTPVAAPVQANSVEQIKITLPESGTAQPESEQVYYEYRPEPKQPKENMAEYTLADALDYAGTDAQVDMSSPELRVQLQEVSSPISEPKLQQPIENNTEQAVQEPVTQEQQPTDFILLYVVAPENRQFLGLSIAQSLDNLGFILGKDNLYHRHVDTVASPVMFSVANIEQPGTFNPYAMNEFSTIGLALFMQVPSQVGNDKANLKMMIQAAKNLAEELNGFVLTDQQAIFDDKQEQDYLDRV
845	1	0.997446	1	COG3061|COG3266	Cell envelope opacity-associated protein A (function unknown)|Cell division protein DamX, binds to the septal ring, contains C-terminal SPOR domain	S|D	S|D	MENTPKNNSNQSELDLGINQTDSILSKVTGLFNKKETLQPNQFAVRKEPTFGTQPNTTATNPVNTTQNAKQPVSDTPKTIPPQQPTITDPIQPTSVQTETVQVANTAETINTVAHTAGPVMSETVQEQTVVPPTQSKPNQKNPENWAIMQKLPPKHRRLFIAIAGVIAILLALLWLKPSNNTIEEIQANNSSSTPIEFQSLDPNKPLENSAVINNVEAETATAQTDNITTPEVTTPTADQAQQNTVPSPVVTPVPVKPVDTQATEQAYQAEQAKIAAEQAQARKAEQAKIAAEQEQARKAEQAKVATQPARKAEQAKQPTNKVAPVVDAKPAGTSVQTHQSNRNSSTQTTASSNSTRTLVIPQNTSLFQVFRNNDLDIRDANAMTKANGAGNVLSSFKA…
2379	1	1	1	COG1917	Cupin domain protein related to quercetin dioxygenase	R	R	MKKVLSLLAITTFALAHQAIAQESSPTTVKIETGTQAGKVLTEKGRVFVNQSGTVVHGFFKAGDKMKRHNHDGYELFFTVLKGKANIVLDDKETHPINAGEILYFNGKHFINADFPEETEVLISLIKE
818	1	0.998911	1	COG2807	Cyanate permease	P	P	MQSVKTRRSRMKWVMFFAFLTLSLNLRAPITSLPPVISEIKASLAMSPVFAGVLTTIPVLCFGLFTPFASKIIGKMGIENSVMLSLMGVTLGSILRAVGDTGFMLSGTIIIGLSLTIGNLLGLLIIARDFKSNASFMTGMMVLGMSLGGMITSSLTVPMSHLLDWRWALASWSLLALLSLFLWIPRYRREKAKNDRLAIRIEESAVKKSTISLSQFSREHVSAIIALTVSFSCHCFAFYGVVAWLPSFLVEFAQMSSDKAGVVVSIFHLLGFIGCLGMPLLGKWFKLSQKWLFIIDGLAWFLVPVGFYLLPDWWLLWDIMGGIGCGGAYVVIFSLIISKSSSLEENRYTSSVVQSIGYVMASLSPMIIGGLYQLSGAWLVSFVVLAITTLIFLIGGLLA…
2004	1	0.997205	1	COG0295	Cytidine deaminase	F	F	MKKQLNINYESFESYNELNDIEQKLFNVAKQARKKAYAPYSHFLVGSAVLLENGEIIAGNNQENAAYPSGLCAERTAIYWASANYPKQKILKIFVVGAPQDEMKNSPVPPCGACRQSILEYETKQSQNIEIYFSSVSGEIFKTYSIKDLLPFNFDVSFL
1462	1	0.992449	1	COG3381	Cytoplasmic chaperone TorD involved in molybdoenzyme TorA maturation	O	O	MQTELLTQINIASKMLGALLYYSPDDAKVRSILAFFQQADWAKEWQQATGVATNSTSVSHIEQGLQRTDEELVQQYQMLFIGPNTLLAPPWGSVYLDPEAVIFGSSLLTLRQFLRQHRINFIAPSEEPEDHIGLMLMLTAYLAEQQPELLAEYLTEHLLPWSTRYFELLASSDSLFYQGVAQLCQQTLSYWQQQLGLTTNKVRLFF
2123	1	1	1	COG1426	Cytoskeletal protein RodZ, contains Xre-like HTH and DUF4115 domains	D	D	MDTQINSAERITVGETFRQARQKLNLTIEQAAEKVNLRPIVVESIENNEFVQKNIPATFMKGYVRNYAEFLKLPDSLWKDGAIDFGGVVRNDLNKHVKVKKVVNPHSSHGRWVGWLTALVLLFVIGMTALWWWENYQQTNSERDNLVQNYVSTEGQNKALEHSDHVATMTETTIVDSAQANAQIVESAVQNNPENNSNAMTSTAINPQEKENTTESVDSPAQGILMQHSVNDNVDTTDSIATDNHTQNTVDNPVSGDLQIEVTTATSWIAVRDAKRHNLVAQKEYKQGEVITLDGKGPYALTIGAPANVKITYKGENYPLKIDGRVARIKLP
72	1	1	1	COG0019	Diaminopimelate decarboxylase	E	E	MKISQYFTQQKWQKLLQAGEQKQTPYLVIDLAYIKEKYAEMISLFPKAKIHYAMKASPAVEVVSLLADLGSNFDCASIYELDRVLGCGVEPERISYGNTIKKPAHVQYAYEKGIRLYATDSKADLKNIAQYAPGSKIFVRILVQGSDTAEWPLSRKFGCHPDMAVDLLVQAQKLGLEPYGISFHVGSQQKDVAAWDDALAKVKYMFDWMKYEEDIKLKMINLGGGFPTNYLSEVNPIKIYAQEIHRYLQEDYDEDEMPDIILEPGRSLVGGSGVLVSEVVLISRKSRTDLTRWVYLDVGLFGGLIETLGEAIKYPIYTPKMETENEQGTVILAGPTCDSTDIMYENAGYKLPQNLEVGDKVYWLTTGAYTNSYSSVEFNGFPPLTVIYTDTDKE
1182	1	0.998493	1	COG0412	Dienelactone hydrolase	Q	Q	MNNINKDQLNPEIFKLYNDYAHSRMTKREFLNKLSVYAVGGLTVANLINFLLPNYAMAIQVPESDNRLKVQTIQYDSPQGGGKISAQLAMPSNIQGKLGAVVVVHENRGLNPYIADVGRRAALAGFITLAPDALSPLGGYPGDDDKGREMQASRDRDEMLRDFLAAITYLQQHPQSNGKVGIVGFCFGGWVSNMAAAEVPDLAAAVPYYGRQAPLEVVPQINAPLLLHFAEHDDGVNSGWSDYEQALQQHNKRYLAYHYAGTNHGFHNDSTPRFDKAAAELSWQRTLAFLGEHLR
1515	1	1	1	COG0329	Dihydrodipicolinate synthase/N-acetylneuraminate lyase	E|M	E|M	MIFEGVNSPVITIMTDDGKIDYPNMGKHINRLINAGLNGLLFFGSLGEFYGISLAEKKEFIDWVVKVVNKRTQVIIGIGDTSLDNVLDLARYSEKAGVDALNIVSTYYFGLNEQSTVSYFAKVAEAVKLPIMLYNFPDRTGNDLTPELVCELAEKYPNIIGIKDTVDNISHTRRLCQKIKPIRPDFSILSGFDEYYLVNRISGGDGVLCGLTNVIPEDFVQFHKAFEAKDFVTMEKMGKKISYLMQLYQITPLFIVAIKSAVKISSGLDMSLYTKAPASPLTKEQEEKIKTILLEAN
1513	1	1	1	COG0129	Dihydroxyacid dehydratase/phosphogluconate dehydratase	G|E	G|E	MSIETLFSNQDPKIFNARTHADGPNGKLPLTPEFLRSAPSGNIFGMTVNAGMGWNPDTLANGDFMIISTQGGIRRDNGTTTAVGLHNGHFELGLLMSEAADVIKQMGGVPHAAFVTDPCDGRSQGTIGMFDSLPYRNDAAIVMRRLIRSLPTRKAVIGVASCDKGLPAMMMALAGQKNDTTILIPGGATLAPNNGEDLGTVQTIGVRYANNEISFDYATRVGCSACASAGGGCQFFGTAGTSQVIAESLGLSLTHSALAPSGEEIWYEIARNSATAALELVVKGIKTKDILTDKAIENAMVLHAAFGGSTNLLLHLPAIAHAAGLKMPQVADWSKVNKEVPRLVSVLPIGPVNYPTVYGFMAGGVPEVMLHLRKLGLLHEDVLTVTGSRLGENLDWWEQ…
45	1	0.999064	1	COG3104	Dipeptide/tripeptide permease	E	E	MQQKTFFGHPYALSSIFHIELWERFSFYGMKAILFLYLYYEYSQGGLGIDKNIAGGIVGAYGGSVYLSCLVGGWVADRVLGAERTLFYSGIVVMCGHIILALVPGLEGLILGMICIALGSGGVKTTASATLGTLYETDDTRHMRDAGFSIFYIAINIGALLGPLLSGILQHSYGFHYGFGAAAVGMAFGLWMYSRGRKNLPPSPVPNPLNKKEQKQASFSWLALIAIVMVTIFSGFLTLQNFPRILLVCVICLTIGYFARLLMSHQVENKGNIVAFIPLFITISIFWSLWAQFDTAMILYFEQTIDRHFFNFEVPVAWLGSLQSLWVILIAGLLATLWTKMGDKQPKTPLKFAISMLALGVTYFAFSLMVSAQGSSFLLFFFFILLITISELLLSPVSL…
793	1	1	1	COG0863|COG1092	DNA modification methylase|23S rRNA G2069 N7-methylase RlmK or C1962 C5-methylase RlmI	J|L	J|L	MEQLSCQLFHSDCQIIMRDLANKNQQVDHIITDPPYAISQHNNFHTLNNPRKGVDFGTWDWGFDPAFWLESAYPLLASNGSMIIFCSYRFISQITHKIESLGGVVKDIMVWQKANPMPRNIHRRYVQDMEFIIWAVKSKKSKWVFNKPEDKPYQRGFFQTPTLLGKERTAHPTQKPIRLMHEIIKIHTHPGQLIFDPFMGVGSTGVASLDLNRRFLGCEQDLQWFELAQIRLNLG
1404	1	1	1	COG1349	DNA-binding transcriptional regulator of sugar metabolism, DeoR/GlpR family	G|K	G|K	MTINTIKYTELTGNPRHDKLISLVQSNGYISNEELAHTLGVTTQTIRRDIKTLSQNGFISRHHGGAGRVSSITNTEFSIRETIHTEEKTLIANEISNYILDGSTLFITIGTTVEFIARALESKNNLRIITNSLRVANLLYINKNFEVITVGGMLRSHNGGIIGPNVVSFINHFRADYLITSLGAIANDGTLLDFDINEVAVVKAMLHNSKKVLIAADHSKFHTSAAVEIDTLRNNMVLFTDEKPPTEIMRIIREKKVELHTVKKHI
1662	1	0.952502	1	COG2944	DNA-binding transcriptional regulator YiaG, XRE-type HTH domain	K	K	MKCIECDSGEYIHDVRDMPYIYKGKKTVIPAVSGRYCSHCDAVLVDNVDAQRVSEAMIEFNKQVNATLADPLYIQRVRKKLKLDQRQASQIFGGGVTAFSRYETGKATPPVALVKLLKILDKHPDLLAEVV
1192	1	1	1	COG1309	DNA-binding transcriptional regulator, AcrR family	K	K	MTASKTDLRIIRSHKLIRQGLIELLNQKSYHDINVQDILDAAMVNRSTFYTYYSGKDDLVGQMILDLKTEIKQLIEQRQQAENLEHFFEIAMPKWYELRHLLLALWKVYTPRHHLFDDMVKMFQQSFIQLAQGKSVSEQDLPLQSLLFAHSFLTAIRFFFEKDEKPNAKKIMTLWQNTLDIASEKKG
1370	1	1	1	COG2188	DNA-binding transcriptional regulator, GntR family	K	K	MTKYEQIINDIKNKITRREYTENQVLPSEKEMCEYYSVSRITVRKAVNDLVNEGILYRVGRKGCFVKESANTKLSHVYSFTDAILNQGKIPTKRQLSFSKEKAGVTYAKLLGITEDESVYVIKSLYFANNQPYCINTSVLPESLFPKLEYFNFNDRSLYDVLKHFYHLHIVRKTQYITAIKGTEDIDTLLEIKNSNVPLLRVKATTFCIIDGVEKAFEYYDAYLTDILYYYVE
1512	1	1	1	COG1414	DNA-binding transcriptional regulator, IclR family	K	K	MYHKPTERVLSVFTHLANWREGRTLTDLANSLNIPKSTISPILQEMVYQNYLYLDNQTNKYHIGITTHAIASYYDPLQEIFTHIQREMKNITAKTNEICQLGILEGPNVLYIAKEEPTSNLEIQIISYVGKLIPAYCTALGKSLLAGYDISQLKDLYPNGLLAQTENTITDINKLKKQLDNFSVENIFYEEEEVTPYLCCYATPINLHNNQRIALSISLPVFRVNETKKTLIKKLLLQAREKFNVINKELSV
309	1	1	1	COG1609	DNA-binding transcriptional regulator, LacI/PurR family	K	K	MPSSKDVAKKAGVSQATVSRVLNYPELVKEKTREKILKAIDELGYIPDANARSLVSKKTYAISLISGPLSNPFYVDTTTHIVNYATSLGYKVNVHFSTVENAKSIYELALSHKIDGLIMSCVLLNDPIVEQLQKLGLPFVSFNRRHNNVGQFVEIDNFAAGVQALQHLLDYGHKDILWIGASDIVSTFKNRFLGFKQGLKQLKKQEIKVRSINYKHLDRPDLKKLLQRLHQSGKLPTAICAATDAIAIDAMDVLVSLGLKVPQDISVIGIDNVELSQNHLIQLTTVGNKDNLCLGLMAIKKLIEMIETEPNAQDDFRITLPVSLFLRGSTQKI
1137	1	1	1	COG0583	DNA-binding transcriptional regulator, LysR family	K	K	MDLKQLKYFIKVAELGSYTKAAEQFNVAQPLLSRQIRQLEVELKQNLFIRNGRGVCTTEAGNILLKHSYAIFAQLDNLQEDLNLAQGKISGTITLGIPPTLSKLFAKNIIRRFYSQLPEANLVVVEAFTANLQERITNNRLNVALLHNPPFQSGIDYDLLTQVQLELITRKDNPLAQKSQIELDDFQQIPLILPTQGNTFRQLFDNEMTKLHRKSNVVLEVDSKELVLDLVEDGLGNSILLPMVLALGQAHPQLTAVKIAQPQLPCHLYMATANKTKPSRLQTALVKIIKDVCLCYFPNSNSKNI
696	1	1	1	COG1695	DNA-binding transcriptional regulator, PadR family	K	K	MNTTKKFTGKRTLKYAILGLLSRQPMTGYDITCEFQQAIGQFWQAKHSQIYPELKKLLIENLISQQIEMKGELEKKCYQLTELGKQALEQWLCQLDEIESEKDVFALRLYFLHAMPKTQLSTLFTHQLEQKQARLAFLHQQLATHFSENFDVITLNDNDFAHYLVLSKAIAREQSYYDWLVRSWQKVLRRQA
1573	1	1	1	COG0251	Enamine deaminase RidA, house cleaning of reactive enamine intermediates, YjgF/YER057c/UK114 family	V	V	MMDTQKIQATLDSIGEWYDRDITEPNFDLQLSLYCKMAALELCGWLEEVYDNVIISFLHRKGLSEKEIENFEKSYVRKVHGLSYSEHFRRLMIDTLGYTVVLDIESKTPKLEALISNLDTLHKYRNCMAHRQYFDYREKIPIKAQQQIISPSGIKSIFEAINPILKEIVDKIDIL
2005	1	0.99783	1	COG2382	Enterochelin esterase or related enzyme	P	P	MMKKITALLLMSMSTFAYSQSISLQNGDFVKGEFTVTDKDGADLAVVFADKSERRLVQNVVGKKEFVFKAEQTGTADFVIYSSQGKKAEIQQDQIQILQQIPVEKQNALPTKYLSTKIQQLAEQITEQNKTALLDEFWQQVTKQGTPLIEPVENTDENVVTFLWRGAKHNVWLWGSPSREDHHDQLERLFDSDIWFKSYQLPNDSLVSYGFAPDVPTLPVSQGEQRRAMLATLQADPFNPHTYPAKPKYPQDRFSYESVLKLKNTPQSPWLEAQSVAQGTLQSYSFHSQILGNERHIRIYLPTHFNPNNPDLHLLFLFDGAEYVAKVATPTILDNLIAQGKIPPTVAVFIDNPTTQARRTELPPNPNFANMLATELYPWVSQQLGIKIAAKHTALAGSS…
1134	1	1	1	COG3312	FoF1-type ATP synthase assembly protein I	C	C	MSAVLQRAQKLYKKVYLIEIIVLIAIFGILFLYNNDFAYAFSIGFLVIFVPSVFVIYIAFFVKKGKPIDITLFYRLEAIKFLFAIILIVISIKYLITNNILVFFIGFFVALALNSLLPFILNIFKQRN
234	1	0.996244	1	COG3301	Formate-dependent nitrite reductase, membrane component NrfD	P	P	MINEILVEPQHVAWLPWAASYFFFIGLAATAVAGAVMMRYVKQASSQQELIAVAVALTCAIVAPIALTADLHQPTRVWHFYTVLTYWSLMWWGAYILPFFTMTVAAYFLLLFYQVKQPMTAKLAARLTIWLHWVRGLVLISVAAILFYTCMEVYQVQARPLWHNPWFAPLIIFSALPTSMLLIQWTVKLRTQQNLAYLRHWALFSLTLFILALIGLCTASGDIADQLTQLYQQKTLPIFTAVFALVIAGWLLLPPFRFSLGLSVIFALIFTGMVRWVLFIQVQTLAKYNALANPYHFEWNADGGLGMLSMLGLWALVSVLMWQLLNMTKTPTEQKMATLNKLHSTPHNTQTGVLS
1410	1	1	1	COG2017	Galactose mutarotase or related enzyme	G	G	MLRYTVMNIKIETFGQVNGERVDLIHLSNQNGMLVKITNYGCIVTSIETQDCQGHFKDIVLGFDTLNEYLQGHPFFGAVVGRYANRINHGLFKIKDQIYQLEKNELSTSQHIHGGSVGFDKYIWNYSIEKNETLIMIHFYRLSPNGESGYPGNLNITHSIGLDEQNQLHFYFTATTDQTTIINLTNHSYYNLSGHDQGYICHHYLKIFSDYYTPVAQNMIPTGEILSVKHTGLDFRKAIKIGDNMDKLKDKTLDHNFILNGEVAYDEYHKAAELYDPESGRFLTVITTQPAIQVYNAAKLSNKCWMGKNQYKYESFAAICLETQHFPDSPNHRHFPNTLLEPDQIYKQKTIYQFSVKDNQG
1593	1	1	1	COG0625	Glutathione S-transferase	O	O	MKLKLHYLDRSRAMRVTWLLEHIGLPYELIPHKRQENMHAPEALKDIHPLGKAPLLEIDGKVITESVAMVEWIIANHAPQLAPATDSPEYADYLQWLQFSESTAMIPLVLKFIAAREPTPPQNTLAYADSEIEKVYDYVNRQLANKRYIMGDKLTGADFALAFSLIFMKMVYQGKFTHIDRYLADLNQLPSWQKAQQIEQQVLQGK
2130	1	0.991376	1	COG0435	Glutathionyl-hydroquinone reductase	C	C	MTTTPRYRPSEIENEVDEKGYFHRQKNRFTASFGEDANQNPIESGRYRLIWAETCHWSNRAAIVIELLGLEKAISVNKVGINSGFSREKSLGWEFIYDENHHDPVLGVQYLSELYYNADPNYQGRPTVPALVDITTKKVVNNDYTWLTNYLERDFKAFHKAHAPDLYPEHLRQQIDEFNNFLFDNVNNAVYKAMFAQSIDAYNDAYNSLYCALDLIEQRLETKRFLFGDFVTDADIRLFVTLARFDAGYAKNLGPLRNRIVDFKNIWGYARDLYEIPAFKHNTYFKTFAKKQGDRSGVFIDYYTRFWDKIDYEALWSEPHQRQTLSQTPDEKFIY
763	1	0.998745	1	COG0371	Glycerol dehydrogenase or related enzyme, iron-containing ADH family	C	C	MDLRSISRGIGQFICSQGALSMLNAKLTSFVNPVFLTGQKAYAAFSSFYQSEKDYPCYFYDGSCSHENIEYLANSLPIDCDCIVAIGGGKLIDTAKSVANRLNVEYITVPTLLSTCAAYTPLSIIYQSDGRIKQGEHYERAAYLCLADLDLLVHSPKSYLLDGIGDTLAKWYEANAAVANLTDDVPVFVQAALQMAKLIQQVLLNETDAAIASLTSHQVTPAFKHIVETIIGLGGMVGGLAGRKARVAGAHAIHDGMSQFPQTHQYGHGIKVAYGILVQLAAEKKMTEIEELLPFFTKYQFIHRLQDFGIHENLTEVMQQIAEIACGDGQTFRLAVPNCTVAQVVEAMQYVENL
1514	1	1	1	COG2610	H+/gluconate symporter or related permease	R|G	R|G	MPLLITAIAVVILILLISIWKMNTFIALIIVSAGAALAFGIPVEKVAATIESGIGGTLGHIALIFGLGAMLGRLVADAGGAQRIALTLINKFGEQKIQWAIFIASFIVGIAMFFEVGLVLLIPIVFSVAREMRVNPLYLGISMLSALLATHCFLPPHPGPTVIAGEYGADLGSVLTYGCIIAIPIVIICGPLFTKISQKIIPSAFEKVGDITALGTQKTFKDNEMPGFGVSLLTSMLPVILMMIATFASGIFSKGSFISNTISFIGNPSIAMLISILLAMYTMGIARNISIKDIMGSCYASISAIGMMLLIIGGGGAFKQVLIVGGVGNYIGELFVGTSLSPILLAWGVAAILRIALGSATVAALSTAGLVVPILSNYDVNLALVTLATGAGSSIASHV…
365	1	0.993528	1	COG3230	Heme oxygenase	P	P	MTQQQKTFSERLKAANRITHDSVDNLVMSVEPFKNNENYAKFLQLQSVFHKVVDGIYKDPALNKKIPELEYMARYDAVVKDLEVLNSQPYEFKGNLPTPQGNAAVGWLYCAEGSNLGAAFLYKAAEKKLNFDAEHGASHLAGHPEGRGKHWREFKVYLDNLGLDPKAEDEAIQGAKDAFAFYKVVLREVFGLPEGYESPNQGFVHP
1053	1	1	1	COG0672	High-affinity Fe2+/Pb2+ permease	P	P	MKMTIWVKPFLKPFKLSLLLGLCFSTSAYAKVELGALFVHLSDALSAVKKENSEQAKNDLRTLQQEFNAIPTHNSEAGKETSKALETAIANPTLANVEQISKDLYAFEQEQNPVDHDKNRQKFAEQVLPTLQDLEQVFASKNIEQIRTKFHRFGATWGANELSMRGASLSHYGKMETAMSLFRSAMQANPANYEQMEQQLAILKNTVDDFIGNSKAAQ
2111	1	1	1	COG0561	Hydroxymethylpyrimidine pyrophosphatase and other HAD family phosphatases	R|H	R|H	MKIFVFDIDGTISKNGLKVSDEICDAMAHLLVKHRVIFASARPIRDMLPMLNRKITEHSNTILVGCNGGMAYQQGNFILTKFLEKPYVENCLLRLKALNLPYVLDGKWAFSLSEKEHNFHHYISSLSHARLDEVDLLHDGVSKILVLLDKANQEIYTQFNHDNISFHIHKKENFFDITPHGNNKYNTLKQLIGKQKYVAFGNDFNDFLMLKNAKTSVYLGDKQEIETDYYLDDVDLVGEFLYQHFL
1051	1	1	1	COG2822	Iron uptake system EfeUOB, periplasmic (or lipoprotein) component EfeO/EfeM	P	P	MRLKFIAALISSLLLSTPAMAADLSKETKDYKDFVVAQIDELVTHTESFVDALKAGDVEKAKAIYPQARMYYERSEPIAESFGDLDPRIDARLADLEEEGKGEKDWSGFHKIEKVLWEQNTTKGTEETADQLLKDVKELRAKIPTAEVTPELMITGAVDLLNEVSTSKVTGEEDIFSKTDLYDFKANIEGAEKIYELFKPELLKKDAKLSAKIEQHFKEVNDLLQTYNRSTSGYDYVPYNTLTEKDTKALAEAVNKLGEPLAQLGVLLEK
1520	1	0.984833	1	COG0119	Isopropylmalate/homocitrate/citramalate synthases	E	E	MSTEKLYISDVTLRDGSHAVRHQYSIEQVQQIAKALDEAKVDSIEIAHGDGLQGSSFNYGFAAHTDLEWIEAAADVLTHSRITTLLLPGIGTVHDLKNAYQAGARVVRVATHCTEADVSKQHLEYARELGMDPVGFLMMSHMTTPEKLAQQAKLMENYGASCVYVVDSGGAMHMDDIRQRVRAFRDVLNPETQIGIHTHNNMGLGVANAVVAVEEGCQRVDASLTGMGAGAGNAPLEIFIAVAERMGWNHGCDLYRLMDAADDLVRPLQDRPVRVDRETLALGYAGVYSSFLRHAERAAKQYGLKTMDILIELGKRHMVGGQEDMIVDVALDLLKNR
1204	1	1	1	COG2220	L-ascorbate metabolism protein UlaG, beta-lactamase superfamily	G	G	MRKLFQCVKKMSALFASLLLGAVACSNLYPAFGGSPDEQSRAKINKSPNFDGKTFVNLEPTPTGFQKAANGEETSWLKRIFEIAFPPDGKQPSEPLPSLKLDTTQIENGSFTWLGHSTVLFKLNDKILITDPVFHRASPIFFGGKPFTMTYTPSVADLPAIDAVIISHDHYDHLDYQAIQEINPKTTHFYVPLGVKGHLQRWGVPDEKITELDWYEHAQLDQLHITLTPSRHFSGRGLTNRNTTLWGSWVIKSPLLTVFFNGDGGYGQHYKLLGEKYGPFDIALIENGAYDDHWPLIHMTPEQSVQATVDLKAKVVLPIHWAKFDLANHNWRDPIQRFLTAAEKQDFQTVTPKIGQTFTLNKLPQEDWWSVVK
577	1	0.997282	1	COG0252	L-asparaginase/archaeal Glu-tRNAGln amidotransferase subunit D	J|U	J|U	MRNKRLLIIHTGGTISMSEDENGKVSPTPHNPLLHNLERLNHPAQLSQENLFNLPSPHINLSHWLKIKARVEQAINLEKFDGVVITHGTDTLEETAYFLDLSLTLHVDTPVTITGALRSSNELGSDGLLNLQNAIVVALSEQSRGRGVLVAMNDEIHHAKFVTKTHTTNVATFQTPTLGPCGLITKSGVLYFQHLTEYERYPVEHITKSNIQLIKAYAGMDSFLLEQLAQYGCDGVVIEALGAGNLPPSCLAGIEALQCANIPIVLVSRAFNGITQNLYDYPGGGKQLKQQGIIFTSGLNGQKARIKLLVLLNQKQPFSTLLDYFNR
264	1	0.980192	0.989818	COG3765	LPS O-antigen chain length determinant protein, WzzB/FepE family	M	M	MSNDLSINRKDDEIDLVELFRSLWDKKLWIILSTLIFTLIAGIYAFTAKEQWTSKAEIIPPKVLDLGDYFIIRREYARILGAEFDSGALGNALYSNFNQFIYSVDERLNFLKDSELFKTLSANKTKEQQVEILSTLATENISITKPDAKKNPDAIGNQINLSAETPELAQKTLFQLINTINQKVLQLELDSFNVWFNEKITDLNFEKEKIEWDLITNENVHLEHLNKAYETAGKAGIKEYSQFGNDTFAGAQNVVVSDAKVPYQFMLGEKYLKAQIDVENEKGIIYPARYYEIQKQLGQLQPLAEKLKTAKAQSFHYLSSP-YPVIKDKPKRVLILLIGVLLGGILSCLVVLVRKAFGK
1623	1	0.943182	0.919318	COG1388	LysM repeat	M	M	MKKSLFVLPLVAFALVGCTNSSTTDATSSYEVVDVSEPYANVQPTEMPNTMEQPDGQYQQPTYSQPAYNQTTYSQPAYNQTTYSQPTYNQQTSSSYNTSGNAEQVGNCTVVRDGTNTPVYSQIQKGCYTGSTYTVGKYDTLYLISYLSGKSINEIADLNGISSMAKLSVGSTLRLR
1409	1	1	1	COG2942	Mannose or cellobiose epimerase, N-acyl-D-glucosamine 2-epimerase family	G	G	MKWINTRTHNHWLENETDRIFEFGYKSVVPTGFGWIGNNGNIRKEMGTQLWITARMLHVYSLATLMGRPGAYKLVEHGINSLLNGALHDPIYGGWYANVDDTGVIDRTKQGYQHFFVLLGAASATATGHPKAKKLLDKAIDIIEKYFWSEKEQMCLESWDETFSQTEDYRGGNANMHAVEAFLIVYDITKDKKWLDRALRITSVIIHDVARNNHYRVNEHFDSHWQPLPDYNKENPASHFRAYGGTPGHWVEWGRLICHLRATLISIGEHAPEWLLEDAKNLFAAGIRDAWSVDGAEGFVYTVDWNGKPVVRERIRWVIVEAIGTAYALYTTTGESQYEEYYQRFWDYSRCYLMDYETGSWWQELDANNKVSNKVWDGKQDIYHLMHCLLIPRLPLTPG…
2084	1	0.981043	1	COG2244	Membrane protein involved in the export of O-antigen and teichoic acid	M	M	MSTITKPTLTSTTLWTSTAVAIKLIIGLVVIKIFALNFGSAGLGQAANYMTLLTVLGVLSGAGILNAVTKFVAEYEQDLQRLQAFLGVSSLWIMSVSAMLALIGLLFAQPISLFLFQTADYSLTIQLLALLQCLMALGNYFIAILKGQRQAKACAMGSIFSNLVGSICLLLCLWFAGYQGALIGFACIPALIVVPSLIALFKQHWHWQWLKPKLDFSISALLSRYMLMTLVTACTMPVVSILLRNQLIDSQGLSAVGLWQGLSRISDAYLQLLTTAFSVYLLPTFAKLSDKSAIQNEVKKALGFIFPLALALALLVFFSRDYLIILLFSPDFTPMSDLFGWQLVGDLFKVASYVFGYLWLAKAATGRYICAEMVQGMLLFGLSSYGIAQQGVAGATLGY…
2134	1	1	1	COG1473	Metal-dependent amidase/aminoacylase/carboxypeptidase	R	R	MKIFESVDNQYSELTQYLIQFRRERHQYPELSNQEVETTKALRAVLEQHQITILDLPLKTGLVAEIQGEPTGKIVVLRSDIDALPILEESGVDYSSKKDGVMHACGHDFHQTAALGAAILLKQRQADLKGTVRILFQAAEETGLGALDVINTGVLNDANVIFGIHNDPTLPVGVLGTKPNALTAGVDRFEIKINAKGAHAARPHDGNDPIIILAQLINAVQSIMSRNVASNENAVVSITQVHSGNTWNVIPDNAYLEGTVRSFNQAVREQIEQRFRTIIDGIKLAFDADIQLYWHAGPPSVMNSPEWIDFTLDVARRNGFEAKLVDASPIGEDFAFYQQKIAGVFIMIGSGGPYALHHPKFRVDDTALFPTANYLATLATEYLALHS
1669	1	0.885057	0.957896	COG2337	mRNA-degrading endonuclease, toxin component of the MazEF toxin-antitoxin module	V	V	MVTSPYVPDVGDIVWLDFDPQTGHEQAGNRPAIVLSPSSYNAKTGLMVCCPITSKIKGHPFEVAISGNIPNVALSDQVKSLDWRIRQAKFKAKAQASEMTEIRQKIAALLGIPILF
631	1	0.999412	1	COG4388	Mu-like prophage I protein	X	X	MQLIEIFKAGKRQSANGQVFHISRDDLQKVVDNYNAEFHEAPMVVGHPKMDAPAYGWIERLELDGDVLKAQPKDVDAEFAELVRCGKFKKISAAFYLPNANSNPKPDGYYLRHVGFLGAMPPAVKGLKDPIFNDSEKDVVEFSEFSDWANAGLWARLRDFFIEKFGLEETDKVLPAWQVQDLHEQAIRDEMKTENQPEFAPHFSEETEPNTAEPTDNHTTDLITSDTQPQGETMSLEDQQKLAELEAENAKLRATQAEMAKAATEKDNAEFAESLLNAGKLIPRQKEAALALLNTDFDSVEFAESDFKQHLKAFLSELPKAVEFAEQATKENAATAPDETVEYAEGTSPESIQADQAIRTYMKEHNVGYAVAFNAIYQ
2012	1	0.99674	1	COG0845	Multidrug efflux pump subunit AcrA (membrane-fusion protein)	V|M	V|M	MKKKTAICSLLVISLTVIIILGLNQFKQIKRADTLANRPPSTNPVKTLVLTQQDWQPFVQTTGLISSDSTGLAIQASGVVANIAVTSGQSVKKGDLILSLDNTVEEANLNALQAQYNYYKRTYDRYVQLAKTASVSKTDLDKAEYEYKNIANALASEKANINRRKIFAPFDGKLGIINAVEGQFVSLGQQIVNIEDLGDKKIKFFLPQENIAQLHYQQALHIELENPTENRLTLQQLIEQPSSSQHSHNIESCQAYVSNIDNGLDTQTGLIAVEGVIKCDKQPSPFTDGMFAKVKIALPTIPNQFVLPQVAVAYALSGETLYILQDIEQDDRYKTQLSDAFKAKRVAVTTLDRQGNLALVVPNHQDALKAGDKVIVSGMQRLSDGSYVREEALTDVIIG…
1250	1	0.974321	0.990393	COG2211	Na+/melibiose symporter or related transporter	G	G	MSKNKPTRKEIFAFAVGDGGCNLVWTTIGSFLTLYYTDSVGIAAATIGTIMLLSRLLDGLSDLVMGGIIDRTHTRWGKARPWILWSAVPMGLGLVLMFSIPDSLSNNGKIAYASISYILMSAVIYTACNLSYNTLLSVSAPDPKDRVTMSSMRFFFTMCTVLFINYSCIHFVEKFGWIGMSVIFGGLAIILLLITFFGTKERTHTEVNTTNTTTSSQHQNATVSFKLLFTNKYFILLAIIFVINYTILGVNNGLRIYYAKDVLGNITLMGTLTLCFILPKLIGNLVYPYINNWLGKWKSMMLGYVLELAGLLIIALSDTSFASAVIGLVLLGIGGIPHTAGLFAMVADVIDYGEWKTGVRLDGLTNSVTSFGMKVGAGIGSALVGWGLAWVAYDGTLAA…
1719	1	1	1	COG0591	Na+/proline symporter	E	E	MSSSIWIIIGIGIYAIFIIAHGFGSFKSTSKDSESFFMAGRGVNPFVLLCTTAISVFSALAFYGVPASIYRDGIGFFSNTGGMIAGLMFASIGYRLWLLGKEYGFTTPVDFLRTRYYSESYGVLIAIVLILFIVPYVAMQLVAIGDATEITTKGMVPYIVAVALGTLVVSLHIIGGGMKSVAWMDTFHFILGTGTLIVLCVYLVTTYFPNGGLAEAVQKINSNPELSPILSHPGPREIYNWKGTLNNALAGAVATVVWPHIFMRTFIASSKDNFKMMAWAMPLAYVVVYGFIVVLGALIIPAILSSQDITQYGMDNVVSVISTQYASPFISFISLLCLFAFGVSTADSMLLSASAIGSRDLYVRHKYELRNLAIEPRKVVTFGRILLLVLMVLVLIVVA…
28	1	0.99801	1	COG2375	NADPH-dependent ferric siderophore reductase, contains FAD-binding and SIP domains	P	P	MQPTSRTPIADYDQKLDIIEHVNLGHTKALLAIAHVYINEQVENAQLVDLFEEGIILQCQIGDLIESHFVAFLTQDSLHHNVHNLAMHAMKKLGKLISQFWHFQLLKKQQVSRNMCRLFLKSDSPLADQSPAGYAWRFILERFSNKPDSQHINTHLGRYYTLRNTEKSSPNLDYADIAVVDIFQHNDTAGSLWTQDLTVGEFVVANNEFYEQTDHLTTGRALLIADETSLPTVAKLLENWQNPIPPTVISITQDPADQTYLNENLFPAGSQLFRFEYSESADQILTFLQQHPEIEKVWGALENQQAKTIRHYLRNERQFKAENNRVKAYWIKNKP
2035	1	0.999021	1	COG3057	Negative regulator of replication initiation	L	L	MKIIEVDEELYQYIASHTQSIGESASDILRRLLHLPSLNIRSVALDLSDKTENIDRSLSLQQETASIYSESTVNQQTIQPQEEIVTQQVQVVERAEPDTELDVSKQSDAADLMILLDTPEFKQESKAVVRFLTILSGLYKLNNDAFTQAIRSENVQGRTRVYFAQDEQTLLDAGNHTKPKQIPDCPHWVITNNNSGRKMIMLEGVMREMGFDEKTIDYVKNAFVADN
1371	1	1	1	COG3201	Nicotinamide riboside transporter PnuC	H	H	MSNFKHYFDDWSLKEKAWLAFVLIFQTIAWVFDNETTFMLIMTLTSSLNLVLGAKGKIEGLYFAIIWSVMYSIQCFTIPLYGEIMYNILYSIPISIASIILWKKNMTSEGEVKFRTMTKAGIIQMILITVIAVWGYAEFLEYLGGGFAFMDSLTTVVAVIASFLYMKRYSEQWLMWVVVNVLAVVMWIMIFISGDSSAFLIIIMNVINMINSVYGYFNWRKISVKIHTETP
1158	1	0.997832	1	COG2223	Nitrate/nitrite transporter NarK	P	P	MSNHHFTVLSIKQVLLAIVGIYTTQTIITSLTTQALPTLWRDAGVSLQFIGLTALLWIPWGLRFLWSPLMERWRLPENQLIRRSRGLILTGQWLIVSLFLLISLLVWWGILELSQSAVVFLTILLFTALVAATTDIASDGFTVEQLAEQQRGWGNTAQVGSSYLGAMLGSGGFVLICVHWDLATAFLLLALIILLLSVPMFLLREPPRSSTAILTHRPSLKYAWSRATIRISLVLMLLSSVGIRLTLGMFGPFLIDKGASLSDVGWLFGSLNITVGFMGAILGGILVQTKPSWQAVIIALAIELVVLFALTLLADSVSLSILMFLISLMFAVFSVLWVALYSVLMSVASPLQSGVDFTLFQSADALLAVLAGLLAGGLAQYLGYTACFGLAAVSVVVAI…
1209	1	0.999493	1	COG2223	Nitrate/nitrite transporter NarK	P	P	MQKSPDNVQFMHFYLTKAQSIMRTIAIMLFMEGTMNTPNSEIEIIPRFILLATAVSYIALGMLLGFTQGGLAPILRSLGVSLAELRWVYVIYLPFGLAFLWSPMIDAWRLPWLGRRSGWIVSSQLLATVAMLMVSFLSPSTGNWVMLMLLGLVATFAAATADVALDALNVDLLPEKNRAMAAGLKMGGLALGTLIGGGALVAFYPQIGWHGTFGVIAACTACSCLPILALVSKERRLFPQSLPQGVQFLHLWRDTVLRQRLLRLSLLVCTLLALFNFNRLLLVDMGVSLERIGTLLGTTGPFANALAALIATLLLHRLSIKQTAWLSIAVCLVGSVIVWLGVFYANSNTVIIGSITVTATAAGLYVVLGSLILAWAKGTQAATDYALLYGVGRFIGTFA…
1584	1	0.997279	1	COG0778	Nitroreductase	C	C	MQHSSALTTALYHRSIRKFKDQAIPDELFNRLIEAGKMASTSSFLQSVSIIRVTDLHKRQQIREICGSAGGKGQMYVQESPEFLVFCVDTHRHQQLVPEAQTDWTEILLIGAVDVGIMAQNILLSAESEGLGGVYIGSLRNDIAQVTDILALPTGVIPLVGLCLGYPDQEPLQRPRLPTSLILSENAYQVATQTDLAIYNEQVKAYYLERNGKVFNWTEQVRNTLAKPVRPDILAFLHKQGFAKR
1254	1	1	1	COG1972	Nucleoside permease NupC	F	F	MVGMRIAVGVATVVMVFVVMIAINEFVAYMNFSPYLKEGLGNLDPKTIVIIALGLCGFANFGSIGVIVGAFGAIVPERTSEIAKLGFRALLAATLSNLMSATIARLFIGLAQNLNVKKVQYKISAKFCTALLGCCYESPFNRR
489	1	0.994178	1	COG0451	Nucleoside-diphosphate-sugar epimerase	M	M	MIVGQGMMAKAFSGYAEDPKHIIFASGVSNSQEKNRTLFGRESQLLEQTILHHPDQKLVYFSTCSLYDPSLQNSPYVQHKQNMEQQVQRLAQQYLIVRLPQVVGNATSPTIVNFLYQAIIHQQSFTLWQESYRNLIDIDDVVTILNEILANPLFTNQIINVATNKMINVQHIVMILENITKNTALYQSIAKGSYYSIDIAPIRPILTKLSLNFAQDYVQKTIEKYYAQK
574	1	0.993203	1	COG2873	O-acetylhomoserine/O-acetylserine sulfhydrylase, pyridoxal phosphate-dependent	E	E	MSELHFETLQLHAGQEVDSSSKSRAVPIYQTTSYVFDDAQEAEDLFALRKLGNIYTRITNPTVAVFENRIAALEKGVGALATASGMAAITYAILALAHAGDHVVAASTIYGGTFNLLKETLPRYGITTTFVNVEDLTEVENAIQENTKLVLIETLGNPLINIPDLEKVADIAHRHRIPLVCDNTFATPYLINVFSHGVDIAIHSATKFIGGHGTTIGGVIVDSGKFDWVASGKFPQFVDEDPSYHNISYTRDIGAAAFIVAVRVQLLRDTGAALSPFNAFLLLQGLETLSLRVERHIENTQKIVDFLSHHPKVEKVNYPSLPNSPYYALAQKYLPKGTGSIFTFHVKGGAKEARQVIDKLEIFSNLANVADAKSLVVHPATTTHGQLTESELLACGVTP…
1468	1	0.994832	1	COG3307	O-antigen ligase	M	M	MLNPVRKYGGKIGKMTILTFIKQNKMLALTNSAVGLYFLITLLFKGSHNIGFALLVATGIIFAIYHVVKKQSVDFIPQDKWITISFVFYVLVFLLSLLVNGGKMSELDNPSRALLVLPLILLFIKYPPKLTILLVCIPVGAVIAGIVALIHRFVLHYIRAFEHQMQIQAGDIAMSLGMFSFAIALYFVYKKQTKLTALCFIASLCGILASLLSTARGGWVGVPFILGMIFWVYRKQLSKKVVGIVSTVLVVLIAVAVMIPQTRITQRLQQMERDISVYVDKNNAGTSLGARFEMWKSAVLMAKEKPLLGWGAEGSNQQRKEQAKQKLVHPVVGNFTHAHNQYLDDLSKRGILGLFALFGVLFVPLGYFWKNMASQHATIKLTALLGSIHIISVMFYCLS…
413	1	0.995253	1	COG4206	Outer membrane cobalamin receptor protein	H	H	MKLKKISGAIMLTLGAISPASAEEKTEILDEIVVTEVSNNPFKSVSQSELKNGSTSLGNALSKQMGIQANHFGSGASTPVIRGQESYRNKIVQNGSDVVDMSNMSPDHAIMVAPTLAKEINVIQGVDTLLYGSGITGAVVNVEDDKIPTQLPSRTVEGSLDTRYNTNNQEQLYNLATNLRLNNHLVLHLEGLTRHAKNYKSAGYTEQYSVENPCNNSNTSECIEAIFSDDYQENFVESKHYRYINNSEAKSKQGAVGLSWIGEKGYLGIAYTDRRDRYGLTGHEHKAHFCHIHTHQENDEYLEGINLHCEHTSINIDEDFHNHDPSQPEQYAKLKLHLKRVDLRGAIIQPIAGIEQIRFIANDSRYRHDEIEGQYTMSSFQHNGKSVRIELDHKPTQHI…
221	1	0.99687	1	COG3203	Outer membrane protein (porin)	M	M	MKKTLVALAVAATAATAVSTANAATIYEQDGTKIELSGSLRLYLGRFADDQRGDLRDDGSRVIFKASHDLGNGLSGFAGYELRFDGGDDTTTNTFGNPDTRHLYAGFKHQDIGALSFGRQLLNIDDVLDDGAYANSAALYPVSTRDYKVVKFRSVEWNGLSFGLDYIFGDSNKNRSTTGNIFDQDGNHLTDLKNGYSASLFYNYDISDNQSLKLAATYLQRDYDDVRTTSTTAKERFWLAHAAYSYGPFYIAANYGQENNKSDYTGKVKTRYSLVDLSYQVIDPSRVYAQWERYETKTDKLQNQYLVGVDYKLHKNVITYVEYAHKRTKDWDDNGLVEPTTKKDNVYGVGLRVFF
557	1	0.999052	1	COG1538	Outer membrane protein TolC	M	M	MQILHRTFKLSMIAGFVAILTACNATVDAEQASSVNTPVQFDQVKAGQSQMEIKQWWQNWNDPELSRLIEKGLSRNLDIALAQARLNEARANYDYAEADKGINVSGNASTGGGVNRMKIGNSSADTSASGNIYGGVSASWELDFFGKKKSDADAARSLTLAQQEQFYAAQMLVASEIANNYFQIYALDRQANLINQAIKELQSLENYVKGRFNTGGATAYEVTEISTQITAQQARLTTLKAQADQAQRNIAVLTGETPQGFRIVKSGNPLARIPAVPNGVMPSDVISNRPDLRTAQHNVDAYAAKLASAKADLYPRFNISFMGDGGYVKLDNDLSKVSGILGMVSAGVQLPIFTNGRLEANIDAADARLKSAVIQYDQTLLTALKEVDNAYQMSAALKN…
1089	1	1	1	COG4771	Outer membrane receptor for ferrienterochelin and colicins	P	P	MKKSLLASAIVLALANQYAVANTAKSNENLQEIKVVEQEASDLTTTITPNQITRTNPADIKQMLENTIDVNVNELQRTRGGNDGVNIRGLQGNRVATSVDGIPLPESQENKLFTTIAGAFGRGDFVEPSLLRSARVDRSGSASGLSGAIDFQTLEPQDLLKNRAFGGLFSTGYQSVDTSLVGTMGVALQHGDYQGLVVGTQRKGHETKTNGDNSGTGSTRTEANPADYKNGAVLVKNYYQINEQNRIGLAVEYVHRRTETDNLSDISTSVTPFVTTSTDSSHSNDQVTRTRLALTHNYTGNDIKLDSKLYFQQSDTENYRVRHQTRTVSGNSTVTERIDNMDNKEKLYGLSTQATQFINSSIPQVLRYGLSASYHDLTNDIDTTSDTSLSQSSADTKQF…
685	1	0.998217	1	COG0760	Parvulin-like peptidyl-prolyl isomerase	O	O	MFMEKMHNASNSGVAKAILAVIAISFVITGMYGYLGASVDTSAVKVNGEEVSQHQFQQQYNDEYQRISNQLGAEFAAVADTPEFSQGLRSTVLNRLIDQQLLTQYVNDLNLTVSDERIKQEIVRTPMFQIDGKFSQDAYQQVLRNNGMNADMYAQYLREALRLEQLQSGLVETEFLMPKTQNEFAQLFFQQRQVRLARLPLADELDKQAVTEQEIADHYNANKSAFIVPELVKVQYIDLTKAVAEKNVTVTDTAIQQYYQDNKDQFSTKAQHHLAYIQLPNEKEALDVYEALRNGADFAELAKTKSSDKLSAEKGGDLGWLNNGDLPKDFEDVATLVEVGQYSTPIKVGDNYYIVKVNDRKEAVVLPLEQVKDKVIAQVRQELLNTQFYTMEKKVAEKA…
1642	1	0.995878	1	COG1472	Periplasmic beta-glucosidase and related glycosidases	G	G	MKTIFKLLPVATLVLAACVSQSVQQPELGAKNLPILELNGLRFKDFNRNGKLEPFEDWRNSPEQRAKDLTTRLSIEQKVGLMFHSTLPNKKDSTTEYDLVELKNLVQTKHVNHLITRLATTPANFAEQNNLAQQVAEQTEFAIPLSVSSDPRHHFLRVAGTPVNEGFSKWPETLGFAALNDPQLTQQFGQIAGKEYRAVGIQVALSPQADLATEPRWSRVTSTFGSNPDVVSQQVGAYIEGFQQGNQGVNPQSVATIVKHWVGYGAEPNGYDGHNYYGRNAQHTADSFALHVKAFDGAFIASTAGVMPTYPILNGATVNGQPLEKVGAGYSKQLLTDLLRNEKGFKGIILSDWGITRDCTSQCTNPTKANPQTLKQVAMPWGVENLTVQQRYVKALNAG…
1052	1	1	1	COG2837	Periplasmic deferrochelatase/peroxidase EfeB	P	P	MSHTNNARRDFLKSSVIIGAGLTMGLAAGTAYSLEPRTKITIENIYPFFNPHQQGITSPAQHHIYFIVLDLHSQDVDEIHQMFKTWTEYSRQLTQGKNVQTYSQNGYVPAVDTGEADSLNPYNLTLTFGVSPSFFTKLGIEKAKPAELVDLPHFPRDQLKAEFTGGDICIQACADDPQVAFHAVRNLVRVARSEITMRWSQSGFNSFEGTDTPRNLFGFRDGTGNPQGEELDKTVWYEGNNWLKGGSFLVVRKIQMFLETWDRTNLNEQQHTFGRHRDSGAAYGQKKEFDPVDLDKKDANGQPVVPEDSHMHLAHKTGLKMLRRSFSYSSGIDSRTGQFDAGLLFISYQKDPQQFITIQNKLGNIDKMNEYITHIGSGLFACFAGVKDENDYLGKALFE…
199	1	0.99493	0.992415	COG0810	Periplasmic protein TonB, links inner and outer membranes	M	M	MKKDSLLGFLGSLVFHGGLVGGLLSLAINQDTANGQLGVLDTNISMQMMMATTIEESEPEPEPEPEIEPAKEPEPEKIEIVADPTIKPEPEKPKEPEKPKEPEKKKEKPKEKPKEKRQEPVNKVIAKPNPNAVKADRVMEGNGLVNSQATAISNNATTNNPNLAGTGSNTSEISAYQSALRREIERHKKYSQRAKMMRKQGVVVIAFNLGADGSISGARVARSSGSEDLDNSALQAVQSARSIGPRPAGMGSSVSVPVQFKIQ
1031	1	0.998519	1	COG0697	Permease of the drug/metabolite transporter (DMT) superfamily	R|G|E	R|G|E	MRYPFSNIKQSLPLLPFLLLPPLFWAGNFAVGRAVRADIPPYTLSFGRWIIALLVLLPFVSATMKRDWQQYRQHWGRIITVSIFGVAAFNTLVYKGLHSTTTTNAILLNSCIPVLIMLIGVLFYHQKIKLIQAIGLSISLFGVLVIVLQGQWANFVALSFNPGDIIVFMAMICWAIYTLLMKDIPANIDRKGLMGVQIIIALISLFPLFLWEQLQGSQTIIWNSSTLLGLAYVGVFPSVIAYILYNVAIQKVGPVISGLSIHLMPVFGVLLSVSLLGESFHLYHLCGIGLIGLGLVLSQK
662	1	1	1	COG2932	Phage repressor protein C, contains Cro/C1-type HTH and peptisase s24 domains	X	X	MIQDWYELKDLLGIAGLPATVQGITKKAKLENWERKRKENVKGRVYEYHYTSFPPSVQQALGFTPDIIQSPTYSGKALNLQTDDEDYCDIVDFREIDVSAGFGCENEEIYQQDWVKVERAWLIRNRLNPNNCVMFKVHGDSMEPTLSDNEEIIVDRSKQTLTEGKIFVLNHMGTMWVKRVKINFDSIELISDNDFYSPIVLTEDDANQLNIIGQVVRGYRDF
2183	1	1	1	COG5412	Phage-related protein	X	X	MLLDELLIKIGFDVDSAQLNQVGQMLNNVGETAKKAFDNLRSEKIDVDFHSLNQVEQTLNNIGDSVKQTFDGIDLGDVNIDTLTEQVEQAFDDVSDHIKTGMVSISDFIDTTTAKELFGDQFETATTELDEFVQQLLQLSNIDEINTDEIQAFVDKVAEFDEFIAQFGEDTQAYFAELSDGFHQASETYQQGLAKVAQQENQFSNATEQANDALKHQEEQANNTHDALAKTGNVFHDLLGSVSAFIGAKFGIQIDSEPFKKLGKAIKDSQEKAKSFLGSVKGIPVALGLVGTAVGAVVKGLSAFVDNTLTSLDSLAQLSRVSGVSAGYIQSLGEAAKRSGSSMEAAQSSIAGLQRTLGEALNGVGRGAKTFEQFGIAAKDASGKAKTMPEVMEEIQGKI…
695	1	0.998685	1	COG3479	Phenolic acid decarboxylase	Q	Q	MQIKDLDQFLGSHFIYTYANGWEYEFYVKNENTVDYRIHSGMVGGRWVRDQKADIVKLTDGVFKVTWTEPTGTDVALDFMPNEKRLHGVIFFPKWVHEHPEITVRYQNDFIPLMEESREKYETYPKYVVPEFADITFMKNEGINNEKVISEAPYPSLAEDIRTGKKSFS
810	1	1	1	COG1447	Phosphotransferase system cellobiose-specific component IIA	G	G	MEQQTMSQEDLQVVAFEIIVHSGDARSLIHQALSLMKQGEFSQAQCQLDEANKNLLEAHKSQTSLLKDYACGTVINMEIIMVHAQDHLMSTMLLHEIALEFLALHQKIAEQV
812	1	1	1	COG1440	Phosphotransferase system cellobiose-specific component IIB	G	G	MKKALIICAAGMSSSLMAKKTTDFLKSKEHDISIDAVSATEGQKAIESGAFDLYLISPQTKMYLAKFTELGQKVGKPVESIPPQAYVPIPMGVEKLANLVLEKI
808	3	0.799117	0.860638	COG1455	Phosphotransferase system cellobiose-specific component IIC	G	G	MNGIFQLLEKYLMGPMAKIAAFKSVRAIMAAGIASITFTIVGSLFLVFNVLPTTFTFLQDFFNDTFFRISDLYLLVYKASMGILAIYFVIVISYEYTKIHQQEDELNVSPLNGALLAVFAFFLCVPELLFVDGKMQLLAASKTLNGWTIGGNGPDRLGTVGIFTAIIMALLSVKIYCFCVKRNFVIKMPEAVPEGVARSFTALIPAFAVALVVLVINGTFVLLGTDIFKVIAIPFAFVTDIANSWLGLMVILFLIHALWIVGIHGASLIMAFVKPILLINLQANINGEVVPYAGEFNNSFVLLGGSGATLGLTLFIAFLARSQQLRILGKASVAPGIFNINEPIIFGLPIVYNPYLAIPFFFAPMVSASLAYWAIKLEWINPIIAYIPWPSPAGIGAFI…
2231	1	1	1	COG1263|COG1264|COG2190	Phosphotransferase system IIC components, glucose/maltose/N-acetylglucosamine-specific|Phosphotransferase system IIB components|Phosphotransferase system IIA component	G	G	MMNDTEIAKKIVEAIGGFDNVQSFAHCATRLRIMVKDESKIDKDTIEDLDKVKGAFFNSGQYQIILGTGTVNKIYAEVMALNGGSTQTTQTAAPVPPQGHWFKRAIRTFGDVFVPLLPAIVATGLFMGVRGAINNDEILSLFGTTSAAFSASNFYVYTQVLTDTAFIFFPALICWSAFRVFGGNPIIGLVLGLMMVSPALPNAWAVASGGAEPIYFFDFIPVVGYQNSVLPAFFVGLIGAKFEQWFSKRVPDVLALLVVPFTTFLVMSILALLVIGPIFHSVEDYVLAGTKFLLALPYGISGLIIGGVHQVIVVTGVHHIFNLLESQLIAADGQDPFNAIITAAMTAQAGATLAVGFKTKSLKLKALAYPAALSAGLGITEPAIFGVNLRYGKPFIMGL…
811	1	1	1	COG1762|COG3711	Phosphotransferase system mannitol/fructose-specific IIA domain (Ntr-type)|Transcriptional antiterminator	G|T|K	G|T|K	MFNKKEIAILQYLFDNQDRFVTSEQLGLQLNCSDRTIRHYIKSLNSELPQYGASLLAKQGNGYQLQIENLDQFRPQLQLSRPRRAIENKQDRQKYILQQLCFNQPHILFDRLEQELFVSRSTLSADFKEISDLIKPYQLILRSKANQGVSIQGSEQNYRSFIMDYFFKENFGDAINRYIGNAIFVDEIRFEQLLQIILEECRKGKLYLADFMLQNLALHILLAIKRIKTGHKLNINLDQHELNEHVNESRVAENIIARIKAENHVSMPQSEIDYITLQLLAKGKRHSSQLSEQAQQQAEIKRRIEQIEQALQVQLQDDESLLQAISQHLQLLITRLKNHITLENPLCQEIKQNYQGIFQLVRSNFAEFPAFDGMEVSDDEYSYLTLHILGAIERYQNKK…
432	1	1	1	COG3093	Plasmid maintenance system antidote protein VapI, contains XRE-type HTH domain	V	V	MEMYNPPHPGRILKEYMGDISVTEMAKHLGVPRSELSQILKGKKGISAEMSLRLSKAFSTHDELWLKLQNKYDLWQARHGKNVTYQQVTPVFNASVYS
1187	1	0.999008	1	COG2843|COG2843	Poly-gamma-glutamate biosynthesis protein CapA/YwtB (capsule formation), metallophosphatase superfamily|Poly-gamma-glutamate biosynthesis protein CapA/YwtB (capsule formation), metallophosphatase superfamily	M	M	MRFIVCGDALFSSRNLAKRLEPKLIKLLKEADGCFVNAEFCTPKYDTPPAAGRGYITSVQAQTLDEFVDLNLLMVGFVNNHTGDYGWQGVVDTIESAVERKLIPCGVGRCLGEARLAKFLDTIDGRVGIVAAGSTRSEVFAASDAGAGVVARPGSNPLRWKRTYVLESPLFDELEKIDRVLGTRISMDDGLKVETYAPQGKDNFKFGSLFEGALDIERGVISGVKTSVHEKDAEEILKSIQDASKRADLTIFSLHTHEGVNENWYSPYVPEFIEDIAHRAIDNGANVVVMHGAHFLRGIEVYKNSPIFYNLGSIFMEFEAGESIITPEMYESYGFSPNSRPSELHTRRAKDIHGNFIGFNAERRFSENCLLQLDFENGQLTWSLLPIDLQLNASRTLDR…
459	1	0.953267	0.995708	COG1989	Prepilin signal peptidase PulO (type II secretory pathway) or related peptidase	U|N	U|N	MIILGFFLLGGIVVTLVRYYLQNLATQIQQEIYQSYVDLFPDNAPQVCPENSRLMPIKCAGFWLYFLVGAILFGLNAYYFINPMQALFWLTSGVLLFLIAKIDGHYQFISVTHCQCLMALGVLGAYFQFMPISLEQSLQSLLIGFGAFYLIFYLARCYYQQDALGRGDYWLMGALSGFHPWQQLPYLVFVACCAGLLFAGWKAIKREKEVYLPFAPFLVIGQIVVLIIEHFCL
184	1	1	1	COG1651	Protein-disulfide isomerase	O	O	MKYLSILFLLLCSSMAWADNNALQKNTAELASTENEKTFQDGRDYFSYTTPINMQLEKGRVQIQSFFDYDCRTCVNVQDILVLYQELNSDRVSYEEYPIATANAHYSAQVFYSLHQMKRDDVSDLLLFETTEVSRYIELAKLENLSVWLQQHQVDEKRFNNIFYANSTIKLVNSAIARTEKYGVFTYPFVVINGKYVLTISTLYNDDYTFAVLDYLVNKVILEQQDK
1140	1	0.998084	1	COG0684	Regulator of RNase E activity RraA	J	J	MTELAINQLGVVKRHIQRADKSAVEKLAKFGVATIHEAMGRIGLMKPYIRPIYPHAKLCGTAVTALLQPGDNWMLHVAAEQIQQGDIVVAGCTADSTDGFFGELLATSFRARGAKGLIIDGGVRDVAELEKMDFPVFSKAIHSKGTIKATLGSVNVPVICAGMVVYPGDVVVADADGVVVVPAAKALEVAEAAKKREDNEAGKRQQFEAGVLGLDLYKMREKLANAGLQYID
1780	1	0.994771	1	COG1943	REP element-mobilizing transposase RayT	X	X	MQYNPNIHHRKTIRLQHYNYAAAGSYFITICCFENQPIFGKIINGEMILNENGKIAQQEWLNTVNKRKGIEIDEFIIMPNHMHGILNFINELSEFNDMIKPRFNSPKNNLGSIIRGYKSSVSSKIGLGYSVWQRNYHEHIIRNEQSYNQIEEYIICNPIFWKKDCFYIER
1659	1	1	1	COG2304|COG4961	Secreted protein containing bacterial Ig-like domain and vWFA domain|Flp pilus assembly protein TadG	R|U|W	R|U|W	MMKKIFYFAKPGYNTLFQFYKNESGVYTVMMGILSFVLLGLIAFAVDGSGLLLDKARFVQGMEQASLALVTENNANRQNPKHYDVTRQPSDSLDPKEKLMEQQDKRNKELVSGIVRSYYLGNTYRPNNQEVKDQYDYYCGTINNDLGANSKTVACYVSGNFDRPSWIYLKDQPLSFAKVNNISSGAIYAQKNLDEVAPLDLMLVSDFSGSMNSDVNNRETYLYNNSKLAILKDVVESIGNDLLDVSKAERENRNISPFNRIGFTAFALGAQQKNNTGYCYLPFSFKGRSSKLPLSNRTNFYELVSYINNNVDLSATINKIASFNGTDISYSVSFSKNDFCLKDNDNHSTTDFWFTKEQHSTLNDKFRSLKANGATLSSSGLLIGANYLMDKNNDPEAQP…
941	1	0.988142	1	COG1404|COG3468	Serine protease, subtilisin family|Type V secretory pathway, adhesin AidA	O|U|M	O|U|M	MSNYPWKRTLLAIVIGIVMTSKGYAEDIDENDEQQQAPQSGQMVNPHDGIGLTEQISAQYSGDGVKVGVIDSGFMNEHPLFNQQKLHSLTFEITDNDGNKKIFDANHYELETEDENGEQKTVYSMHGGQVAGIIGANSFLQYRGGVAKNADIYLTTTEATETPQDDDTDDSDNSKDNDKSLELLLGNEAEIKDHRNTIATAFAQHTANKVFVINNSWNEDPVDGTARVMDDKYKSGIEKATDNVLINAIKDAVKKDTLIVFAAGNESKQQPGIMAALPRYLPELEKHYLSVIAVDDGENIADYSNRCGVSQNWCVAAPGTLSVLVTEGAEQNIKLPGLQVQQGTSFAAPVVTGSLAVLKQRFQYFTATQVRDTLLTTATDLGAKGVDDVFGWGLINLSK…
663	1	0.933333	0.940532	COG3850|COG5002	Signal transduction histidine kinase, nitrate/nitrite-specific|Signal transduction histidine kinase	T	T	MKVTINFLSAKIFALFWCIFGLLLLVAYFIPQLDTRLYVDLTSKEINKYHQDIVSAVRTQQFSRLLVTPEPLIEEKLNFTRPVLVDNERNIIGAKKNEIVYIQDFIHHSHDVLRPQSRTFYNLLIAGPFSIHLVDEDKQFAYFVYFITNVDPQRAIVNYTFDHPLFLIMLLMLISTPILAWLAYSLTQPIRRLQRAANAVALGDFRVNKELETIGVVELRQVGKSFNQMAQSLADIINTRQYMMSVVSHELRTPLTRLQLALGLIRRKMGDSKELQRIEMETNRLNQMMNDLLLVSATQVENSLYRKCISLLQIYQNVLNDAIFEAKELHIEMHIKQQIKSPEKCFIYGNLEGLSRALENVIRNALKYTKSMIEVSFLLRNNQVFIMIDDNGQGLPEAE…
816	1	0.9978	1	COG1053	Succinate dehydrogenase/fumarate reductase, flavoprotein subunit	C	C	MTTAFEQLTLASGLTLKNRVFMAPMTTQSADENGFVNDELVTYYRERAKDVGAIVVECGYVQRNGMAFPGGVGLSTDDHIAGLAKIAEAIKQQGSVPIMQIYHGGRMVRPELLPDGSVAIAPSAIAACRHGCVEPKALTVDEIEQLIVDFGLATERAIKAGFAGVEIHGANTYLIQQFFSPHSNRRDDQWGGDIEKRARFPLAIVDVVKSTVKKCLGDKPFVVGYRFSPEELEKPGINYDDTLFLLEKLAHKGLDYLHFSTGQAVQTSIIDLHDKQPLIDKLIQNRSETLAKIPVMGVGSIKQAKDLDNAFAHGFDLVSVGKALIVEPRWLQKVQDGEEVLNFMHIEDCKARHVPETVWDIIGPSMEKEEKSYLNKQAPRKEFVPGTYVERFADFHGMV…
2230	1	0.998602	1	COG1621	Sucrose-6-phosphate hydrolase SacC, GH32 family	G	G	MAFTTEQRYRAYADWSAEYIEKIKKNTALSPWRTHFHIETPHGLLNDPNGFSYFNGKFTLFYQYFPFGAAHGLKSWVHTESKDLVHFKQTGTVIYPDTPLDSHGAYSGSAMQFGDKLFLFYTGNVRDENWVRHPYQIGALMDQKGNIEKLNKILIEQPDDVTDHFRDPQIFNYQGQYYAIVGGQNLNKKGIIKLYKAHNNDYQQWDYVNDLDFANDNTAYMMECPNLVFVDSKPVLIYCPQGLDKSVLDYQNIYPNMFRIGDNLDVEQAKLVNPTPLQQLDYGFECYATQAFNAPDGRALCISWLALPDMEYPTDKYDYQGCLSLVKQLAIQNGKLYQYPVEDIVNLRTSKEIFAERQHTNNIYELALNFAPNIRHEMVLMADKNGNGLTIIVDTTKGE…
1372	1	0.998509	1	COG0524	Sugar or nucleoside kinase, ribokinase family	G	G	MKTLILGSAIVDQIMLIDRLPLSGEDITCIETKTTIGGCAYNVASTMRNLDTHHDLYVPVGTGLYANLIRETLLQNGYPILFHSEEKDNGYCLTLVESNGERTFITVVGAEGYLKKDWLENINLDDYSQVYVDGYQFTNHNGKIIAEWLSANNQTQLFFAPGPVINVINAEVMNQLLSLKPILHINEKELKDFTHHNDIKQAVQCLHSQTQNLIIVTLGSKGAAYFDGTIFEIIPSPKVKIVDTIGAGDSHIGAILAGLSQGYPLKDAVILANKIAAEVVQTQGSTMTKENFIQKFGG
310	1	1	1	COG0659	Sulfate permease or related transporter, MFS superfamily	P	P	MKLFNTWKTRQDGEVSPYIPCGPFQIRLPFIHYRFEWPDYLQGLLMCAVDLAAIPLLTQLLGMPFEVALAIVVLNGLFYLAHHLLGDPCVPGWITPAIPLIMVYCQQFPEGPERIHSLIAFQMMLGLFSIFLGTTKLASKIVQVIPSAIKSGIIIGAGFAAIISIFKVGGRFESFPWSISIAVGIGFYLLYSTHFAQLQTKYPFFSVLGKLGIFPIIILAVLIAPLFGEASWPTIKWEFSHPDFKTLWNEYTVFGVGFPPLAMYLSAIPTVLATYIVLFGDILQNKALIADGQKQRADEKVEYKSSRAHLIFGGRNTVMSIIGPDVTMCGPIWSAMQVVMIERWKKGRKAMDSFFGGIGSFRWGTNTGLLLMPIVSLVQPILGVALALTLLIQGYVNMK…
1070	1	1	1	COG2168	Sulfur transfer complex TusBCD TusB component, DsrH family	O	O	MLYTFSNAQYSATELQRYFAQLTEQDAVVLWGDGVLLMVKQVALLQHVKKGYVMQEDLIARHLQQHPNLTLLKDHIQPINMTQFVTLTEQYSPQFAL
1407	1	0.998504	1	COG3684	Tagatose-1,6-bisphosphate aldolase	G	G	MIKEKIMLSYTIKDIARASGGFAMLAVDQREAMRNMFASAGVKQLIADQVLTDFKVKAAQILSPYASAVLVDNQFCYQQIVAQKAISPVSSMIVAMDKFIPGNGIPVDQVELDKDIDPYEVRANGGKALKLLVLWREDEEADQRLEMVNDFIKSCRSAGLVSIIEPVVRPPRTGDKFDREKAILCAAKELGDCGADLYKGEMPLFGQGEASTLLKATKALNDQINMPWVILSSGVDPNLFCRSVRIAMQAGASGFLAGRAVWSSVIGLPDTELMLKDISAPRLQHLGRIVDEMMATR
1488	1	1	1	COG0457	Tetratricopeptide (TPR) repeat	R	R	MKQKPFFRSTLTLAFVATFPTLALAAEEPSPEQQQLEINRRFDDQRMRDNSLDQQIQLKQIPQSKQPVQQTESHSLSISKEELAKHPELVIRALIPALSQGKTEIVAMLYPIYQKIDSRWHDPLLTQWQQAILAKKERNYNQSIRIYRQILADRNDILPIRFQLATVLFENKEYDAAEGQFEKLRSENLTPAVAGLIDAYINAIHQQDRWSFGGGFTYLNDPNINNAPKSGTTYGNWTSPKRESAQGVGYNFDASKKWSWGNGFYHQLDLSLYGKYYWNNKKFNEMTMHEGFGLGYQTGRSDLSLIPFLEQTLYAGGRETRESLKRFSKSGGSTLSFSYWLNPKWQWRANYLYSEQRYTERKHLNGNTHYISTGLSYLRNAQQYWYINLSYNRTGTRDI…
514	1	0.99836	1	COG4972	Tfp pilus assembly protein, ATPase PilM	W|N	W|N	MGKLIKKNTTIQVGIWITKQYFELVWFAQDKMTENTPHFCRVNIDTPNSIQATLVEHMSNHINIQRPLEIKWVTAMLPHKVWSKSIILPHHLNENECDHQCRYILENELPIALDELWFDYMTTPLKQGLRLDIFAVRKAVGQTRLIQFLPLNIKTLDTAVHCLYRAFGYLFKTTPSSNDLFIYQDQQSTILFRQTLQEWQILSSPNQTNLTELYQQFVQRYEQNIDNILLYCETNNIQFHQPYQQVTSDIPLIPLGAALWQKDWQQNENRT
817	1	0.997265	1	COG1477	Thiamine biosynthesis lipoprotein ApbE	H	H	MVEKSVTTFIAMGTVNTITVFTPIVDEIKVAVYQLVKNLEDKFTVNRPYSEVMSINQAAGLSPVQVSRDVFELIQQATLASLAPNSGFNAVIGSLTRLWKTSFQQHCLPTEQNVAQSLKLINPHDIVLDAKKQTVFLSKAGMQFDLGAIAKGYIADRLVQLLAQYQIYAGIIDLGGNVIAFGEAPHNAQGQWKVGIQQPFAKRGQYVGIVAVKNKSIVTSGNYEKYTEIQGKSYHHIIDPNTGYPFESQLDSVTIISDRSVEGEILSTQVYFKGLEDGLKFIEKIPHFAAIFISKDQKVYVTSNLVSSFKLVSSDYELTNINSVI
2100	1	0.99963	1	COG0526	Thiol-disulfide isomerase or thioredoxin	O	O	MGHPSVYPTGVTIYKPEKCWNGYNLVQTIRSGALLFDMNGNEIRRWDEFHGFPNKLLPNGDLIGYSGDRNPRYGMQDGVDLVQIDYDGNIVWKFDKFEFITDKGEEPRYMARSHHDYQREGNPVGYYVPNQLPQTRSGNTLILGHTTLSNEKISPNKLLDDVFYEVDWQGNIVWQWKASDHIDEIGFSEEARQSLFNNPNIRAADGGVGDWLHINCMSYLGENKWYSAGDERFHPENIIFDSREANFIAIISKKTGQIVWQIGPNWQQKEVAHISNIIGPHHAHLIPQGLPGAGNILVFDNGGWGGYGSPNPASPDGTKNTLRDYSRVLEINPITLEIEWQFTPEDIRAAIPTDASKFYSPYVSSAQRLPNGNTLIDEGSNGRLIEVTREKEIVWEWIS…
1729	1	1	1	COG3711|COG4668	Transcriptional antiterminator|Mannitol/fructose-specific phosphotransferase system, IIA domain	G|K	G|K	MLLTKRQSFLVQLLEKSHSYITVKELAQKCGCSERTIHYELNNLADYLAENSKVIEKRSGVGVMLTEHVAKNNLTKTSNKTSLHKRRVEIAYQLLFQEKILSYNLLSEKYFVSKTSIKRDLDYINNNIVSLNSNYQGTFIEQQPEALFLAFFRFNEFILSHENKDHVVLLKQYYSSEIVDFCLQELAFFLDKNQNAFAYNDSKNILNHLVIFFFNLNKGIHYTTTQILSKNIRTKTLFSFMKMILSVAKNLSIELENSDVDFLVQYIVFNKSSLIQENENYYHAIIKNLINKMSLIINVDFSKNQFLIERLSSHIPSMLERLKNKIMVKNEFSHELKLNYPEMFNAVIMATEDVFPNIDLNENEVAFITIYFQAALENILTDKRKILLVCSLGNAALAF…
1174	1	1	1	COG4977	Transcriptional regulator GlxA family, contains an amidase domain and an AraC-type DNA-binding HTH domain	K	K	MISAQITQALLAICPKNSIWQTPIDGLFLHHLDSPQMMNGFRQQPSLCMMLMGERQLCIGNECCRFNQDNMSLCPVNTPVTMTVDHATPNKPYFALSLQFDLVMVARIASQLNLHNPINNSIQPQDFLTLFNPNQELINALERLLTLLYAPNFEQKITILAPLYLQEIYYYLLTSPQGDKLCELCRQGSHAERISKATAWLNQHFSEPLDIAQLASLCGMSISGFYQHFRHITQQSPLQYQKNLRLTEAQHQIQQHSAPISQIAYNVGYESPSQFSREYKRYFGRAPSEEI
890	1	0.996899	1	COG3070	Transcriptional regulator of competence genes, TfoX/Sxy family	K	K	MSNIPTINLYEKLTSLLGEIRSKKLFSGIGIFYNDHMFGIYKKGGFYLRAKGDLANQVKSIGAIPWELDGVPSNLKIRDYYLIPGNYLTDNDKSLILVKMIKVSLQQIESEKLADTLERAKRIRNLPNMSLKYERLLGKIGIDTISKLREVGAADAYILVKSQGLFVTSHLFWKTYAALKNKYVELLTEKEKEDGLKEVNEKLNIAGFRAMKYKL
1402	1	1	1	COG1593	TRAP-type C4-dicarboxylate transport system, large permease component	G	G	MVSPVFILYFLIFLLIGVPVLFALGLSPIIALFQDEKVLFINMLYQRLYSGLDSFLLLALPFFMLAGEFMVNGGITNRIITFSQTMVQHLKGGLGHVVILASTLFGALTGSSVAATSAIGKMLIPEMERYKYDRTYAAALTAAATVLGTIIPPSGIMLIYAFVMNTSVAAMFMGGVVPGIILCIGLMLVNRYQIRKYPQVQQFARASSVERRAGFKMAILPLLTPVIILGGIYGGIFTPTEAAAVAVFYALILSVFIMKNLKLKDVYPMFVRVSVNAAAILIIVAAASGFASAVSLSGIANHVTSFLYSITDNKYLLFFIVNIFLFIVGMFLDAGPAILIFAPILAPIMTNVGIDPVHFGVVMVSNLSIGLATPPMGLVLFVASGVSGVPLQKISKAIL…
1401	1	1	1	COG1638	TRAP-type C4-dicarboxylate transport system, periplasmic component	G	G	MKIKKSILISTFLLTIGAAQAAQYKLTVPIVTNLDSYNYQSLLVFKNIAESHSNGEISVEIYPSGQLCGNAKECLAGVQSGMFDYFQTTVPELANYWQSIESFDLPYLLPNDRVAECVYDNQDFIAEVREGILGKTQNLRLMMISNSGGWRNFATTKKVIQKPEDLKGLKLRTVPAAIQQELVKTLGGAPTPIAWPEVYTALSTGMVDGTKNGIVDIVQMKFHESLKHITLDGHAYMGGAWLMNNDKFNSLPDNLKKVILDAVIAQNQYLRSYPKWQEFNAYEEFKKAGGKIYNPTTEEKEAFKKATMPIRDNYLNKANEDGKKWLTKFEQQIHFCETKISKEDQEALK
1403	1	0.997386	1	COG3090	TRAP-type C4-dicarboxylate transport system, small permease component	G	G	MILKNIENILAKVNEPIANTGKRIAGLLLIMMTSIVLLQVFYRYLLGSPLTWTDELSSYLMIYMTYLCLPLIYLTDQNIAMTFLVEKIKGKRISHLVMFFVHIFALLTIAVWIYFGWAFFLKGNVMANSLPFKMYYIYLVPPLLFCITLLQVMQKIISELNNFINYQKIN
891	1	1	1	COG3642	tRNA A-37 threonylcarbamoyl transferase component Bud32	J	J	MTLEQYAQSLCSQHPDKRIYPFEFENKRYWLKQPEKPKGSQRLLKTFPHKAFHREVERLLKLKQKNAPIPHIYIANDNMLVMEDAGLSVSHWLSNRNISSEQKQQILNDSAIALAKLHKQKLIHGRPFVKDILWKDGIVSFVDFEVDAVSNNPIQQQIQDNILFMIGLCREQAITKEQIRQTILTYKNYTEQHIWQTTLNKLRYYRWAYWLLLPFKSIAGKDLKALYLLIEICYKDDILVK
1303	1	0.996333	1	COG0286|COG1382	Type I restriction-modification system, DNA methylase subunit|Prefoldin, chaperonin cofactor	O|V	O|V	MQRRTTLRADFWLFAVWEKCFAHDHEIIQLISQKSYRKSQNCTMAKNKRKIPYAQSQRTYHCSKKRIIFMNKQQLANKLWASANDLRGKMDASEYKNYILGFLFYKFLSEHQEKHLHKEYQITTKEVDASDIATIQEDLGYFIFGADLYATWVENIKNKNWKISAVTDALSHFRENINDSQRDDFEGIFEDVNLTSEKLGSNPAEKETAIRRLIMLLNEINISDSNREYDTFGFIYEYLIAQFAMASGKKAGEFYTPHEVSRIMAMIVANELRHKEHCTVYDPTAGSGSLLFAVGDETNHAKHHHNIKYYGQENNSTTYNIARMNLLMRGVTPANMVLRNADTLKEDWPNGIISGKNDPLFVDCVVANPPYSAKWDNANGQLKDPRFRDYGLAPATKAD…
1912	1	0.995428	1	COG4795	Type II secretory pathway, component PulJ	U	U	MTRFYNGQSLLGLMLSLILSSFLLLVIIQFYSYAQQQNRRQLLQLQLQTELQRALQTMAKDLRRAGFRALSIKVTQENFSLFELDEDGISLAIYPVSNESAVKNNCVLFFYDLDGNGCLGSTAKQCAKDEQNATSEVGRELFGYRQNGLLLESRTYGNKANTKCKKAECQGYLQQNACQDLGWTKMLDEDNYEITDLQLNWLDNSKQYKGLMLYLAGRLKQSPDIQYESSVVIPLLNQPILSE
1569	1	0.661922	0.752127	COG3468	Type V secretory pathway, adhesin AidA	U|M	U|M	MKIVHFKYSALTLALIANFAVTQSALSYSAEIAKT--CNREFCELKDQHIADKPDLSSISITNVKKAILSNISIAHSSNQSGVIDMNNTNVSIDGLTVNSTNPASLWGLRFENSTVTINHAVVNVATKSSDNTPRGMRGALAFESRLSGGDSTTYVSNSSFTNRADQSAVVVLAKNYAIFDEVTLKATGDKSTLFSLQDD-TKLVAKRVTAENTQHQDGLFIHVDTGGLKGDTVKVPYLQDLQFEDSHIHAKQGIQWMDAEGRMTLHLVNSTLTVDDQLVRINQPNDVQNDITTSISLERATLTGGLKKTNSWVDISLTDSNWNVTSDSTVHKLSTLGGASNISFVNNSEGFKTLTITGEYQGAHNFYVNSNISQDQSDKVVLSGKLSNQENSAIFLVS…
2228	1	0.977305	1	COG2226	Ubiquinone/menaquinone biosynthesis C-methylase UbiE	H	H	MAKIRWHAKAAKAFKLPSSWQQLPKGEQYCETLGSYFAKFSPLITGKQLVRLGGLSAELECKMSLPYHFVLSPEISNHLTALSSQNSYSLIQGDLIELPFESQSVDVCISANTLNFMQDPHQLLREIQRILTDDGYLFLSIFNPFSGLLFKQKINQPQNPALPFRHFLPCRIIDWLHLLNFEIIQQQTLGNLFAIVAKKQTYPLSLQPQKQRFEPSKIFQGEPVGAFKGVEKHEI
1206	1	0.819192	0.986405	COG1974	SOS-response transcriptional repressor LexA (RecA-mediated autopeptidase)	T|K	T|K	MKKQWNTYVREKMQQNKMTQEEIAERLKKTQGAIGHWLTGRRTPNINEVAELIKIVGGDKVILNNDGTVEDFDNNVTPVNIKQTHSYPILSSIQAGTFSETFDYSCSTGYEFLESIIETKGEGFFLEVKGQSMEPKFSEGDMILIDTGLQPNPGDYVAAVNGDGEATFKQYKELGEYSEYGNPHFELVPLNPLFPTLSTKLQHIRIIGVAVQRVEYL---
