# Supplementary material for: Isolation and sequence-based characterization of a koala symbiont: Lonepinella koalarum
Source: PeerJ. 2020 Oct 20;8:e10177. doi: 10.7717/peerj.10177 (PMC7583611; doi:10.7717/peerj.10177)
Supplement: Supplemental Information 10 — This table contains the translated amino acid sequences corresponding to Table 3 in the main manuscript. [file peerj-08-10177-s010.xlsx]

## Sheet: Sheet1
Gene caller Ids	COG ID	COG Function	COG Category	AA sequence
1517	COG3971	2-keto-4-pentenoate hydratase	Secondary structure	MSLNLDAKTIEQAAASLRGATNTGRFITPLREQYPNMTLADAYAIQAANTQHAIQAGRRITGRKIGLTSVAVQKQLGVDQPDFGTLFDDLAFGDSQPIPFSLLHQPKVEAEIAFVLGRDLPHERPGFADVLGAIDYAVAAIEVVGSRIENWNIGLVDTVADNASFGAYVLGGTPYSMRGLDLRLAGMAMFRAGEPVSTGAGAACLGHPLNAVVWLARTMTELGTPLRAGDVVLSGALGPMAAVKPGERFEAHIEGLGSVRAVFENDNAEEK
1138	COG2828	2-Methylaconitate cis-trans-isomerase PrpF (2-methyl citrate pathway)	Energy production	MVTQTAIPCMLMRGGTSKGPFFSFDDLPKDIETRNNVLLAALGSPDKRQIDGIGGAHSLTSKVGIVKISDLPNVDLEFLFAQLQPDSDSVNTNVNCGNMLAAVVPFALEKGLIKAQGETTTVRVLTQNTGVLADITVQTPNQTITYDGDAKIDGVPNTHAPIQIRFLDTEGSVCGSLLPTGNVYDEFDLAEFGKLPATCIDNGMPMVLVRAKDVHRTAYEKVAELNQDEQLKQILEQLRIQAGFKMNLGDVSDKNYPKMCLLSEPIQGGNVHTRCFIPHVCHEAIGVLAAVTIATACVIPDTVAYGFSDFNPKKPFSVEHPSGEFSVTLSFNSQGKVESAALLRTARLLMKGEVMISPKIWSQGE
1406	COG2084	3-hydroxyisobutyrate dehydrogenase or related beta-hydroxyacid dehydrogenase	Lipid metabolism	MAHIAFIGLGQMGTPMATNLLHKGHHLRVYDINPTASEKLNALGAYVATSPKDAVLGCEFIITMLPNGKLVNDVIFGNNGAIESINRNSIVIDMSTIHPLESDDIRNRLRSENIEFMDVPVGRTSDHAISGTLLILAGGTKEQIEKASPILLCMGNKIVNTGGPGNGIRVKLINNFMSIALNALSAEATVLCESLNLPLEKALEVMEGTPANKGHFTTTWPNKVLKGDLTPSFMIDLAHKDLSLALDVANQLNVPLFMGAASREIYSQARATGRGKQDWTAILEHLRNCSGLKDD
495	COG0043	3-polyprenyl-4-hydroxybenzoate decarboxylase	Coenzyme metabolism	MAEQTSKPNVYDLRSALALLETLPNELVSTDVEVDPIAELSGVYRYVGAGGTTPRPTKTNGPAMVFNKVKGYPNIRVAIGLNGSRKRVGAFLGCPPERLGFLLKESVEHAIPPVTLNSDVKPACQEVVHLASDPDFDLRTLLPAPTNTIEDAGPYFTMGLCYASDPDTGESDITIHRLCVQSKDELSMWLTPGRHIDAFRQKAEAAGKPLPISISIGVDPAIEVAACFEPPTTPLGYDELAIAGGLRGKAVEMSKCITINERAIAHAEVVIEGELLPDVRVREDQNSNTGKAMPEFPGYTGDAKPALPIIKVKAVTTRHNPILRTTVGPGQEHVNMAGIPTEASILDMVERAMPGRLLNVFAHTSGGGKLLAVMQFKKSAAVDEGRQRQAGLLAFSAFP…
2071	COG1401	5-methylcytosine-specific restriction endonuclease McrBC, GTP-binding regulatory subunit McrB	Defense	MSIKNCFENILTNLNKQKQKEFKNNPMHTVFQRELKPEIERLVKEYDVSLLYKVNASIGNGNWADVPWLSILNTQITATTQSGIYPVYLFKADSSGIYLCLIQGSTALKENYKPKKNYLDEGQRRKNLLLSKYPELKSWNTHSIDLQSKTDLGKSYEDTTIASKYYPAENIPSDEELKQDLYFLLEIYQRMKQDILQLDQISFTPKNNDLFPDETMNTIHISATRIPKPFLILAGISGTGKTRFVREQAKMSKQGESDNYLLVPVRPDWHEPSDLLGYSSRLSGKDEYIITPFLKFMVQAWQEIAKYQADLNAEFSLETLQQIRPFWLCLDEMNLAPVEQYFADYLAILETREWKTQGNNFVYACDAILHQDLFTQFEKLAYDLGLEKDSALYRYFSQN…
2014	COG4597	ABC-type amino acid transport system, permease component	Amino acid metabolism/transport	MKKINFSLNDANTRSWLYQVIILSMIVYVVWYLVDNTLHNLATRNIQTGFAFLNKEAGFAIGESLIEYNLTDTYWHAIRVGILNTLLVSFVGIVLATLLGTIIGIARLSANWLVNKLAAIYVEVMRNIPLLIHLFFWYSLLTENLPGPRQALNPIDGVFLSNRGVKIPALSGDSVSWMLVGLLFAVIATIILSFWAKHKQNKTGKTTAVFSISLAFWVIFPMLAALLSGWQLDVVKPELKGFNFVNGWHFSPELAALLLGLVLYTAAFIAEIVRSGIQSVNKGQWEAGESLGLSRLKTLRLIIMPQAVRVMIPAMSNTFMNFTKNSSLAVAIGYPDIVSIVNTMLTQTGQAIEAVMIIMLAYFTISISIAVFMAWYNKRMALVER
2013	COG0834	ABC-type amino acid transport/signal transduction system, periplasmic component/domain	Signal transduction	MKKLNVLTATVIATVGFTAFSANAQASTLDTVKQRGHVICGTTTGFAGFSAPDDKGEWKGLDIDLCKSVAAAVFGDATKFKTVPLNSQQRFTALQSGEIDVLTRNTTVTQQRDTALGLQSPGVNFYDGQGFLVKKDLGVKSAKELDGATICLQTGTSNENTLADWARASNVKYTPVVFDQFNEVVNAFASGRCDVFSTDASGLASIRISRLSNPDDYVVLPDLISKEPLAPFVRQGDAQWFNIVKWTLQAQFNAEELGVTSKNVDEQLKSENPNIQRLLGVAEGTGKNLGLDDKWAYNIVKQVGNYGESFDRNVGKDSPLQIPRGLNNLWTNGGLHYGLPVR
1160	COG1132	ABC-type multidrug transport system, ATPase and permease component	Defense	MVAAMWSILNPVKKQIYLAIFLAGLAVFANLLVLASLAWSVQALLSHPEQMPYALLSIALLSTVCAYVLRITAFNQSHYASFRLENHLRKQLAEHLAKVPLGYVENMGSGSLAKILMQDVKALHIFVADSTPLYARAYVSPVLTFMLLWWLDWRLSLATVAVLCLGLWLVFNAFSSSQALMQQYNQASENVSKAVVEYVQAMPVVRSFSTAEKSFERYQHALNRYKQVVLQWYRRTGILARLAQLIVSPLPTLTTLLWLGVWLLNQESLNLHHYLMVLLISAGMTESLLPLSSLKHLIGKTEMSVKRIQEVLAEPILPMTTQPQYPQDNSVVFDQVDFRYQQHSPLVLQQVSFTLKPNGITAIVGASGAGKSTVAKLIPRFWDVTSGSIRIGGVDVRHL…
2098	COG1116	ABC-type nitrate/sulfonate/bicarbonate transport system, ATPase component	Inorganic ion transport	MTEQIVKEQVAIEIKNLSKHYQKENSQMTVLDNINLTINKGEFITIVGHSGCGKSTLLKMIAGMVNIDAGSIEVNQQPIEQSNEHCAMIFQESRLFPWLTVSENVGIGLKHLNKQEKYEKINTYLNLVGLKDFENAYPKALSGGMAQRAAIARGLVMNTDILLFDEPFGALDAMTKIQMQNEVLRIRQEEKKTMILVTHDIEEAVYLGDRVVVLSSRPGKIRDIVPIHIDGKKERTHDQFISYKNKIHDYFFEPHRDEIEFYI
2097	COG0715	ABC-type nitrate/sulfonate/bicarbonate transport system, periplasmic component	Inorganic ion transport	MKKCNKQHYTLFFYLAILVVLAFGGINLDDKTSEKNTALSAHHEQKTVRIGFPGISNSTLEAGGIAINQQYFIEELAKVGFKPEIVFFQQAGPALNEALASDKIDVALYGDLPIAILRTKGAPVKVFAIDNSRLQFGTIVQSESPAKNIAALQGEKVIFGKGTVQQRYFKEITQFYGLNPDKFEMVNAVGADANSVFSGQQAEAMFTFYYTVLYMQQKGMGKVIDSTLDKPELSSQSLAVGREIFLQENPQAAVAIIRALQRAKQFASQNPEQVFKIFSQNNIPADIYRQAYSADLSFSNFDPKITQESVNKLSRLIDFLVENKLVNNRINVEELITTEYYERFLQEK
592	COG0600	ABC-type nitrate/sulfonate/bicarbonate transport system, permease component	Inorganic ion transport	MSKTTFNKWAISLAPWVLPVVLLIAWQLAVSSGWLSDRILPAPSTVVAAGWTLLQSGEIWHHLAISGQRAIIGFVIGGSIGLLLGFITGLSKWGERFIDSTVQMIRNVPHLALIPLVILWFGIDETAKVFLVALGTLFPIYINTYHGIRNVDTALVEMARSYGLKSFALFRQVILPGALPSILVGVRFALGLMWLTLIVAETISANSGIGYLAMNAREFLQTDVVVLAILLYAVLGKLADVAARSLERVWLRWHPAYQIKVGE
385	COG4166	ABC-type oligopeptide transport system, periplasmic component	Amino acid metabolism/transport	MNRIKFSKLSITAIFSLICLSACEPNKSNSTQLHPTSPSVTPEQSSSYQADVLVRGVYDPFILQPAEIRQPEQSALLRDLFEGLVIYDPQGNIVAGMAESWESADQKTWIFHLRQNAKWSNGEDVTAQDFVRSWQNLALSDNPQKEFLLYMNMQNAKQVIEQSMPVQQLGVQVLDEHSLQIQLDKSTPYLPKMLAHIALLPSYQATPEQKKAFITNGAYSVVEQTADRIQLSQNPYYSNDHRRAFSKVIYQKIDVQHSSQPIDIIQNVKHKSDNINYFPQLCTYFYEFNFRHPILKQKAVRSALISMIPSDIVSQYPFVMPNGINYLPNNMQFEQQRDFEPTLVEQKLQQAGITEQNPLKLRLTYDNNGLHQQIAEHLIRGWSQSDLIRVQAEPVSYQT…
2016	COG1126	ABC-type polar amino acid transport system, ATPase component	Amino acid metabolism/transport	MSKVMVQLKDVNKWYGDFHVLKNVNLTVTEGEKIVIAGPSGSGKSTLIRCINGLEHHQTGELTVNGVLLNNNLKHLEQIRHNVGMVFQHFNLFPHLTVLENLTLGQIWVLKKRKQDAIDLALKYLERVKIADQAYKYPGQLSGGQQQRVAIARSLCMSPKVMLFDEPTSALDPEMVKEVLDVMVELAEQERITMLCVTHEMGFAQRVADSVVFMDQGMIIEQTAPDEFFRQPKTERGQQFLAQIL
1058	COG4823	Abortive infection bacteriophage resistance protein	Defense	MTYPPQHFLKQWQDYDDLLQLLKQRHMQISDDNKAKQYLERIGYYRLSGYWYPFREINFDESNKQHKLVLKDSFKANTVFAQIIQLYVFDKKLRLLALDALERIEMAVRNDVVYLLGKQNPLAYQQAECLHGNFSKRLAKNKDKTAHQIWLEKLQAHIGRSHKHPAICHYREKYQGQLPIWVVAEVWDFGLLSHLFAGMKKQDQDIIAGKYGTTAKTLEKWLKSLNFIRNIAAHHARLWNVNILELSPTPPQWQNIPNEKPFLYFCIMQLLLNKICPNSTWSERFTALMADFPTLSNQAISLHAFGLLENWQDLAIWKKENQHVQQNC
1519	COG4569	Acetaldehyde dehydrogenase (acetylating)	Secondary structure	MSEKKIKVAIIGSGNIGTDLLMKILRHGKHLEAAVLVGIDPNSDGLARAAKLGVATTYQGVQGLIEMNEFADIDIVFDATSATAHVKNDAALRAVKPNIRLIDLTPAAIGPYCVPVVNLEQHVNQQNVNMVTCGGQATIPMVAAVSQVTKVHYAEIVAAISSKSAGPGTRANIDEFTETTSKAIEVIGGAEKGKAMIVLNPAEPPVMMRDTVYTLSDLADEQAIRESVERMAAAVQSYVPGYRLKQQVQFEHLEKPVFIEGLGRVAGLKTSIFIEVEGAAHYLPAYAGNLDIMTSAALATAERMAQSLLNTEK
195	COG4992	Acetylornithine/succinyldiaminopimelate/putrescine aminotransferase	Amino acid metabolism/transport	MTKLSTQIIDQTEQYGATNYLPLPIVISKAKDIWVYDPEGNRYLDMLSAYSAVNQGHCHPKIIKALTEQAAKVTLTSRAFHNDQLGVWYEKICKLCNKSMALPMNTGAEAVETAVKAARRWGYDVKGVTDNQAEIIACVGNFHGRTMTAVSLSSEKSYQRGFGPLLGGIKLIPYGDLEALKQAITPNTVGFLVEPIQGEAGIVVPPQGFLKQAVTLCQQHNILFIADEIQAGLGRTGRLFACDWEDVVPDMYILGKALGGGVFPISCVVANRDILGVFTPGSHGSTFGGNPLACAVSIAALDVLQQENLIERSQQLGEYFLAGLQKINHPRIKQVRGRGLFIGVELHEAARPYCEQLKEKGLLCKETHDTVIRFAPPLTISQQDLDWALSRIREVLG
9	COG1048	Aconitase A	Energy production	MNNSKAKCIKQLSLQGKQYHYSGLAELDADKVAKLPFSIRILLENVLRNHDDFSITQEHIDTLLNWSPEPVDKDIPFKPARILMQDFTGVPAVVDMASLRTEYVRHGKDGEKINPAIPVDLVIDHSVQVDFFGTDAAYDKNVSLEFERNKERYELLKWAQKGLKNFTVVPPGMGICHQVNLEYLAQGVIARDGWLFPDTLVGTDSHTPMVNGIGVIAWGVGGIEAEAAMLGQPIFFTCPEVIGLKLTGSIPDHCTATDMVLSITKVLRDKGVVGKFVEVFGDGLDSLSVTDRATISNMSPEFGCTVTYFPIDDRTLEYMHETNRTPAQIELVEKYCKENLLWRTGREDITYSSVVEFDLNSLVPTVSGPKRPQDKVLVKNLGDTVTTLLDNEYHRQTLH…
1721	COG0318	Acyl-CoA synthetase (AMP-forming)/AMP-acid ligase II	Lipid metabolism	MIWDYIKDKLLSVDLVNRHYELLFDGYNNLYECFYKIYLEQKDELFVVYDNEDFTYGNIYILIETICSNLERRYGNNKPLNVGVLLDSSVYYICFLLAINKMGWISILYPTKYGSYEINDLIKIIDIDLLISETNFNDVIDGLDKDVECLNFKDCLLECDLCVIKATSERYYNFLDIETLEKDAIIMFTSGTTSHSKASVIKNFNLVHAIETYKNIFQLSKYDSTLLATPIYNITGIVGIFSTIMSCGGIIYLHSKFNIDNLVDGLKRFKITYFHSSSVVLKKIIESSKSKVFNNIRLVACGSSMLSSNDINRIKAIMPNASIRVIYGLTESSSPGAIFPVDIYKHNKINSSGIAIPGLEIKIIDDYFRDVGFNTIGEIGIKGTNVITRYIPDNNELIN…
1057	COG2189	Adenine specific DNA methylase Mod	Replication/Repair	MEILDKSKTVQIMNSTAQHSTA---------------QHSTAQLTNLISKLKEIFQINQPDLDFGIYRILNSRSKEISQFLEKTLPEKIGNALGQNINQETAVYNHLYEFFSRYYDSGDFVSLRRYKGNTYAIPYAGEEVMLHWANKDQYYTKSGENFSNYAFYLADDKRVQFRLVEADTNKDNRKDNEQKRLFVLSEQPIEETAENLVIPFEYKALGKNDKQADYIDQAVEQLKSHPFANAVWQELFRLAPTEKDAKRTLLKKYLQDYTTKNTADYFIHKNLGAFLSGELDFYIKNEVMNLDDIQTETAFAEIEQNLQLIKIFKQVAQEIIAFLAQLEDFQKKLWLKKKFVTAVYYLITLDKLPDTLAEIALKNEQQIKQWQTLFNMDASGENLQNLR…
1023	COG0859	ADP-heptose:LPS heptosyltransferase	Cell wall	MSLFKNLLLACLPNRRKNPIHESVLHEVKSILFRPLGRAFGDACVHTAHLQQIRQIYPKAKIAVWVGPSNRAIFEACGVVDELIEIKIGNCFKQRKKWDLLLDFENNFNTSSLIMDLISAPKYLMIFRKYEKKHYHFNNVKHFDFNANLGEKVLFSKYVNQSILAKMATLNPAHSVVHTSPSNDEKMQKYWQSCVANNIVAKSINILLCLQGSSREVPAVEIAEILNKSITQPQFFQIVVSFTSAAERYQQELQALCPDLTIHLSPKTSAAEYFSLMKKADLVFAVNGGSLHLACAFDKPLLSFHANSEPTLSAWKPLLPANIPQCYLVARNPLRIHTGVDETYNFDTAKAIAWLKQFIQAQNLA
1373	COG1397	ADP-ribosylglycohydrolase	Post-translation	MSFCYSGVNMKNRIAGALYGQALGDAMGMPSELWSKKYIEEFFGGLITEMLDGPAENEVATNYIKGQFTDDTGQALVLLDSLASTNYIPNTKDVAQRLLEWSERENAFQNNILGPTTKLALTDFREGKNPSKVTNSALSNGSAMRIGPIGAMFYPEQKEKLVDYVYDLSCATHSSDIAIAGAAMIAVGVASAIVNDDFEKVVDDILAIEPIGYAKGAETFSPRLNERVKIGIEIARKYKEQDSIFLQKIYDIVGTGVQIIESVPAAISVAYYARNPNHSAFLCANMGGDTDTIGAMATAICGAFTGVSVIHSHYIEMLHKQNNINFNTYIDILIKGREKLK
311	COG1454	Alcohol dehydrogenase, class IV	Energy production	MTNATESLVLRTTFTTRNFHGWGCLSVLPDEVARLGAKNVLIITDPFLAQSGLAQQIVQTLQQIGVSSVVNSDVVAEPPLAVAEQLVQFARQQNADLVIGLGGGSALDLAKLVAVLATQDGNVADYLNLTGLKILSSQGLAKIMIPTTAGTGSEVTNISVLSLASSKDVVVHDYLLADSVIVDPQLTVSVPARVTAATGIDALTHAIEAYVSVNATPISEGLSLQAIKLIARSLDKAVKNGNDRQARIDMSYGSYLAGLAFFNAGCAAVHALAYPLGGQFHIAHGESNAVLLYYVMGYIRSACAEKLKDIYQAMGFDVANLSAEEASKKCIIALKELVNTVSIPATLQDFNIPQDALDALSNDAIKQTRLLQRSPMLLSLQDIQAIYQSAFNGKGFI
1408	COG1501	Alpha-glucosidase, glycosyl hydrolase family GH31	Carbohydrate metabolism/transport	MKLNQIENGFELFYKQKSILCHTTQHPAFFVGIGEEKIASYRGNFQIEDRIIERLPLKYSTIKENTIYLSYDEKTPFQLKIQISPRSDRDLILTIQSMNPSLNRFWLRLVADENEKVWGGGEQMSYFNMKGRHFPLWTSEPGVGRDKTTEITFLSDKYHKAGGDYYHTNYPQPTFISSQHYACHINSTAYSEFDFRHTDYHELHSWEIPKSIEIYTGDTFLTIVEKLSLRFGRQPKLPEWIYNGVILGLKGGEKNSFSRLDNARAKGVPVAGIWCEDWAGVRQTSFGKRLFWDWKWNPKRYPNLAKKIKQLKQQNIRFLAYVSPYLCDDGELFPIAKEKGLFALNAQKEVALVDFGEFYCGVLDFTNPKTREWFKQEIIQKNMLDLGVSGWMADFGEYL…
1251	COG3534	Alpha-L-arabinofuranosidase|Alpha-L-arabinofuranosidase	Carbohydrate metabolism/transport	MKNQCHNPYLPLYEHIPDAEPRVFNDRLYVFGSHDQENGNEFCELDYVAWSAPINDLSDWRYDGVIYRKQDDPDNQAGLPLYAPDVVQGKDRRFYLYYCVKFQDAICVAVCDTPAGKYQFYGKIQYPDGTIMSDNQPYDPSVICSEDGNFLYFGFAPCMINIPRYKGQDLKGGSVVELEDDMLTVKGKPQIVIPSLIYSKGTSFAGNEYFEAPSVRKINDKYYLIYSSVNTHQLCYAISYKPMQGFVFGGVIVSNGDVSYQGRSEQDKLMSVGNNHGGLVQIHDQWYIFYHRHTSLTQYNRQGCAEKIYFEPDGQIKQVTITTSGMNPMPLSGNAFYPAVYCCNLSNGRMGALTSLGRTNSEVDFPYITTENGERYITNVQDNNLIGYKYINLAETQDI…
1159	COG2207	AraC-type DNA-binding domain and AraC-containing proteins	Transcription	MHHLNKPLLLQPTKLPEHILQAIPQDWQQSLNIYSPCRDLTLHSVNASSRHPWLFQSEGEAALNLCFLLAGKMRTGFHDGGTYHVNAGSAVFMLSNQHTQGWNEFVSQQNHDFRMLNIHIPKSAIESLIGVEMSLLRQQSHSIFGHSGEQQHLDALMTCVPISLSLQSRISELLTSFQQTAPHQVIGNLYCRAKILELIALFLQENICQQTISLPVPCDRKRLMQARYLLEKEYAQDWCVADLAARVGLNEKRLQTGFKALYGKSVYAFLIHTRIQAAVILLQQGVSVTDTATMVGFSHLSHFSRVFREHIGVSPKQLV
48	COG1074	ATP-dependent exoDNAse (exonuclease V) beta subunit (contains helicase and exonuclease domains)	Replication/Repair	MPKATALNANSTPLTHTTLIEASAGTGKTYTMASLYIRLLLQAGENNFSRPLSVEEILVVTFTEASTQELKERIRQRIHLCKKQLEQYRETQDKKAFADNQPLAELVDYIDDIDLAIQRLRLAEQNMDLAAIYTIHSFCRRVLTQYAFYSGIHFELELVKDETELLKRFANEFWREHFYSLPYECTDFIHRWLGSPSAVLNHIRQYVSGDPLKVAINSPQLLEHDLSEFLQQYVQNGLQQIQQLKQQWRESAVEIRQLIENETAKKYAKGEKKRLKRTSFKSNTVPNWLNQMESWADDVYQLDFPDCIKYFSQQNLNTDYVEEGAEPMTHVVFEQVDKVRNIDFTLYYHIVLYHYMQALNQKMTAYKLDHAEKSFDDLLRLLRDALYAKQGNELAHRIR…
47	COG0507	ATP-dependent exoDNAse (exonuclease V), alpha subunit, helicase superfamily I	Replication/Repair	MLNLLFSLCQQQRISQADFYFAKLIADKQQGLGYSEQQQALAILVAGLCQYSLSQGNTCLFLDRDLANNYFGLRYIKTDDGIDYVAEINQKIANLPLHQWANMLQDHIAFTLSPQEKIAPLVLQHNALYFYRTWQDEYRLADYIKTAVQKPQDFLLPQVKACLARYFEQTTATTNWQKVAVAVALRQSFCLISGGPGTGKTYTVARLLAVLQKLHQGKLKIGLAAPTGKAAARLSESIEKELNSRSLQPLLIEDAIQHNMPSSAQTLHSLLGVRPFSEKTVYHAQNPLPYDVLIIDEASMIDLSLMNKVREALAPHCKLILLGDKDQLSSVEAGAILGELGQFMGLYFDPKRQKNIGCYDKEFTEYLTAVTGEILIASETSLSSIANCLCYLPDSRRFD…
1643	COG2723	Beta-glucosidase/6-phospho-beta-glucosidase/beta-galactosidase	Carbohydrate metabolism/transport	MSKFPKDFLWGGATAANQIEGGWDEDGKGLAGSDMVAYVPKEIRGLKSAAIDVSSDRIDEILSGKFEGRFPKRHGIDFYHKYKDDIALFGEMGFKCFRISIHWARIFPNGYDEQPNEAGLKYYDDMFDEMHKHGIEPMVTLSHYETPLGLTQKYNGWLGREVIAHFVRYAKTVFNRYKGKVKYWLTFNEINMVTMHSAYCGAGVVLDRVEASQQESAKYQALHHQFLASSLATKALHEIDPNAKIGCMLARLHHYALTADPADQRQAQWGNQQNLFFTDVHARGEYPKYMLRHWAENNVQIQKEVGDDEILKQHTVDYISFSYYMSLAVTTHPQEDGDIGGNLLHGVKNPYLKASDWGWQIDPVGLRITLNDMYDRYQKPLFIVENGLGAYDQVENGKI…
815	COG3659	Carbohydrate-selective porin OprB	Cell wall	MKINTSKLMQGLCYSMLMLGATTTVQAETETQKPLSDVGNWLEQHGIKPHLMSSYLYFDNFDMGIQKGKNEQLVIVMAGFDADLQKLASIKGGHLHFSYAWAPYHKNFDFGFQAGDILVGNPPPYIPKVAHLTKLTYEQKLFDDRLSIEVGRSNPGFYYGKSLCNFEFSCVNPLLHKTATFSPVIYSAWGGRVAYNLSPSLELSASGWRTYQDFPFTNGWESGWNDKHATGNLWLASLARKEEWRNSQSKYPLTWELTFFHNTHRFVDVDPLVTDKKQLSGTTGMHAGVKKLFWRLDGGSETHPSATTLSAYASVSRMFDDVTYGGLSTFASTGVILSGPFKSRPMDSYGLNFNWAKVTNGQQRAMTAGYAGMENWHARKNQYQLSLDATIPALPFLIM…
1526	COG0346	Catechol 2,3-dioxygenase or other lactoylglutathione lyase family enzyme	Secondary structure	MNTTFSQNTLPPEPIFDIASISAFELFSPNVDETVWFFKDLLGMIETGRDGESVYLRGWQDPYKHSLKVTYRDQPGMGYTAWRTTSPQALERRVKSIESSGLGRGWVEPEGGIGRAYEFTLPDGAVLRIHWDVEYYRPEQEEKSVVLNRIQRRPLRGIPVRRLDHINILSHNVSENHHFLREHLGLKLSEHIVFSDNTEVAAWLRCMHRSHDIALVQDAAGPGGRLHHVAFLYGNTQHLMDICEVVTDCGLEMEAGPASHAVSQAQFVYVLEPGGNRIELVGVPGYIIEDPAWEPVLWSQDQLDNAIIWYGAPLPKEFDTYGTPHYGPTNYRTPNRYIAAEAVHLLGGKEQ
1025	COG3087	Cell division protein FtsN	Cell cycle	MAQRDYAARSGSKKKKSANKSRLLAIAIGVVVAFVLALYLLKEKAPEPVKQNTPSVVSEAKDKHKSQLPSKLEETFSYIKELESRSITNSQPAQLSEAQKAELKRLQEEEQARQAALEKLKQTESTNMTMTPNAGVQVVDAKLTDSATESAVSDEAKLTAEQERKVAEQKKLADQRKKEEERKLAEQKKAESKKVDSAKSAGKFGLQCGAFNDRAKAESLQARLAMAGLNARITESGKWNRVLIGPIGDRPAAASAQQQASAIAGCVIIGM
1965	COG3115	Cell division protein ZipA, interacts with FtsZ	Cell cycle	MDLNTILIILGILALIGLVAHGIWSNRREKSQYFNHANNFNRGQHIQRKPEQSLTDYAQAPVTPMQKHQPIASQPVKNTKMNIPQPEPIQTDTPVAAPVQANSVEQIKITLPESGTAQPESEQVYYEYRPEPKQPKENMAEYTLADALDYAGTDAQVDMSSPELRVQLQEVSSPISEPKLQQPIENNTEQAVQEPVTQEQQPTDFILLYVVAPENRQFLGLSIAQSLDNLGFILGKDNLYHRHVDTVASPVMFSVANIEQPGTFNPYAMNEFSTIGLALFMQVPSQVGNDKANLKMMIQAAKNLAEELNGFVLTDQQAIFDDKQEQDYLDRV
2379	COG1917	Cupin domain protein related to quercetin dioxygenase	Prediction	MKKVLSLLAITTFALAHQAIAQESSPTTVKIETGTQAGKVLTEKGRVFVNQSGTVVHGFFKAGDKMKRHNHDGYELFFTVLKGKANIVLDDKETHPINAGEILYFNGKHFINADFPEETEVLISLIKE
818	COG2807	Cyanate permease	Inorganic ion transport	MQSVKTRRSRMKWVMFFAFLTLSLNLRAPITSLPPVISEIKASLAMSPVFAGVLTTIPVLCFGLFTPFASKIIGKMGIENSVMLSLMGVTLGSILRAVGDTGFMLSGTIIIGLSLTIGNLLGLLIIARDFKSNASFMTGMMVLGMSLGGMITSSLTVPMSHLLDWRWALASWSLLALLSLFLWIPRYRREKAKNDRLAIRIEESAVKKSTISLSQFSREHVSAIIALTVSFSCHCFAFYGVVAWLPSFLVEFAQMSSDKAGVVVSIFHLLGFIGCLGMPLLGKWFKLSQKWLFIIDGLAWFLVPVGFYLLPDWWLLWDIMGGIGCGGAYVVIFSLIISKSSSLEENRYTSSVVQSIGYVMASLSPMIIGGLYQLSGAWLVSFVVLAITTLIFLIGGLLA…
2004	COG0295	Cytidine deaminase	Nucleotide metabolism/transport	MKKQLNINYESFESYNELNDIEQKLFNVAKQARKKAYAPYSHFLVGSAVLLENGEIIAGNNQENAAYPSGLCAERTAIYWASANYPKQKILKIFVVGAPQDEMKNSPVPPCGACRQSILEYETKQSQNIEIYFSSVSGEIFKTYSIKDLLPFNFDVSFL
1462	COG3381	Cytoplasmic chaperone TorD involved in molybdoenzyme TorA maturation	Post-translation	MQTELLTQINIASKMLGALLYYSPDDAKVRSILAFFQQADWAKEWQQATGVATNSTSVSHIEQGLQRTDEELVQQYQMLFIGPNTLLAPPWGSVYLDPEAVIFGSSLLTLRQFLRQHRINFIAPSEEPEDHIGLMLMLTAYLAEQQPELLAEYLTEHLLPWSTRYFELLASSDSLFYQGVAQLCQQTLSYWQQQLGLTTNKVRLFF
2123	COG1426	Cytoskeletal protein RodZ, contains Xre-like HTH and DUF4115 domains	Cell cycle	MDTQINSAERITVGETFRQARQKLNLTIEQAAEKVNLRPIVVESIENNEFVQKNIPATFMKGYVRNYAEFLKLPDSLWKDGAIDFGGVVRNDLNKHVKVKKVVNPHSSHGRWVGWLTALVLLFVIGMTALWWWENYQQTNSERDNLVQNYVSTEGQNKALEHSDHVATMTETTIVDSAQANAQIVESAVQNNPENNSNAMTSTAINPQEKENTTESVDSPAQGILMQHSVNDNVDTTDSIATDNHTQNTVDNPVSGDLQIEVTTATSWIAVRDAKRHNLVAQKEYKQGEVITLDGKGPYALTIGAPANVKITYKGENYPLKIDGRVARIKLP
72	COG0019	Diaminopimelate decarboxylase	Amino acid metabolism/transport	MKISQYFTQQKWQKLLQAGEQKQTPYLVIDLAYIKEKYAEMISLFPKAKIHYAMKASPAVEVVSLLADLGSNFDCASIYELDRVLGCGVEPERISYGNTIKKPAHVQYAYEKGIRLYATDSKADLKNIAQYAPGSKIFVRILVQGSDTAEWPLSRKFGCHPDMAVDLLVQAQKLGLEPYGISFHVGSQQKDVAAWDDALAKVKYMFDWMKYEEDIKLKMINLGGGFPTNYLSEVNPIKIYAQEIHRYLQEDYDEDEMPDIILEPGRSLVGGSGVLVSEVVLISRKSRTDLTRWVYLDVGLFGGLIETLGEAIKYPIYTPKMETENEQGTVILAGPTCDSTDIMYENAGYKLPQNLEVGDKVYWLTTGAYTNSYSSVEFNGFPPLTVIYTDTDKE
1182	COG0412	Dienelactone hydrolase	Secondary structure	MNNINKDQLNPEIFKLYNDYAHSRMTKREFLNKLSVYAVGGLTVANLINFLLPNYAMAIQVPESDNRLKVQTIQYDSPQGGGKISAQLAMPSNIQGKLGAVVVVHENRGLNPYIADVGRRAALAGFITLAPDALSPLGGYPGDDDKGREMQASRDRDEMLRDFLAAITYLQQHPQSNGKVGIVGFCFGGWVSNMAAAEVPDLAAAVPYYGRQAPLEVVPQINAPLLLHFAEHDDGVNSGWSDYEQALQQHNKRYLAYHYAGTNHGFHNDSTPRFDKAAAELSWQRTLAFLGEHLR
1515	COG0329	Dihydrodipicolinate synthase/N-acetylneuraminate lyase	Amino acid metabolism/transport	MIFEGVNSPVITIMTDDGKIDYPNMGKHINRLINAGLNGLLFFGSLGEFYGISLAEKKEFIDWVVKVVNKRTQVIIGIGDTSLDNVLDLARYSEKAGVDALNIVSTYYFGLNEQSTVSYFAKVAEAVKLPIMLYNFPDRTGNDLTPELVCELAEKYPNIIGIKDTVDNISHTRRLCQKIKPIRPDFSILSGFDEYYLVNRISGGDGVLCGLTNVIPEDFVQFHKAFEAKDFVTMEKMGKKISYLMQLYQITPLFIVAIKSAVKISSGLDMSLYTKAPASPLTKEQEEKIKTILLEAN
1513	COG0129	Dihydroxyacid dehydratase/phosphogluconate dehydratase	Carbohydrate metabolism/transport	MSIETLFSNQDPKIFNARTHADGPNGKLPLTPEFLRSAPSGNIFGMTVNAGMGWNPDTLANGDFMIISTQGGIRRDNGTTTAVGLHNGHFELGLLMSEAADVIKQMGGVPHAAFVTDPCDGRSQGTIGMFDSLPYRNDAAIVMRRLIRSLPTRKAVIGVASCDKGLPAMMMALAGQKNDTTILIPGGATLAPNNGEDLGTVQTIGVRYANNEISFDYATRVGCSACASAGGGCQFFGTAGTSQVIAESLGLSLTHSALAPSGEEIWYEIARNSATAALELVVKGIKTKDILTDKAIENAMVLHAAFGGSTNLLLHLPAIAHAAGLKMPQVADWSKVNKEVPRLVSVLPIGPVNYPTVYGFMAGGVPEVMLHLRKLGLLHEDVLTVTGSRLGENLDWWEQ…
45	COG3104	Dipeptide/tripeptide permease	Amino acid metabolism/transport	MQQKTFFGHPYALSSIFHIELWERFSFYGMKAILFLYLYYEYSQGGLGIDKNIAGGIVGAYGGSVYLSCLVGGWVADRVLGAERTLFYSGIVVMCGHIILALVPGLEGLILGMICIALGSGGVKTTASATLGTLYETDDTRHMRDAGFSIFYIAINIGALLGPLLSGILQHSYGFHYGFGAAAVGMAFGLWMYSRGRKNLPPSPVPNPLNKKEQKQASFSWLALIAIVMVTIFSGFLTLQNFPRILLVCVICLTIGYFARLLMSHQVENKGNIVAFIPLFITISIFWSLWAQFDTAMILYFEQTIDRHFFNFEVPVAWLGSLQSLWVILIAGLLATLWTKMGDKQPKTPLKFAISMLALGVTYFAFSLMVSAQGSSFLLFFFFILLITISELLLSPVSL…
793	COG0863	DNA modification methylase|23S rRNA G2069 N7-methylase RlmK or C1962 C5-methylase RlmI	Transcription	MEQLSCQLFHSDCQIIMRDLANKNQQVDHIITDPPYAISQHNNFHTLNNPRKGVDFGTWDWGFDPAFWLESAYPLLASNGSMIIFCSYRFISQITHKIESLGGVVKDIMVWQKANPMPRNIHRRYVQDMEFIIWAVKSKKSKWVFNKPEDKPYQRGFFQTPTLLGKERTAHPTQKPIRLMHEIIKIHTHPGQLIFDPFMGVGSTGVASLDLNRRFLGCEQDLQWFELAQIRLNLG
1404	COG1349	DNA-binding transcriptional regulator of sugar metabolism, DeoR/GlpR family	Carbohydrate metabolism/transport	MTINTIKYTELTGNPRHDKLISLVQSNGYISNEELAHTLGVTTQTIRRDIKTLSQNGFISRHHGGAGRVSSITNTEFSIRETIHTEEKTLIANEISNYILDGSTLFITIGTTVEFIARALESKNNLRIITNSLRVANLLYINKNFEVITVGGMLRSHNGGIIGPNVVSFINHFRADYLITSLGAIANDGTLLDFDINEVAVVKAMLHNSKKVLIAADHSKFHTSAAVEIDTLRNNMVLFTDEKPPTEIMRIIREKKVELHTVKKHI
1662	COG2944	DNA-binding transcriptional regulator YiaG, XRE-type HTH domain	Transcription	MKCIECDSGEYIHDVRDMPYIYKGKKTVIPAVSGRYCSHCDAVLVDNVDAQRVSEAMIEFNKQVNATLADPLYIQRVRKKLKLDQRQASQIFGGGVTAFSRYETGKATPPVALVKLLKILDKHPDLLAEVV
1192	COG1309	DNA-binding transcriptional regulator, AcrR family	Transcription	MTASKTDLRIIRSHKLIRQGLIELLNQKSYHDINVQDILDAAMVNRSTFYTYYSGKDDLVGQMILDLKTEIKQLIEQRQQAENLEHFFEIAMPKWYELRHLLLALWKVYTPRHHLFDDMVKMFQQSFIQLAQGKSVSEQDLPLQSLLFAHSFLTAIRFFFEKDEKPNAKKIMTLWQNTLDIASEKKG
1370	COG2188	DNA-binding transcriptional regulator, GntR family	Transcription	MTKYEQIINDIKNKITRREYTENQVLPSEKEMCEYYSVSRITVRKAVNDLVNEGILYRVGRKGCFVKESANTKLSHVYSFTDAILNQGKIPTKRQLSFSKEKAGVTYAKLLGITEDESVYVIKSLYFANNQPYCINTSVLPESLFPKLEYFNFNDRSLYDVLKHFYHLHIVRKTQYITAIKGTEDIDTLLEIKNSNVPLLRVKATTFCIIDGVEKAFEYYDAYLTDILYYYVE
1512	COG1414	DNA-binding transcriptional regulator, IclR family	Transcription	MYHKPTERVLSVFTHLANWREGRTLTDLANSLNIPKSTISPILQEMVYQNYLYLDNQTNKYHIGITTHAIASYYDPLQEIFTHIQREMKNITAKTNEICQLGILEGPNVLYIAKEEPTSNLEIQIISYVGKLIPAYCTALGKSLLAGYDISQLKDLYPNGLLAQTENTITDINKLKKQLDNFSVENIFYEEEEVTPYLCCYATPINLHNNQRIALSISLPVFRVNETKKTLIKKLLLQAREKFNVINKELSV
309	COG1609	DNA-binding transcriptional regulator, LacI/PurR family	Transcription	MPSSKDVAKKAGVSQATVSRVLNYPELVKEKTREKILKAIDELGYIPDANARSLVSKKTYAISLISGPLSNPFYVDTTTHIVNYATSLGYKVNVHFSTVENAKSIYELALSHKIDGLIMSCVLLNDPIVEQLQKLGLPFVSFNRRHNNVGQFVEIDNFAAGVQALQHLLDYGHKDILWIGASDIVSTFKNRFLGFKQGLKQLKKQEIKVRSINYKHLDRPDLKKLLQRLHQSGKLPTAICAATDAIAIDAMDVLVSLGLKVPQDISVIGIDNVELSQNHLIQLTTVGNKDNLCLGLMAIKKLIEMIETEPNAQDDFRITLPVSLFLRGSTQKI
1137	COG0583	DNA-binding transcriptional regulator, LysR family	Transcription	MDLKQLKYFIKVAELGSYTKAAEQFNVAQPLLSRQIRQLEVELKQNLFIRNGRGVCTTEAGNILLKHSYAIFAQLDNLQEDLNLAQGKISGTITLGIPPTLSKLFAKNIIRRFYSQLPEANLVVVEAFTANLQERITNNRLNVALLHNPPFQSGIDYDLLTQVQLELITRKDNPLAQKSQIELDDFQQIPLILPTQGNTFRQLFDNEMTKLHRKSNVVLEVDSKELVLDLVEDGLGNSILLPMVLALGQAHPQLTAVKIAQPQLPCHLYMATANKTKPSRLQTALVKIIKDVCLCYFPNSNSKNI
696	COG1695	DNA-binding transcriptional regulator, PadR family	Transcription	MNTTKKFTGKRTLKYAILGLLSRQPMTGYDITCEFQQAIGQFWQAKHSQIYPELKKLLIENLISQQIEMKGELEKKCYQLTELGKQALEQWLCQLDEIESEKDVFALRLYFLHAMPKTQLSTLFTHQLEQKQARLAFLHQQLATHFSENFDVITLNDNDFAHYLVLSKAIAREQSYYDWLVRSWQKVLRRQA
1573	COG0251	Enamine deaminase RidA, house cleaning of reactive enamine intermediates	Defense	MMDTQKIQATLDSIGEWYDRDITEPNFDLQLSLYCKMAALELCGWLEEVYDNVIISFLHRKGLSEKEIENFEKSYVRKVHGLSYSEHFRRLMIDTLGYTVVLDIESKTPKLEALISNLDTLHKYRNCMAHRQYFDYREKIPIKAQQQIISPSGIKSIFEAINPILKEIVDKIDIL
2005	COG2382	Enterochelin esterase or related enzyme	Inorganic ion transport	MMKKITALLLMSMSTFAYSQSISLQNGDFVKGEFTVTDKDGADLAVVFADKSERRLVQNVVGKKEFVFKAEQTGTADFVIYSSQGKKAEIQQDQIQILQQIPVEKQNALPTKYLSTKIQQLAEQITEQNKTALLDEFWQQVTKQGTPLIEPVENTDENVVTFLWRGAKHNVWLWGSPSREDHHDQLERLFDSDIWFKSYQLPNDSLVSYGFAPDVPTLPVSQGEQRRAMLATLQADPFNPHTYPAKPKYPQDRFSYESVLKLKNTPQSPWLEAQSVAQGTLQSYSFHSQILGNERHIRIYLPTHFNPNNPDLHLLFLFDGAEYVAKVATPTILDNLIAQGKIPPTVAVFIDNPTTQARRTELPPNPNFANMLATELYPWVSQQLGIKIAAKHTALAGSS…
1134	COG3312	FoF1-type ATP synthase assembly protein I	Energy production	MSAVLQRAQKLYKKVYLIEIIVLIAIFGILFLYNNDFAYAFSIGFLVIFVPSVFVIYIAFFVKKGKPIDITLFYRLEAIKFLFAIILIVISIKYLITNNILVFFIGFFVALALNSLLPFILNIFKQRN
234	COG3301	Formate-dependent nitrite reductase, membrane component NrfD	Inorganic ion transport	MINEILVEPQHVAWLPWAASYFFFIGLAATAVAGAVMMRYVKQASSQQELIAVAVALTCAIVAPIALTADLHQPTRVWHFYTVLTYWSLMWWGAYILPFFTMTVAAYFLLLFYQVKQPMTAKLAARLTIWLHWVRGLVLISVAAILFYTCMEVYQVQARPLWHNPWFAPLIIFSALPTSMLLIQWTVKLRTQQNLAYLRHWALFSLTLFILALIGLCTASGDIADQLTQLYQQKTLPIFTAVFALVIAGWLLLPPFRFSLGLSVIFALIFTGMVRWVLFIQVQTLAKYNALANPYHFEWNADGGLGMLSMLGLWALVSVLMWQLLNMTKTPTEQKMATLNKLHSTPHNTQTGVLS
1410	COG2017	Galactose mutarotase or related enzyme	Carbohydrate metabolism/transport	MLRYTVMNIKIETFGQVNGERVDLIHLSNQNGMLVKITNYGCIVTSIETQDCQGHFKDIVLGFDTLNEYLQGHPFFGAVVGRYANRINHGLFKIKDQIYQLEKNELSTSQHIHGGSVGFDKYIWNYSIEKNETLIMIHFYRLSPNGESGYPGNLNITHSIGLDEQNQLHFYFTATTDQTTIINLTNHSYYNLSGHDQGYICHHYLKIFSDYYTPVAQNMIPTGEILSVKHTGLDFRKAIKIGDNMDKLKDKTLDHNFILNGEVAYDEYHKAAELYDPESGRFLTVITTQPAIQVYNAAKLSNKCWMGKNQYKYESFAAICLETQHFPDSPNHRHFPNTLLEPDQIYKQKTIYQFSVKDNQG
1593	COG0625	Glutathione S-transferase	Post-translation	MKLKLHYLDRSRAMRVTWLLEHIGLPYELIPHKRQENMHAPEALKDIHPLGKAPLLEIDGKVITESVAMVEWIIANHAPQLAPATDSPEYADYLQWLQFSESTAMIPLVLKFIAAREPTPPQNTLAYADSEIEKVYDYVNRQLANKRYIMGDKLTGADFALAFSLIFMKMVYQGKFTHIDRYLADLNQLPSWQKAQQIEQQVLQGK
2130	COG0435	Glutathionyl-hydroquinone reductase	Energy production	MTTTPRYRPSEIENEVDEKGYFHRQKNRFTASFGEDANQNPIESGRYRLIWAETCHWSNRAAIVIELLGLEKAISVNKVGINSGFSREKSLGWEFIYDENHHDPVLGVQYLSELYYNADPNYQGRPTVPALVDITTKKVVNNDYTWLTNYLERDFKAFHKAHAPDLYPEHLRQQIDEFNNFLFDNVNNAVYKAMFAQSIDAYNDAYNSLYCALDLIEQRLETKRFLFGDFVTDADIRLFVTLARFDAGYAKNLGPLRNRIVDFKNIWGYARDLYEIPAFKHNTYFKTFAKKQGDRSGVFIDYYTRFWDKIDYEALWSEPHQRQTLSQTPDEKFIY
763	COG0371	Glycerol dehydrogenase or related enzyme, iron-containing ADH family	Energy production	MDLRSISRGIGQFICSQGALSMLNAKLTSFVNPVFLTGQKAYAAFSSFYQSEKDYPCYFYDGSCSHENIEYLANSLPIDCDCIVAIGGGKLIDTAKSVANRLNVEYITVPTLLSTCAAYTPLSIIYQSDGRIKQGEHYERAAYLCLADLDLLVHSPKSYLLDGIGDTLAKWYEANAAVANLTDDVPVFVQAALQMAKLIQQVLLNETDAAIASLTSHQVTPAFKHIVETIIGLGGMVGGLAGRKARVAGAHAIHDGMSQFPQTHQYGHGIKVAYGILVQLAAEKKMTEIEELLPFFTKYQFIHRLQDFGIHENLTEVMQQIAEIACGDGQTFRLAVPNCTVAQVVEAMQYVENL
1514	COG2610	H+/gluconate symporter or related permease	Prediction	MPLLITAIAVVILILLISIWKMNTFIALIIVSAGAALAFGIPVEKVAATIESGIGGTLGHIALIFGLGAMLGRLVADAGGAQRIALTLINKFGEQKIQWAIFIASFIVGIAMFFEVGLVLLIPIVFSVAREMRVNPLYLGISMLSALLATHCFLPPHPGPTVIAGEYGADLGSVLTYGCIIAIPIVIICGPLFTKISQKIIPSAFEKVGDITALGTQKTFKDNEMPGFGVSLLTSMLPVILMMIATFASGIFSKGSFISNTISFIGNPSIAMLISILLAMYTMGIARNISIKDIMGSCYASISAIGMMLLIIGGGGAFKQVLIVGGVGNYIGELFVGTSLSPILLAWGVAAILRIALGSATVAALSTAGLVVPILSNYDVNLALVTLATGAGSSIASHV…
365	COG3230	Heme oxygenase	Inorganic ion transport	MTQQQKTFSERLKAANRITHDSVDNLVMSVEPFKNNENYAKFLQLQSVFHKVVDGIYKDPALNKKIPELEYMARYDAVVKDLEVLNSQPYEFKGNLPTPQGNAAVGWLYCAEGSNLGAAFLYKAAEKKLNFDAEHGASHLAGHPEGRGKHWREFKVYLDNLGLDPKAEDEAIQGAKDAFAFYKVVLREVFGLPEGYESPNQGFVHP
1053	COG0672	High-affinity Fe2+/Pb2+ permease	Inorganic ion transport	MKMTIWVKPFLKPFKLSLLLGLCFSTSAYAKVELGALFVHLSDALSAVKKENSEQAKNDLRTLQQEFNAIPTHNSEAGKETSKALETAIANPTLANVEQISKDLYAFEQEQNPVDHDKNRQKFAEQVLPTLQDLEQVFASKNIEQIRTKFHRFGATWGANELSMRGASLSHYGKMETAMSLFRSAMQANPANYEQMEQQLAILKNTVDDFIGNSKAAQ
2111	COG0561	Hydroxymethylpyrimidine pyrophosphatase and other HAD family phosphatases	Prediction	MKIFVFDIDGTISKNGLKVSDEICDAMAHLLVKHRVIFASARPIRDMLPMLNRKITEHSNTILVGCNGGMAYQQGNFILTKFLEKPYVENCLLRLKALNLPYVLDGKWAFSLSEKEHNFHHYISSLSHARLDEVDLLHDGVSKILVLLDKANQEIYTQFNHDNISFHIHKKENFFDITPHGNNKYNTLKQLIGKQKYVAFGNDFNDFLMLKNAKTSVYLGDKQEIETDYYLDDVDLVGEFLYQHFL
1051	COG2822	Iron uptake system EfeUOB, periplasmic (or lipoprotein) component EfeO/EfeM	Inorganic ion transport	MRLKFIAALISSLLLSTPAMAADLSKETKDYKDFVVAQIDELVTHTESFVDALKAGDVEKAKAIYPQARMYYERSEPIAESFGDLDPRIDARLADLEEEGKGEKDWSGFHKIEKVLWEQNTTKGTEETADQLLKDVKELRAKIPTAEVTPELMITGAVDLLNEVSTSKVTGEEDIFSKTDLYDFKANIEGAEKIYELFKPELLKKDAKLSAKIEQHFKEVNDLLQTYNRSTSGYDYVPYNTLTEKDTKALAEAVNKLGEPLAQLGVLLEK
1520	COG0119	Isopropylmalate/homocitrate/citramalate synthases	Amino acid metabolism/transport	MSTEKLYISDVTLRDGSHAVRHQYSIEQVQQIAKALDEAKVDSIEIAHGDGLQGSSFNYGFAAHTDLEWIEAAADVLTHSRITTLLLPGIGTVHDLKNAYQAGARVVRVATHCTEADVSKQHLEYARELGMDPVGFLMMSHMTTPEKLAQQAKLMENYGASCVYVVDSGGAMHMDDIRQRVRAFRDVLNPETQIGIHTHNNMGLGVANAVVAVEEGCQRVDASLTGMGAGAGNAPLEIFIAVAERMGWNHGCDLYRLMDAADDLVRPLQDRPVRVDRETLALGYAGVYSSFLRHAERAAKQYGLKTMDILIELGKRHMVGGQEDMIVDVALDLLKNR
1204	COG2220	L-ascorbate metabolism protein UlaG, beta-lactamase superfamily	Carbohydrate metabolism/transport	MRKLFQCVKKMSALFASLLLGAVACSNLYPAFGGSPDEQSRAKINKSPNFDGKTFVNLEPTPTGFQKAANGEETSWLKRIFEIAFPPDGKQPSEPLPSLKLDTTQIENGSFTWLGHSTVLFKLNDKILITDPVFHRASPIFFGGKPFTMTYTPSVADLPAIDAVIISHDHYDHLDYQAIQEINPKTTHFYVPLGVKGHLQRWGVPDEKITELDWYEHAQLDQLHITLTPSRHFSGRGLTNRNTTLWGSWVIKSPLLTVFFNGDGGYGQHYKLLGEKYGPFDIALIENGAYDDHWPLIHMTPEQSVQATVDLKAKVVLPIHWAKFDLANHNWRDPIQRFLTAAEKQDFQTVTPKIGQTFTLNKLPQEDWWSVVK
577	COG0252	L-asparaginase/archaeal Glu-tRNAGln amidotransferase subunit D	Translation	MRNKRLLIIHTGGTISMSEDENGKVSPTPHNPLLHNLERLNHPAQLSQENLFNLPSPHINLSHWLKIKARVEQAINLEKFDGVVITHGTDTLEETAYFLDLSLTLHVDTPVTITGALRSSNELGSDGLLNLQNAIVVALSEQSRGRGVLVAMNDEIHHAKFVTKTHTTNVATFQTPTLGPCGLITKSGVLYFQHLTEYERYPVEHITKSNIQLIKAYAGMDSFLLEQLAQYGCDGVVIEALGAGNLPPSCLAGIEALQCANIPIVLVSRAFNGITQNLYDYPGGGKQLKQQGIIFTSGLNGQKARIKLLVLLNQKQPFSTLLDYFNR
264	COG3765	LPS O-antigen chain length determinant protein, WzzB/FepE family	Cell wall	MSNDLSINRKDDEIDLVELFRSLWDKKLWIILSTLIFTLIAGIYAFTAKEQWTSKAEIIPPKVLDLGDYFIIRREYARILGAEFDSGALGNALYSNFNQFIYSVDERLNFLKDSELFKTLSANKTKEQQVEILSTLATENISITKPDAKKNPDAIGNQINLSAETPELAQKTLFQLINTINQKVLQLELDSFNVWFNEKITDLNFEKEKIEWDLITNENVHLEHLNKAYETAGKAGIKEYSQFGNDTFAGAQNVVVSDAKVPYQFMLGEKYLKAQIDVENEKGIIYPARYYEIQKQLGQLQPLAEKLKTAKAQSFHYLSSP-YPVIKDKPKRVLILLIGVLLGGILSCLVVLVRKAFGK
1623	COG1388	LysM repeat	Cell wall	MKKSLFVLPLVAFALVGCTNSSTTDATSSYEVVDVSEPYANVQPTEMPNTMEQPDGQYQQPTYSQPAYNQTTYSQPAYNQTTYSQPTYNQQTSSSYNTSGNAEQVGNCTVVRDGTNTPVYSQIQKGCYTGSTYTVGKYDTLYLISYLSGKSINEIADLNGISSMAKLSVGSTLRLR
1409	COG2942	Mannose or cellobiose epimerase, N-acyl-D-glucosamine 2-epimerase family	Carbohydrate metabolism/transport	MKWINTRTHNHWLENETDRIFEFGYKSVVPTGFGWIGNNGNIRKEMGTQLWITARMLHVYSLATLMGRPGAYKLVEHGINSLLNGALHDPIYGGWYANVDDTGVIDRTKQGYQHFFVLLGAASATATGHPKAKKLLDKAIDIIEKYFWSEKEQMCLESWDETFSQTEDYRGGNANMHAVEAFLIVYDITKDKKWLDRALRITSVIIHDVARNNHYRVNEHFDSHWQPLPDYNKENPASHFRAYGGTPGHWVEWGRLICHLRATLISIGEHAPEWLLEDAKNLFAAGIRDAWSVDGAEGFVYTVDWNGKPVVRERIRWVIVEAIGTAYALYTTTGESQYEEYYQRFWDYSRCYLMDYETGSWWQELDANNKVSNKVWDGKQDIYHLMHCLLIPRLPLTPG…
2084	COG2244	Membrane protein involved in the export of O-antigen and teichoic acid	Cell wall	MSTITKPTLTSTTLWTSTAVAIKLIIGLVVIKIFALNFGSAGLGQAANYMTLLTVLGVLSGAGILNAVTKFVAEYEQDLQRLQAFLGVSSLWIMSVSAMLALIGLLFAQPISLFLFQTADYSLTIQLLALLQCLMALGNYFIAILKGQRQAKACAMGSIFSNLVGSICLLLCLWFAGYQGALIGFACIPALIVVPSLIALFKQHWHWQWLKPKLDFSISALLSRYMLMTLVTACTMPVVSILLRNQLIDSQGLSAVGLWQGLSRISDAYLQLLTTAFSVYLLPTFAKLSDKSAIQNEVKKALGFIFPLALALALLVFFSRDYLIILLFSPDFTPMSDLFGWQLVGDLFKVASYVFGYLWLAKAATGRYICAEMVQGMLLFGLSSYGIAQQGVAGATLGY…
2134	COG1473	Metal-dependent amidase/aminoacylase/carboxypeptidase	Prediction	MKIFESVDNQYSELTQYLIQFRRERHQYPELSNQEVETTKALRAVLEQHQITILDLPLKTGLVAEIQGEPTGKIVVLRSDIDALPILEESGVDYSSKKDGVMHACGHDFHQTAALGAAILLKQRQADLKGTVRILFQAAEETGLGALDVINTGVLNDANVIFGIHNDPTLPVGVLGTKPNALTAGVDRFEIKINAKGAHAARPHDGNDPIIILAQLINAVQSIMSRNVASNENAVVSITQVHSGNTWNVIPDNAYLEGTVRSFNQAVREQIEQRFRTIIDGIKLAFDADIQLYWHAGPPSVMNSPEWIDFTLDVARRNGFEAKLVDASPIGEDFAFYQQKIAGVFIMIGSGGPYALHHPKFRVDDTALFPTANYLATLATEYLALHS
1669	COG2337	mRNA-degrading endonuclease, toxin component of the MazEF toxin-antitoxin module	Defense	MVTSPYVPDVGDIVWLDFDPQTGHEQAGNRPAIVLSPSSYNAKTGLMVCCPITSKIKGHPFEVAISGNIPNVALSDQVKSLDWRIRQAKFKAKAQASEMTEIRQKIAALLGIPILF
631	COG4388	Mu-like prophage I protein	Prophages/Transposon	MQLIEIFKAGKRQSANGQVFHISRDDLQKVVDNYNAEFHEAPMVVGHPKMDAPAYGWIERLELDGDVLKAQPKDVDAEFAELVRCGKFKKISAAFYLPNANSNPKPDGYYLRHVGFLGAMPPAVKGLKDPIFNDSEKDVVEFSEFSDWANAGLWARLRDFFIEKFGLEETDKVLPAWQVQDLHEQAIRDEMKTENQPEFAPHFSEETEPNTAEPTDNHTTDLITSDTQPQGETMSLEDQQKLAELEAENAKLRATQAEMAKAATEKDNAEFAESLLNAGKLIPRQKEAALALLNTDFDSVEFAESDFKQHLKAFLSELPKAVEFAEQATKENAATAPDETVEYAEGTSPESIQADQAIRTYMKEHNVGYAVAFNAIYQ
2012	COG0845	Multidrug efflux pump subunit AcrA (membrane-fusion protein)	Defense	MKKKTAICSLLVISLTVIIILGLNQFKQIKRADTLANRPPSTNPVKTLVLTQQDWQPFVQTTGLISSDSTGLAIQASGVVANIAVTSGQSVKKGDLILSLDNTVEEANLNALQAQYNYYKRTYDRYVQLAKTASVSKTDLDKAEYEYKNIANALASEKANINRRKIFAPFDGKLGIINAVEGQFVSLGQQIVNIEDLGDKKIKFFLPQENIAQLHYQQALHIELENPTENRLTLQQLIEQPSSSQHSHNIESCQAYVSNIDNGLDTQTGLIAVEGVIKCDKQPSPFTDGMFAKVKIALPTIPNQFVLPQVAVAYALSGETLYILQDIEQDDRYKTQLSDAFKAKRVAVTTLDRQGNLALVVPNHQDALKAGDKVIVSGMQRLSDGSYVREEALTDVIIG…
1250	COG2211	Na+/melibiose symporter or related transporter	Carbohydrate metabolism/transport	MSKNKPTRKEIFAFAVGDGGCNLVWTTIGSFLTLYYTDSVGIAAATIGTIMLLSRLLDGLSDLVMGGIIDRTHTRWGKARPWILWSAVPMGLGLVLMFSIPDSLSNNGKIAYASISYILMSAVIYTACNLSYNTLLSVSAPDPKDRVTMSSMRFFFTMCTVLFINYSCIHFVEKFGWIGMSVIFGGLAIILLLITFFGTKERTHTEVNTTNTTTSSQHQNATVSFKLLFTNKYFILLAIIFVINYTILGVNNGLRIYYAKDVLGNITLMGTLTLCFILPKLIGNLVYPYINNWLGKWKSMMLGYVLELAGLLIIALSDTSFASAVIGLVLLGIGGIPHTAGLFAMVADVIDYGEWKTGVRLDGLTNSVTSFGMKVGAGIGSALVGWGLAWVAYDGTLAA…
1719	COG0591	Na+/proline symporter	Amino acid metabolism/transport	MSSSIWIIIGIGIYAIFIIAHGFGSFKSTSKDSESFFMAGRGVNPFVLLCTTAISVFSALAFYGVPASIYRDGIGFFSNTGGMIAGLMFASIGYRLWLLGKEYGFTTPVDFLRTRYYSESYGVLIAIVLILFIVPYVAMQLVAIGDATEITTKGMVPYIVAVALGTLVVSLHIIGGGMKSVAWMDTFHFILGTGTLIVLCVYLVTTYFPNGGLAEAVQKINSNPELSPILSHPGPREIYNWKGTLNNALAGAVATVVWPHIFMRTFIASSKDNFKMMAWAMPLAYVVVYGFIVVLGALIIPAILSSQDITQYGMDNVVSVISTQYASPFISFISLLCLFAFGVSTADSMLLSASAIGSRDLYVRHKYELRNLAIEPRKVVTFGRILLLVLMVLVLIVVA…
28	COG2375	NADPH-dependent ferric siderophore reductase, contains FAD-binding and SIP domains	Inorganic ion transport	MQPTSRTPIADYDQKLDIIEHVNLGHTKALLAIAHVYINEQVENAQLVDLFEEGIILQCQIGDLIESHFVAFLTQDSLHHNVHNLAMHAMKKLGKLISQFWHFQLLKKQQVSRNMCRLFLKSDSPLADQSPAGYAWRFILERFSNKPDSQHINTHLGRYYTLRNTEKSSPNLDYADIAVVDIFQHNDTAGSLWTQDLTVGEFVVANNEFYEQTDHLTTGRALLIADETSLPTVAKLLENWQNPIPPTVISITQDPADQTYLNENLFPAGSQLFRFEYSESADQILTFLQQHPEIEKVWGALENQQAKTIRHYLRNERQFKAENNRVKAYWIKNKP
2035	COG3057	Negative regulator of replication initiation	Replication/Repair	MKIIEVDEELYQYIASHTQSIGESASDILRRLLHLPSLNIRSVALDLSDKTENIDRSLSLQQETASIYSESTVNQQTIQPQEEIVTQQVQVVERAEPDTELDVSKQSDAADLMILLDTPEFKQESKAVVRFLTILSGLYKLNNDAFTQAIRSENVQGRTRVYFAQDEQTLLDAGNHTKPKQIPDCPHWVITNNNSGRKMIMLEGVMREMGFDEKTIDYVKNAFVADN
1371	COG3201	Nicotinamide riboside transporter PnuC	Coenzyme metabolism	MSNFKHYFDDWSLKEKAWLAFVLIFQTIAWVFDNETTFMLIMTLTSSLNLVLGAKGKIEGLYFAIIWSVMYSIQCFTIPLYGEIMYNILYSIPISIASIILWKKNMTSEGEVKFRTMTKAGIIQMILITVIAVWGYAEFLEYLGGGFAFMDSLTTVVAVIASFLYMKRYSEQWLMWVVVNVLAVVMWIMIFISGDSSAFLIIIMNVINMINSVYGYFNWRKISVKIHTETP
1158	COG2223	Nitrate/nitrite transporter NarK	Inorganic ion transport	MSNHHFTVLSIKQVLLAIVGIYTTQTIITSLTTQALPTLWRDAGVSLQFIGLTALLWIPWGLRFLWSPLMERWRLPENQLIRRSRGLILTGQWLIVSLFLLISLLVWWGILELSQSAVVFLTILLFTALVAATTDIASDGFTVEQLAEQQRGWGNTAQVGSSYLGAMLGSGGFVLICVHWDLATAFLLLALIILLLSVPMFLLREPPRSSTAILTHRPSLKYAWSRATIRISLVLMLLSSVGIRLTLGMFGPFLIDKGASLSDVGWLFGSLNITVGFMGAILGGILVQTKPSWQAVIIALAIELVVLFALTLLADSVSLSILMFLISLMFAVFSVLWVALYSVLMSVASPLQSGVDFTLFQSADALLAVLAGLLAGGLAQYLGYTACFGLAAVSVVVAI…
1209	COG2223	Nitrate/nitrite transporter NarK	Inorganic ion transport	MQKSPDNVQFMHFYLTKAQSIMRTIAIMLFMEGTMNTPNSEIEIIPRFILLATAVSYIALGMLLGFTQGGLAPILRSLGVSLAELRWVYVIYLPFGLAFLWSPMIDAWRLPWLGRRSGWIVSSQLLATVAMLMVSFLSPSTGNWVMLMLLGLVATFAAATADVALDALNVDLLPEKNRAMAAGLKMGGLALGTLIGGGALVAFYPQIGWHGTFGVIAACTACSCLPILALVSKERRLFPQSLPQGVQFLHLWRDTVLRQRLLRLSLLVCTLLALFNFNRLLLVDMGVSLERIGTLLGTTGPFANALAALIATLLLHRLSIKQTAWLSIAVCLVGSVIVWLGVFYANSNTVIIGSITVTATAAGLYVVLGSLILAWAKGTQAATDYALLYGVGRFIGTFA…
1584	COG0778	Nitroreductase	Energy production	MQHSSALTTALYHRSIRKFKDQAIPDELFNRLIEAGKMASTSSFLQSVSIIRVTDLHKRQQIREICGSAGGKGQMYVQESPEFLVFCVDTHRHQQLVPEAQTDWTEILLIGAVDVGIMAQNILLSAESEGLGGVYIGSLRNDIAQVTDILALPTGVIPLVGLCLGYPDQEPLQRPRLPTSLILSENAYQVATQTDLAIYNEQVKAYYLERNGKVFNWTEQVRNTLAKPVRPDILAFLHKQGFAKR
1254	COG1972	Nucleoside permease NupC	Nucleotide metabolism/transport	MVGMRIAVGVATVVMVFVVMIAINEFVAYMNFSPYLKEGLGNLDPKTIVIIALGLCGFANFGSIGVIVGAFGAIVPERTSEIAKLGFRALLAATLSNLMSATIARLFIGLAQNLNVKKVQYKISAKFCTALLGCCYESPFNRR
489	COG0451	Nucleoside-diphosphate-sugar epimerase	Cell wall	MIVGQGMMAKAFSGYAEDPKHIIFASGVSNSQEKNRTLFGRESQLLEQTILHHPDQKLVYFSTCSLYDPSLQNSPYVQHKQNMEQQVQRLAQQYLIVRLPQVVGNATSPTIVNFLYQAIIHQQSFTLWQESYRNLIDIDDVVTILNEILANPLFTNQIINVATNKMINVQHIVMILENITKNTALYQSIAKGSYYSIDIAPIRPILTKLSLNFAQDYVQKTIEKYYAQK
574	COG2873	O-acetylhomoserine/O-acetylserine sulfhydrylase, pyridoxal phosphate-dependent	Amino acid metabolism/transport	MSELHFETLQLHAGQEVDSSSKSRAVPIYQTTSYVFDDAQEAEDLFALRKLGNIYTRITNPTVAVFENRIAALEKGVGALATASGMAAITYAILALAHAGDHVVAASTIYGGTFNLLKETLPRYGITTTFVNVEDLTEVENAIQENTKLVLIETLGNPLINIPDLEKVADIAHRHRIPLVCDNTFATPYLINVFSHGVDIAIHSATKFIGGHGTTIGGVIVDSGKFDWVASGKFPQFVDEDPSYHNISYTRDIGAAAFIVAVRVQLLRDTGAALSPFNAFLLLQGLETLSLRVERHIENTQKIVDFLSHHPKVEKVNYPSLPNSPYYALAQKYLPKGTGSIFTFHVKGGAKEARQVIDKLEIFSNLANVADAKSLVVHPATTTHGQLTESELLACGVTP…
1468	COG3307	O-antigen ligase	Cell wall	MLNPVRKYGGKIGKMTILTFIKQNKMLALTNSAVGLYFLITLLFKGSHNIGFALLVATGIIFAIYHVVKKQSVDFIPQDKWITISFVFYVLVFLLSLLVNGGKMSELDNPSRALLVLPLILLFIKYPPKLTILLVCIPVGAVIAGIVALIHRFVLHYIRAFEHQMQIQAGDIAMSLGMFSFAIALYFVYKKQTKLTALCFIASLCGILASLLSTARGGWVGVPFILGMIFWVYRKQLSKKVVGIVSTVLVVLIAVAVMIPQTRITQRLQQMERDISVYVDKNNAGTSLGARFEMWKSAVLMAKEKPLLGWGAEGSNQQRKEQAKQKLVHPVVGNFTHAHNQYLDDLSKRGILGLFALFGVLFVPLGYFWKNMASQHATIKLTALLGSIHIISVMFYCLS…
413	COG4206	Outer membrane cobalamin receptor protein	Coenzyme metabolism	MKLKKISGAIMLTLGAISPASAEEKTEILDEIVVTEVSNNPFKSVSQSELKNGSTSLGNALSKQMGIQANHFGSGASTPVIRGQESYRNKIVQNGSDVVDMSNMSPDHAIMVAPTLAKEINVIQGVDTLLYGSGITGAVVNVEDDKIPTQLPSRTVEGSLDTRYNTNNQEQLYNLATNLRLNNHLVLHLEGLTRHAKNYKSAGYTEQYSVENPCNNSNTSECIEAIFSDDYQENFVESKHYRYINNSEAKSKQGAVGLSWIGEKGYLGIAYTDRRDRYGLTGHEHKAHFCHIHTHQENDEYLEGINLHCEHTSINIDEDFHNHDPSQPEQYAKLKLHLKRVDLRGAIIQPIAGIEQIRFIANDSRYRHDEIEGQYTMSSFQHNGKSVRIELDHKPTQHI…
221	COG3203	Outer membrane protein (porin)	Cell wall	MKKTLVALAVAATAATAVSTANAATIYEQDGTKIELSGSLRLYLGRFADDQRGDLRDDGSRVIFKASHDLGNGLSGFAGYELRFDGGDDTTTNTFGNPDTRHLYAGFKHQDIGALSFGRQLLNIDDVLDDGAYANSAALYPVSTRDYKVVKFRSVEWNGLSFGLDYIFGDSNKNRSTTGNIFDQDGNHLTDLKNGYSASLFYNYDISDNQSLKLAATYLQRDYDDVRTTSTTAKERFWLAHAAYSYGPFYIAANYGQENNKSDYTGKVKTRYSLVDLSYQVIDPSRVYAQWERYETKTDKLQNQYLVGVDYKLHKNVITYVEYAHKRTKDWDDNGLVEPTTKKDNVYGVGLRVFF
557	COG1538	Outer membrane protein TolC	Cell wall	MQILHRTFKLSMIAGFVAILTACNATVDAEQASSVNTPVQFDQVKAGQSQMEIKQWWQNWNDPELSRLIEKGLSRNLDIALAQARLNEARANYDYAEADKGINVSGNASTGGGVNRMKIGNSSADTSASGNIYGGVSASWELDFFGKKKSDADAARSLTLAQQEQFYAAQMLVASEIANNYFQIYALDRQANLINQAIKELQSLENYVKGRFNTGGATAYEVTEISTQITAQQARLTTLKAQADQAQRNIAVLTGETPQGFRIVKSGNPLARIPAVPNGVMPSDVISNRPDLRTAQHNVDAYAAKLASAKADLYPRFNISFMGDGGYVKLDNDLSKVSGILGMVSAGVQLPIFTNGRLEANIDAADARLKSAVIQYDQTLLTALKEVDNAYQMSAALKN…
1089	COG4771	Outer membrane receptor for ferrienterochelin and colicins	Inorganic ion transport	MKKSLLASAIVLALANQYAVANTAKSNENLQEIKVVEQEASDLTTTITPNQITRTNPADIKQMLENTIDVNVNELQRTRGGNDGVNIRGLQGNRVATSVDGIPLPESQENKLFTTIAGAFGRGDFVEPSLLRSARVDRSGSASGLSGAIDFQTLEPQDLLKNRAFGGLFSTGYQSVDTSLVGTMGVALQHGDYQGLVVGTQRKGHETKTNGDNSGTGSTRTEANPADYKNGAVLVKNYYQINEQNRIGLAVEYVHRRTETDNLSDISTSVTPFVTTSTDSSHSNDQVTRTRLALTHNYTGNDIKLDSKLYFQQSDTENYRVRHQTRTVSGNSTVTERIDNMDNKEKLYGLSTQATQFINSSIPQVLRYGLSASYHDLTNDIDTTSDTSLSQSSADTKQF…
685	COG0760	Parvulin-like peptidyl-prolyl isomerase	Post-translation	MFMEKMHNASNSGVAKAILAVIAISFVITGMYGYLGASVDTSAVKVNGEEVSQHQFQQQYNDEYQRISNQLGAEFAAVADTPEFSQGLRSTVLNRLIDQQLLTQYVNDLNLTVSDERIKQEIVRTPMFQIDGKFSQDAYQQVLRNNGMNADMYAQYLREALRLEQLQSGLVETEFLMPKTQNEFAQLFFQQRQVRLARLPLADELDKQAVTEQEIADHYNANKSAFIVPELVKVQYIDLTKAVAEKNVTVTDTAIQQYYQDNKDQFSTKAQHHLAYIQLPNEKEALDVYEALRNGADFAELAKTKSSDKLSAEKGGDLGWLNNGDLPKDFEDVATLVEVGQYSTPIKVGDNYYIVKVNDRKEAVVLPLEQVKDKVIAQVRQELLNTQFYTMEKKVAEKA…
1642	COG1472	Periplasmic beta-glucosidase and related glycosidases	Carbohydrate metabolism/transport	MKTIFKLLPVATLVLAACVSQSVQQPELGAKNLPILELNGLRFKDFNRNGKLEPFEDWRNSPEQRAKDLTTRLSIEQKVGLMFHSTLPNKKDSTTEYDLVELKNLVQTKHVNHLITRLATTPANFAEQNNLAQQVAEQTEFAIPLSVSSDPRHHFLRVAGTPVNEGFSKWPETLGFAALNDPQLTQQFGQIAGKEYRAVGIQVALSPQADLATEPRWSRVTSTFGSNPDVVSQQVGAYIEGFQQGNQGVNPQSVATIVKHWVGYGAEPNGYDGHNYYGRNAQHTADSFALHVKAFDGAFIASTAGVMPTYPILNGATVNGQPLEKVGAGYSKQLLTDLLRNEKGFKGIILSDWGITRDCTSQCTNPTKANPQTLKQVAMPWGVENLTVQQRYVKALNAG…
1052	COG2837	Periplasmic deferrochelatase/peroxidase EfeB	Inorganic ion transport	MSHTNNARRDFLKSSVIIGAGLTMGLAAGTAYSLEPRTKITIENIYPFFNPHQQGITSPAQHHIYFIVLDLHSQDVDEIHQMFKTWTEYSRQLTQGKNVQTYSQNGYVPAVDTGEADSLNPYNLTLTFGVSPSFFTKLGIEKAKPAELVDLPHFPRDQLKAEFTGGDICIQACADDPQVAFHAVRNLVRVARSEITMRWSQSGFNSFEGTDTPRNLFGFRDGTGNPQGEELDKTVWYEGNNWLKGGSFLVVRKIQMFLETWDRTNLNEQQHTFGRHRDSGAAYGQKKEFDPVDLDKKDANGQPVVPEDSHMHLAHKTGLKMLRRSFSYSSGIDSRTGQFDAGLLFISYQKDPQQFITIQNKLGNIDKMNEYITHIGSGLFACFAGVKDENDYLGKALFE…
199	COG0810	Periplasmic protein TonB, links inner and outer membranes	Cell wall	MKKDSLLGFLGSLVFHGGLVGGLLSLAINQDTANGQLGVLDTNISMQMMMATTIEESEPEPEPEPEIEPAKEPEPEKIEIVADPTIKPEPEKPKEPEKPKEPEKKKEKPKEKPKEKRQEPVNKVIAKPNPNAVKADRVMEGNGLVNSQATAISNNATTNNPNLAGTGSNTSEISAYQSALRREIERHKKYSQRAKMMRKQGVVVIAFNLGADGSISGARVARSSGSEDLDNSALQAVQSARSIGPRPAGMGSSVSVPVQFKIQ
1031	COG0697	Permease of the drug/metabolite transporter (DMT) superfamily	Prediction	MRYPFSNIKQSLPLLPFLLLPPLFWAGNFAVGRAVRADIPPYTLSFGRWIIALLVLLPFVSATMKRDWQQYRQHWGRIITVSIFGVAAFNTLVYKGLHSTTTTNAILLNSCIPVLIMLIGVLFYHQKIKLIQAIGLSISLFGVLVIVLQGQWANFVALSFNPGDIIVFMAMICWAIYTLLMKDIPANIDRKGLMGVQIIIALISLFPLFLWEQLQGSQTIIWNSSTLLGLAYVGVFPSVIAYILYNVAIQKVGPVISGLSIHLMPVFGVLLSVSLLGESFHLYHLCGIGLIGLGLVLSQK
662	COG2932	Phage repressor protein C, contains Cro/C1-type HTH and peptisase s24 domains	Prophages/Transposon	MIQDWYELKDLLGIAGLPATVQGITKKAKLENWERKRKENVKGRVYEYHYTSFPPSVQQALGFTPDIIQSPTYSGKALNLQTDDEDYCDIVDFREIDVSAGFGCENEEIYQQDWVKVERAWLIRNRLNPNNCVMFKVHGDSMEPTLSDNEEIIVDRSKQTLTEGKIFVLNHMGTMWVKRVKINFDSIELISDNDFYSPIVLTEDDANQLNIIGQVVRGYRDF
2183	COG5412	Phage-related protein	Prophages/Transposon	MLLDELLIKIGFDVDSAQLNQVGQMLNNVGETAKKAFDNLRSEKIDVDFHSLNQVEQTLNNIGDSVKQTFDGIDLGDVNIDTLTEQVEQAFDDVSDHIKTGMVSISDFIDTTTAKELFGDQFETATTELDEFVQQLLQLSNIDEINTDEIQAFVDKVAEFDEFIAQFGEDTQAYFAELSDGFHQASETYQQGLAKVAQQENQFSNATEQANDALKHQEEQANNTHDALAKTGNVFHDLLGSVSAFIGAKFGIQIDSEPFKKLGKAIKDSQEKAKSFLGSVKGIPVALGLVGTAVGAVVKGLSAFVDNTLTSLDSLAQLSRVSGVSAGYIQSLGEAAKRSGSSMEAAQSSIAGLQRTLGEALNGVGRGAKTFEQFGIAAKDASGKAKTMPEVMEEIQGKI…
695	COG3479	Phenolic acid decarboxylase	Secondary structure	MQIKDLDQFLGSHFIYTYANGWEYEFYVKNENTVDYRIHSGMVGGRWVRDQKADIVKLTDGVFKVTWTEPTGTDVALDFMPNEKRLHGVIFFPKWVHEHPEITVRYQNDFIPLMEESREKYETYPKYVVPEFADITFMKNEGINNEKVISEAPYPSLAEDIRTGKKSFS
810	COG1447	Phosphotransferase system cellobiose-specific component IIA	Carbohydrate metabolism/transport	MEQQTMSQEDLQVVAFEIIVHSGDARSLIHQALSLMKQGEFSQAQCQLDEANKNLLEAHKSQTSLLKDYACGTVINMEIIMVHAQDHLMSTMLLHEIALEFLALHQKIAEQV
812	COG1440	Phosphotransferase system cellobiose-specific component IIB	Carbohydrate metabolism/transport	MKKALIICAAGMSSSLMAKKTTDFLKSKEHDISIDAVSATEGQKAIESGAFDLYLISPQTKMYLAKFTELGQKVGKPVESIPPQAYVPIPMGVEKLANLVLEKI
808	COG1455	Phosphotransferase system cellobiose-specific component IIC	Carbohydrate metabolism/transport	MNGIFQLLEKYLMGPMAKIAAFKSVRAIMAAGIASITFTIVGSLFLVFNVLPTTFTFLQDFFNDTFFRISDLYLLVYKASMGILAIYFVIVISYEYTKIHQQEDELNVSPLNGALLAVFAFFLCVPELLFVDGKMQLLAASKTLNGWTIGGNGPDRLGTVGIFTAIIMALLSVKIYCFCVKRNFVIKMPEAVPEGVARSFTALIPAFAVALVVLVINGTFVLLGTDIFKVIAIPFAFVTDIANSWLGLMVILFLIHALWIVGIHGASLIMAFVKPILLINLQANINGEVVPYAGEFNNSFVLLGGSGATLGLTLFIAFLARSQQLRILGKASVAPGIFNINEPIIFGLPIVYNPYLAIPFFFAPMVSASLAYWAIKLEWINPIIAYIPWPSPAGIGAFI…
2231	COG1263	Phosphotransferase system IIC components, glucose/maltose/N-acetylglucosamine-specific	Carbohydrate metabolism/transport	MMNDTEIAKKIVEAIGGFDNVQSFAHCATRLRIMVKDESKIDKDTIEDLDKVKGAFFNSGQYQIILGTGTVNKIYAEVMALNGGSTQTTQTAAPVPPQGHWFKRAIRTFGDVFVPLLPAIVATGLFMGVRGAINNDEILSLFGTTSAAFSASNFYVYTQVLTDTAFIFFPALICWSAFRVFGGNPIIGLVLGLMMVSPALPNAWAVASGGAEPIYFFDFIPVVGYQNSVLPAFFVGLIGAKFEQWFSKRVPDVLALLVVPFTTFLVMSILALLVIGPIFHSVEDYVLAGTKFLLALPYGISGLIIGGVHQVIVVTGVHHIFNLLESQLIAADGQDPFNAIITAAMTAQAGATLAVGFKTKSLKLKALAYPAALSAGLGITEPAIFGVNLRYGKPFIMGL…
811	COG1762	Phosphotransferase system mannitol/fructose-specific IIA domain (Ntr-type)	Carbohydrate metabolism/transport	MFNKKEIAILQYLFDNQDRFVTSEQLGLQLNCSDRTIRHYIKSLNSELPQYGASLLAKQGNGYQLQIENLDQFRPQLQLSRPRRAIENKQDRQKYILQQLCFNQPHILFDRLEQELFVSRSTLSADFKEISDLIKPYQLILRSKANQGVSIQGSEQNYRSFIMDYFFKENFGDAINRYIGNAIFVDEIRFEQLLQIILEECRKGKLYLADFMLQNLALHILLAIKRIKTGHKLNINLDQHELNEHVNESRVAENIIARIKAENHVSMPQSEIDYITLQLLAKGKRHSSQLSEQAQQQAEIKRRIEQIEQALQVQLQDDESLLQAISQHLQLLITRLKNHITLENPLCQEIKQNYQGIFQLVRSNFAEFPAFDGMEVSDDEYSYLTLHILGAIERYQNKK…
432	COG3093	Plasmid maintenance system antidote protein VapI, contains XRE-type HTH domain	Defense	MEMYNPPHPGRILKEYMGDISVTEMAKHLGVPRSELSQILKGKKGISAEMSLRLSKAFSTHDELWLKLQNKYDLWQARHGKNVTYQQVTPVFNASVYS
1187	COG2843	Poly-gamma-glutamate biosynthesis protein CapA/YwtB (capsule formation), metallophosphatase superfamily	Cell wall	MRFIVCGDALFSSRNLAKRLEPKLIKLLKEADGCFVNAEFCTPKYDTPPAAGRGYITSVQAQTLDEFVDLNLLMVGFVNNHTGDYGWQGVVDTIESAVERKLIPCGVGRCLGEARLAKFLDTIDGRVGIVAAGSTRSEVFAASDAGAGVVARPGSNPLRWKRTYVLESPLFDELEKIDRVLGTRISMDDGLKVETYAPQGKDNFKFGSLFEGALDIERGVISGVKTSVHEKDAEEILKSIQDASKRADLTIFSLHTHEGVNENWYSPYVPEFIEDIAHRAIDNGANVVVMHGAHFLRGIEVYKNSPIFYNLGSIFMEFEAGESIITPEMYESYGFSPNSRPSELHTRRAKDIHGNFIGFNAERRFSENCLLQLDFENGQLTWSLLPIDLQLNASRTLDR…
459	COG1989	Prepilin signal peptidase PulO (type II secretory pathway) or related peptidase	Intracellular	MIILGFFLLGGIVVTLVRYYLQNLATQIQQEIYQSYVDLFPDNAPQVCPENSRLMPIKCAGFWLYFLVGAILFGLNAYYFINPMQALFWLTSGVLLFLIAKIDGHYQFISVTHCQCLMALGVLGAYFQFMPISLEQSLQSLLIGFGAFYLIFYLARCYYQQDALGRGDYWLMGALSGFHPWQQLPYLVFVACCAGLLFAGWKAIKREKEVYLPFAPFLVIGQIVVLIIEHFCL
184	COG1651	Protein-disulfide isomerase	Post-translation	MKYLSILFLLLCSSMAWADNNALQKNTAELASTENEKTFQDGRDYFSYTTPINMQLEKGRVQIQSFFDYDCRTCVNVQDILVLYQELNSDRVSYEEYPIATANAHYSAQVFYSLHQMKRDDVSDLLLFETTEVSRYIELAKLENLSVWLQQHQVDEKRFNNIFYANSTIKLVNSAIARTEKYGVFTYPFVVINGKYVLTISTLYNDDYTFAVLDYLVNKVILEQQDK
1140	COG0684	Regulator of RNase E activity RraA	Translation	MTELAINQLGVVKRHIQRADKSAVEKLAKFGVATIHEAMGRIGLMKPYIRPIYPHAKLCGTAVTALLQPGDNWMLHVAAEQIQQGDIVVAGCTADSTDGFFGELLATSFRARGAKGLIIDGGVRDVAELEKMDFPVFSKAIHSKGTIKATLGSVNVPVICAGMVVYPGDVVVADADGVVVVPAAKALEVAEAAKKREDNEAGKRQQFEAGVLGLDLYKMREKLANAGLQYID
1780	COG1943	REP element-mobilizing transposase RayT	Prophages/Transposon	MQYNPNIHHRKTIRLQHYNYAAAGSYFITICCFENQPIFGKIINGEMILNENGKIAQQEWLNTVNKRKGIEIDEFIIMPNHMHGILNFINELSEFNDMIKPRFNSPKNNLGSIIRGYKSSVSSKIGLGYSVWQRNYHEHIIRNEQSYNQIEEYIICNPIFWKKDCFYIER
1659	COG2304	Secreted protein containing bacterial Ig-like domain and vWFA domain	Prediction	MMKKIFYFAKPGYNTLFQFYKNESGVYTVMMGILSFVLLGLIAFAVDGSGLLLDKARFVQGMEQASLALVTENNANRQNPKHYDVTRQPSDSLDPKEKLMEQQDKRNKELVSGIVRSYYLGNTYRPNNQEVKDQYDYYCGTINNDLGANSKTVACYVSGNFDRPSWIYLKDQPLSFAKVNNISSGAIYAQKNLDEVAPLDLMLVSDFSGSMNSDVNNRETYLYNNSKLAILKDVVESIGNDLLDVSKAERENRNISPFNRIGFTAFALGAQQKNNTGYCYLPFSFKGRSSKLPLSNRTNFYELVSYINNNVDLSATINKIASFNGTDISYSVSFSKNDFCLKDNDNHSTTDFWFTKEQHSTLNDKFRSLKANGATLSSSGLLIGANYLMDKNNDPEAQP…
941	COG1404	Serine protease, subtilisin family|Type V secretory pathway, adhesin AidA	Post-translation	MSNYPWKRTLLAIVIGIVMTSKGYAEDIDENDEQQQAPQSGQMVNPHDGIGLTEQISAQYSGDGVKVGVIDSGFMNEHPLFNQQKLHSLTFEITDNDGNKKIFDANHYELETEDENGEQKTVYSMHGGQVAGIIGANSFLQYRGGVAKNADIYLTTTEATETPQDDDTDDSDNSKDNDKSLELLLGNEAEIKDHRNTIATAFAQHTANKVFVINNSWNEDPVDGTARVMDDKYKSGIEKATDNVLINAIKDAVKKDTLIVFAAGNESKQQPGIMAALPRYLPELEKHYLSVIAVDDGENIADYSNRCGVSQNWCVAAPGTLSVLVTEGAEQNIKLPGLQVQQGTSFAAPVVTGSLAVLKQRFQYFTATQVRDTLLTTATDLGAKGVDDVFGWGLINLSK…
663	COG3850	Signal transduction histidine kinase, nitrate/nitrite-specific|Signal transduction histidine kinase	Signal transduction	MKVTINFLSAKIFALFWCIFGLLLLVAYFIPQLDTRLYVDLTSKEINKYHQDIVSAVRTQQFSRLLVTPEPLIEEKLNFTRPVLVDNERNIIGAKKNEIVYIQDFIHHSHDVLRPQSRTFYNLLIAGPFSIHLVDEDKQFAYFVYFITNVDPQRAIVNYTFDHPLFLIMLLMLISTPILAWLAYSLTQPIRRLQRAANAVALGDFRVNKELETIGVVELRQVGKSFNQMAQSLADIINTRQYMMSVVSHELRTPLTRLQLALGLIRRKMGDSKELQRIEMETNRLNQMMNDLLLVSATQVENSLYRKCISLLQIYQNVLNDAIFEAKELHIEMHIKQQIKSPEKCFIYGNLEGLSRALENVIRNALKYTKSMIEVSFLLRNNQVFIMIDDNGQGLPEAE…
816	COG1053	Succinate dehydrogenase/fumarate reductase, flavoprotein subunit	Energy production	MTTAFEQLTLASGLTLKNRVFMAPMTTQSADENGFVNDELVTYYRERAKDVGAIVVECGYVQRNGMAFPGGVGLSTDDHIAGLAKIAEAIKQQGSVPIMQIYHGGRMVRPELLPDGSVAIAPSAIAACRHGCVEPKALTVDEIEQLIVDFGLATERAIKAGFAGVEIHGANTYLIQQFFSPHSNRRDDQWGGDIEKRARFPLAIVDVVKSTVKKCLGDKPFVVGYRFSPEELEKPGINYDDTLFLLEKLAHKGLDYLHFSTGQAVQTSIIDLHDKQPLIDKLIQNRSETLAKIPVMGVGSIKQAKDLDNAFAHGFDLVSVGKALIVEPRWLQKVQDGEEVLNFMHIEDCKARHVPETVWDIIGPSMEKEEKSYLNKQAPRKEFVPGTYVERFADFHGMV…
2230	COG1621	Sucrose-6-phosphate hydrolase SacC, GH32 family	Carbohydrate metabolism/transport	MAFTTEQRYRAYADWSAEYIEKIKKNTALSPWRTHFHIETPHGLLNDPNGFSYFNGKFTLFYQYFPFGAAHGLKSWVHTESKDLVHFKQTGTVIYPDTPLDSHGAYSGSAMQFGDKLFLFYTGNVRDENWVRHPYQIGALMDQKGNIEKLNKILIEQPDDVTDHFRDPQIFNYQGQYYAIVGGQNLNKKGIIKLYKAHNNDYQQWDYVNDLDFANDNTAYMMECPNLVFVDSKPVLIYCPQGLDKSVLDYQNIYPNMFRIGDNLDVEQAKLVNPTPLQQLDYGFECYATQAFNAPDGRALCISWLALPDMEYPTDKYDYQGCLSLVKQLAIQNGKLYQYPVEDIVNLRTSKEIFAERQHTNNIYELALNFAPNIRHEMVLMADKNGNGLTIIVDTTKGE…
1372	COG0524	Sugar or nucleoside kinase, ribokinase family	Carbohydrate metabolism/transport	MKTLILGSAIVDQIMLIDRLPLSGEDITCIETKTTIGGCAYNVASTMRNLDTHHDLYVPVGTGLYANLIRETLLQNGYPILFHSEEKDNGYCLTLVESNGERTFITVVGAEGYLKKDWLENINLDDYSQVYVDGYQFTNHNGKIIAEWLSANNQTQLFFAPGPVINVINAEVMNQLLSLKPILHINEKELKDFTHHNDIKQAVQCLHSQTQNLIIVTLGSKGAAYFDGTIFEIIPSPKVKIVDTIGAGDSHIGAILAGLSQGYPLKDAVILANKIAAEVVQTQGSTMTKENFIQKFGG
310	COG0659	Sulfate permease or related transporter, MFS superfamily	Inorganic ion transport	MKLFNTWKTRQDGEVSPYIPCGPFQIRLPFIHYRFEWPDYLQGLLMCAVDLAAIPLLTQLLGMPFEVALAIVVLNGLFYLAHHLLGDPCVPGWITPAIPLIMVYCQQFPEGPERIHSLIAFQMMLGLFSIFLGTTKLASKIVQVIPSAIKSGIIIGAGFAAIISIFKVGGRFESFPWSISIAVGIGFYLLYSTHFAQLQTKYPFFSVLGKLGIFPIIILAVLIAPLFGEASWPTIKWEFSHPDFKTLWNEYTVFGVGFPPLAMYLSAIPTVLATYIVLFGDILQNKALIADGQKQRADEKVEYKSSRAHLIFGGRNTVMSIIGPDVTMCGPIWSAMQVVMIERWKKGRKAMDSFFGGIGSFRWGTNTGLLLMPIVSLVQPILGVALALTLLIQGYVNMK…
1070	COG2168	Sulfur transfer complex TusBCD TusB component, DsrH family	Post-translation	MLYTFSNAQYSATELQRYFAQLTEQDAVVLWGDGVLLMVKQVALLQHVKKGYVMQEDLIARHLQQHPNLTLLKDHIQPINMTQFVTLTEQYSPQFAL
1407	COG3684	Tagatose-1,6-bisphosphate aldolase	Carbohydrate metabolism/transport	MIKEKIMLSYTIKDIARASGGFAMLAVDQREAMRNMFASAGVKQLIADQVLTDFKVKAAQILSPYASAVLVDNQFCYQQIVAQKAISPVSSMIVAMDKFIPGNGIPVDQVELDKDIDPYEVRANGGKALKLLVLWREDEEADQRLEMVNDFIKSCRSAGLVSIIEPVVRPPRTGDKFDREKAILCAAKELGDCGADLYKGEMPLFGQGEASTLLKATKALNDQINMPWVILSSGVDPNLFCRSVRIAMQAGASGFLAGRAVWSSVIGLPDTELMLKDISAPRLQHLGRIVDEMMATR
1488	COG0457	Tetratricopeptide (TPR) repeat	Prediction	MKQKPFFRSTLTLAFVATFPTLALAAEEPSPEQQQLEINRRFDDQRMRDNSLDQQIQLKQIPQSKQPVQQTESHSLSISKEELAKHPELVIRALIPALSQGKTEIVAMLYPIYQKIDSRWHDPLLTQWQQAILAKKERNYNQSIRIYRQILADRNDILPIRFQLATVLFENKEYDAAEGQFEKLRSENLTPAVAGLIDAYINAIHQQDRWSFGGGFTYLNDPNINNAPKSGTTYGNWTSPKRESAQGVGYNFDASKKWSWGNGFYHQLDLSLYGKYYWNNKKFNEMTMHEGFGLGYQTGRSDLSLIPFLEQTLYAGGRETRESLKRFSKSGGSTLSFSYWLNPKWQWRANYLYSEQRYTERKHLNGNTHYISTGLSYLRNAQQYWYINLSYNRTGTRDI…
514	COG4972	Tfp pilus assembly protein, ATPase PilM	Extracellular	MGKLIKKNTTIQVGIWITKQYFELVWFAQDKMTENTPHFCRVNIDTPNSIQATLVEHMSNHINIQRPLEIKWVTAMLPHKVWSKSIILPHHLNENECDHQCRYILENELPIALDELWFDYMTTPLKQGLRLDIFAVRKAVGQTRLIQFLPLNIKTLDTAVHCLYRAFGYLFKTTPSSNDLFIYQDQQSTILFRQTLQEWQILSSPNQTNLTELYQQFVQRYEQNIDNILLYCETNNIQFHQPYQQVTSDIPLIPLGAALWQKDWQQNENRT
817	COG1477	Thiamine biosynthesis lipoprotein ApbE	Coenzyme metabolism	MVEKSVTTFIAMGTVNTITVFTPIVDEIKVAVYQLVKNLEDKFTVNRPYSEVMSINQAAGLSPVQVSRDVFELIQQATLASLAPNSGFNAVIGSLTRLWKTSFQQHCLPTEQNVAQSLKLINPHDIVLDAKKQTVFLSKAGMQFDLGAIAKGYIADRLVQLLAQYQIYAGIIDLGGNVIAFGEAPHNAQGQWKVGIQQPFAKRGQYVGIVAVKNKSIVTSGNYEKYTEIQGKSYHHIIDPNTGYPFESQLDSVTIISDRSVEGEILSTQVYFKGLEDGLKFIEKIPHFAAIFISKDQKVYVTSNLVSSFKLVSSDYELTNINSVI
2100	COG0526	Thiol-disulfide isomerase or thioredoxin	Post-translation	MGHPSVYPTGVTIYKPEKCWNGYNLVQTIRSGALLFDMNGNEIRRWDEFHGFPNKLLPNGDLIGYSGDRNPRYGMQDGVDLVQIDYDGNIVWKFDKFEFITDKGEEPRYMARSHHDYQREGNPVGYYVPNQLPQTRSGNTLILGHTTLSNEKISPNKLLDDVFYEVDWQGNIVWQWKASDHIDEIGFSEEARQSLFNNPNIRAADGGVGDWLHINCMSYLGENKWYSAGDERFHPENIIFDSREANFIAIISKKTGQIVWQIGPNWQQKEVAHISNIIGPHHAHLIPQGLPGAGNILVFDNGGWGGYGSPNPASPDGTKNTLRDYSRVLEINPITLEIEWQFTPEDIRAAIPTDASKFYSPYVSSAQRLPNGNTLIDEGSNGRLIEVTREKEIVWEWIS…
1729	COG3711	Transcriptional antiterminator|Mannitol/fructose-specific phosphotransferase system, IIA domain	Carbohydrate metabolism/transport	MLLTKRQSFLVQLLEKSHSYITVKELAQKCGCSERTIHYELNNLADYLAENSKVIEKRSGVGVMLTEHVAKNNLTKTSNKTSLHKRRVEIAYQLLFQEKILSYNLLSEKYFVSKTSIKRDLDYINNNIVSLNSNYQGTFIEQQPEALFLAFFRFNEFILSHENKDHVVLLKQYYSSEIVDFCLQELAFFLDKNQNAFAYNDSKNILNHLVIFFFNLNKGIHYTTTQILSKNIRTKTLFSFMKMILSVAKNLSIELENSDVDFLVQYIVFNKSSLIQENENYYHAIIKNLINKMSLIINVDFSKNQFLIERLSSHIPSMLERLKNKIMVKNEFSHELKLNYPEMFNAVIMATEDVFPNIDLNENEVAFITIYFQAALENILTDKRKILLVCSLGNAALAF…
1174	COG4977	Transcriptional regulator GlxA family, contains an amidase domain and an AraC-type DNA-binding HTH domain	Transcription	MISAQITQALLAICPKNSIWQTPIDGLFLHHLDSPQMMNGFRQQPSLCMMLMGERQLCIGNECCRFNQDNMSLCPVNTPVTMTVDHATPNKPYFALSLQFDLVMVARIASQLNLHNPINNSIQPQDFLTLFNPNQELINALERLLTLLYAPNFEQKITILAPLYLQEIYYYLLTSPQGDKLCELCRQGSHAERISKATAWLNQHFSEPLDIAQLASLCGMSISGFYQHFRHITQQSPLQYQKNLRLTEAQHQIQQHSAPISQIAYNVGYESPSQFSREYKRYFGRAPSEEI
890	COG3070	Transcriptional regulator of competence genes, TfoX/Sxy family	Transcription	MSNIPTINLYEKLTSLLGEIRSKKLFSGIGIFYNDHMFGIYKKGGFYLRAKGDLANQVKSIGAIPWELDGVPSNLKIRDYYLIPGNYLTDNDKSLILVKMIKVSLQQIESEKLADTLERAKRIRNLPNMSLKYERLLGKIGIDTISKLREVGAADAYILVKSQGLFVTSHLFWKTYAALKNKYVELLTEKEKEDGLKEVNEKLNIAGFRAMKYKL
1402	COG1593	TRAP-type C4-dicarboxylate transport system, large permease component	Carbohydrate metabolism/transport	MVSPVFILYFLIFLLIGVPVLFALGLSPIIALFQDEKVLFINMLYQRLYSGLDSFLLLALPFFMLAGEFMVNGGITNRIITFSQTMVQHLKGGLGHVVILASTLFGALTGSSVAATSAIGKMLIPEMERYKYDRTYAAALTAAATVLGTIIPPSGIMLIYAFVMNTSVAAMFMGGVVPGIILCIGLMLVNRYQIRKYPQVQQFARASSVERRAGFKMAILPLLTPVIILGGIYGGIFTPTEAAAVAVFYALILSVFIMKNLKLKDVYPMFVRVSVNAAAILIIVAAASGFASAVSLSGIANHVTSFLYSITDNKYLLFFIVNIFLFIVGMFLDAGPAILIFAPILAPIMTNVGIDPVHFGVVMVSNLSIGLATPPMGLVLFVASGVSGVPLQKISKAIL…
1401	COG1638	TRAP-type C4-dicarboxylate transport system, periplasmic component	Carbohydrate metabolism/transport	MKIKKSILISTFLLTIGAAQAAQYKLTVPIVTNLDSYNYQSLLVFKNIAESHSNGEISVEIYPSGQLCGNAKECLAGVQSGMFDYFQTTVPELANYWQSIESFDLPYLLPNDRVAECVYDNQDFIAEVREGILGKTQNLRLMMISNSGGWRNFATTKKVIQKPEDLKGLKLRTVPAAIQQELVKTLGGAPTPIAWPEVYTALSTGMVDGTKNGIVDIVQMKFHESLKHITLDGHAYMGGAWLMNNDKFNSLPDNLKKVILDAVIAQNQYLRSYPKWQEFNAYEEFKKAGGKIYNPTTEEKEAFKKATMPIRDNYLNKANEDGKKWLTKFEQQIHFCETKISKEDQEALK
1403	COG3090	TRAP-type C4-dicarboxylate transport system, small permease component	Carbohydrate metabolism/transport	MILKNIENILAKVNEPIANTGKRIAGLLLIMMTSIVLLQVFYRYLLGSPLTWTDELSSYLMIYMTYLCLPLIYLTDQNIAMTFLVEKIKGKRISHLVMFFVHIFALLTIAVWIYFGWAFFLKGNVMANSLPFKMYYIYLVPPLLFCITLLQVMQKIISELNNFINYQKIN
891	COG3642	tRNA A-37 threonylcarbamoyl transferase component Bud32	Translation	MTLEQYAQSLCSQHPDKRIYPFEFENKRYWLKQPEKPKGSQRLLKTFPHKAFHREVERLLKLKQKNAPIPHIYIANDNMLVMEDAGLSVSHWLSNRNISSEQKQQILNDSAIALAKLHKQKLIHGRPFVKDILWKDGIVSFVDFEVDAVSNNPIQQQIQDNILFMIGLCREQAITKEQIRQTILTYKNYTEQHIWQTTLNKLRYYRWAYWLLLPFKSIAGKDLKALYLLIEICYKDDILVK
1303	COG0286	Type I restriction-modification system, DNA methylase subunit|Prefoldin, chaperonin cofactor	Post-translation	MQRRTTLRADFWLFAVWEKCFAHDHEIIQLISQKSYRKSQNCTMAKNKRKIPYAQSQRTYHCSKKRIIFMNKQQLANKLWASANDLRGKMDASEYKNYILGFLFYKFLSEHQEKHLHKEYQITTKEVDASDIATIQEDLGYFIFGADLYATWVENIKNKNWKISAVTDALSHFRENINDSQRDDFEGIFEDVNLTSEKLGSNPAEKETAIRRLIMLLNEINISDSNREYDTFGFIYEYLIAQFAMASGKKAGEFYTPHEVSRIMAMIVANELRHKEHCTVYDPTAGSGSLLFAVGDETNHAKHHHNIKYYGQENNSTTYNIARMNLLMRGVTPANMVLRNADTLKEDWPNGIISGKNDPLFVDCVVANPPYSAKWDNANGQLKDPRFRDYGLAPATKAD…
1912	COG4795	Type II secretory pathway, component PulJ	Intracellular	MTRFYNGQSLLGLMLSLILSSFLLLVIIQFYSYAQQQNRRQLLQLQLQTELQRALQTMAKDLRRAGFRALSIKVTQENFSLFELDEDGISLAIYPVSNESAVKNNCVLFFYDLDGNGCLGSTAKQCAKDEQNATSEVGRELFGYRQNGLLLESRTYGNKANTKCKKAECQGYLQQNACQDLGWTKMLDEDNYEITDLQLNWLDNSKQYKGLMLYLAGRLKQSPDIQYESSVVIPLLNQPILSE
1569	COG3468	Type V secretory pathway, adhesin AidA	Intracellular	MKIVHFKYSALTLALIANFAVTQSALSYSAEIAKT--CNREFCELKDQHIADKPDLSSISITNVKKAILSNISIAHSSNQSGVIDMNNTNVSIDGLTVNSTNPASLWGLRFENSTVTINHAVVNVATKSSDNTPRGMRGALAFESRLSGGDSTTYVSNSSFTNRADQSAVVVLAKNYAIFDEVTLKATGDKSTLFSLQDD-TKLVAKRVTAENTQHQDGLFIHVDTGGLKGDTVKVPYLQDLQFEDSHIHAKQGIQWMDAEGRMTLHLVNSTLTVDDQLVRINQPNDVQNDITTSISLERATLTGGLKKTNSWVDISLTDSNWNVTSDSTVHKLSTLGGASNISFVNNSEGFKTLTITGEYQGAHNFYVNSNISQDQSDKVVLSGKLSNQENSAIFLVS…
2228	COG2226	Ubiquinone/menaquinone biosynthesis C-methylase UbiE	Coenzyme metabolism	MAKIRWHAKAAKAFKLPSSWQQLPKGEQYCETLGSYFAKFSPLITGKQLVRLGGLSAELECKMSLPYHFVLSPEISNHLTALSSQNSYSLIQGDLIELPFESQSVDVCISANTLNFMQDPHQLLREIQRILTDDGYLFLSIFNPFSGLLFKQKINQPQNPALPFRHFLPCRIIDWLHLLNFEIIQQQTLGNLFAIVAKKQTYPLSLQPQKQRFEPSKIFQGEPVGAFKGVEKHEI
1206	COG1974	SOS-response transcriptional repressor LexA (RecA-mediated autopeptidase)	Signal transduction	MKKQWNTYVREKMQQNKMTQEEIAERLKKTQGAIGHWLTGRRTPNINEVAELIKIVGGDKVILNNDGTVEDFDNNVTPVNIKQTHSYPILSSIQAGTFSETFDYSCSTGYEFLESIIETKGEGFFLEVKGQSMEPKFSEGDMILIDTGLQPNPGDYVAAVNGDGEATFKQYKELGEYSEYGNPHFELVPLNPLFPTLSTKLQHIRIIGVAVQRVEYL---
