# Supplementary material for: Isolation and sequence-based characterization of a koala symbiont: Lonepinella koalarum
Source: PeerJ. 2020 Oct 20;8:e10177. doi: 10.7717/peerj.10177 (PMC7583611; doi:10.7717/peerj.10177)
Supplement: Supplemental Information 11 — Genes coding for putative carbohydrate-active enzymes (CAZy enzymes) that were only found in Lonepinella koalarum relative to 55 closely related genomes are shaded in grey (corresponding to Table 3), and CAZy enzymes that were only found in the assembly of L. koalarum strain UCD-LQP1 alone are presented in bold. The position of genes potentially coding for these enzymes are shown for all three L. koalarum genome assemblies. See Material and methods section in the main manuscript for details on how assemblies were screened for CAZy enzymes. [file peerj-08-10177-s011.xlsx]

## Sheet: Sheet1
CAZy	Full name	Enzyme	LK position	SMGJ_25	SRHX_75	Comments
GH1	Glycoside hydrolase family 1	β-Glycosidase; membrane-bound lytic transglycosylase A (MltA)	1_1622	SMGJ01000003.1_241	SRHX01000005.1_11	Family GH1 β-glycosidases are retaining enzymes, as first shown by NMR and follow a classical Koshland double-displacement mechanism. Enzymes that have been well-studied kinetically include the almond emulsin enzyme, for which a particularly nice and important set of studies on rate-limiting steps and inhibition was reported in the mid 1980’s and the Agrobacterium sp. β-glucosidase which has been…
GH2	Glycoside hydrolase family 2	β-Galactosidase	1_1329	SMGJ01000001.1_345	SRHX01000001.1_345	The most common activities for glycoside hydrolases of this family include β-galactosidases, β-glucuronidases, β-mannosidases, exo-β-glucosaminidases and, in plants, a mannosylglycoprotein endo-β-mannosidase. The enzymes are found across a broad spectrum of life forms, but are concentrated in bacteria. The most famous enzyme in this family is the E. coli (lacZ) β-galactosidase, a component of the…
GH3	Glycoside hydrolase family 3	Glycoside hydrolase Family 3; no approved entry	1_1536	SMGJ01000007.1_125	SRHX01000008.1_18	Glycoside Hydrolase Family 3 currently groups together exo-acting β-D-glucosidases, α-L-arabinofuranosidases, β-D-xylopyranosidases, N-acetyl-β-D-glucosaminidases (glycoside hydrolases), and N-acetyl-β-D-glucosaminide phosphorylases. Widely distributed in bacteria, fungi and plants, GH3 enzymes carry out a range of functions including cellulosic biomass degradation, plant and bacterial cell wall …
GH4	Glycoside hydrolase family 4	α- and β-Glycosidases	1_1355	SMGJ01000001.1_371	SRHX01000001.1_371	The majority of the glycoside hydrolases of this family are of bacterial origin, but they have recently been found in the archaeal taxa. Unlike other families of glycosidases, some of the enzymes in Family 4 possess distinct substrate specificities from each other. This family contains α-glucosidases, α-galactosidases, α-glucuronidases, 6-phospho-α-glucosidases, and 6-phospho-β-glucosidases. Simi…
GH13	Glycoside hydrolase family 13	Major glycoside hydrolase family acting on substrates containing α-glucoside linkages	1_1263	SMGJ01000001.1_294	SRHX01000001.1_294	Family GH13 is the major glycoside hydrolase family acting on substrates containing α-glucoside linkages. A number of reviews are concerned with α-amylases. GH13 contains hydrolases, transglycosidases and isomerases; noticeably animal amino acid transporters, which have no glycosidase activity, are also GH13 members. The enzymes are found in a very wide range of organisms from all kingdoms. While…
GH20	Glycoside hydrolase family 20	Retaining glycoside hydrolases	1_757	NA	NA	GH20 glycoside hydrolases comprise both eukaryotic and prokaryotic enzymes. In addition to exo-acting β-N-acetylglucosaminidases, β-N-acetylgalactosamindase and β-6-SO3-N-acetylglucosaminidases, GH20 also contains exo-acting lacto-N-biosidases that cleave β-D-Gal-(1→3)-D-GlcNAc disaccharides from the non-reducing end of oligosaccharides. The best known members of GH20 are the human isoenzymes hex…
GH23	Glycoside hydrolase family 23	Lytic transglycosylases of GH23	1_1073	SMGJ01000007.1_74	SRHX01000008.1_69	The glycoside hydrolases of this family are lytic transglycosylases (also referred to as peptidoglycan lyases) of both bacterial and bacteriophage origin, and family G lysozymes (EC 3.2.1.17; muramidase, peptidoglycan N-acetylmuramoylhydrolase, 1,4-β-N-acetylmuramidase, N-acetylmuramoylhydrolase) of eukaryotic origin. Both of these enzymes are active on peptidoglycan, but only the lysozymes are a…
GH31	Glycoside hydrolase family 31	α-Glucosidases	1_1388	SMGJ01000010.1_48	SRHX01000008.1_180	CAZy Family GH31 is one of the two major families of glycoside hydrolases, along with GH13, that contain α-glucosidases. These enzymes play important roles in primary metabolism (e.g. human sucrase/isomaltase, a target for diabetic drugs such as miglitol), in catabolism (e.g. human lysosomal α-glucosidase) and in glycoprotein processing (e.g. ER glucosidase II). In addition to α-glucosidases, GH3…
GH32	Glycoside hydrolase family 32	Inverting sucrose; invertase	2_66	SMGJ01000006.1_72	SRHX01000001.1_90	Glycoside hydrolase family GH32 contains one of the earliest described enzyme activities, namely that of 'inverting' sucrose, from which is derived the name of 'invertase' (EC 3.2.1.26), discovered in the second half of the 19th century [1]. Besides the 'historical' invertases, this family also contains enzymes that hydrolyze fructose containing polysaccharides such as inulinases (EC 3.2.1.7) and…
GH33	Glycoside hydrolase family 33	Glycoside hydrolase family 33; no approved entry	1_1214	SMGJ01000001.1_240	SRHX01000001.1_250	No approved entry
GH42	Glycoside hydrolase family 42	Plant cell wall degradation	1_1367	NA	NA	Family GH42 enzymes have been identified only in unicellular organisms, mainly from prokaryotes (in majority bacteria), and with a few examples from archaea and fungi. GH42 enzymes are active on lactose and transgalactosylation was observed with production of galactooligosaccharides. However, several GH42 enzymes are extracted from diverse habitats where lactose would not be present and they are …
GH43	Glycoside hydrolase family 43	α-L-Arabinofuranosidase and β-D-xylosidase activity	1_1369	SMGJ01000001.1_262	SRHX01000001.1_262	The major activities reported for this family of glycoside hydrolases are α-L-arabinofuranosidases, endo-α-L-arabinanases (or endo-processive arabinanases) and β-D-xylosidases. An enzyme with exo α-1,3-galactanase has also been described. A significant number of enzymes in this family display both α-L-arabinofuranosidase and β-D-xylosidase activity using aryl-glycosides as substrates. It is likel…
GH77	Glycoside hydrolase family 77	α-Amylase	3_8	SMGJ01000002.1_49	SRHX01000007.1_76	Glycoside hydrolase family GH77 is a member of the α-amylase clan GH-H, together with GH13 and GH70. The family is monospecific with the 4-α-glucanotransferase (EC 2.4.1.25), that is known as disproportionating enzyme (D-enzyme) in plants or amylomaltase in bacteria and archaea. Around 2,000 members are known that originate mostly from bacteria. Only slightly above 1% of the family members have b…
GH102	Glycoside hydrolase family 102	Lytic transglycosylases	1_346	SMGJ01000002.1_362	SRHX01000003.1_44	As with other lytic transglycosylases (families GH23, GH103, and GH104), the GH102 enzymes are thought to possess a single catalytic general acid/base residue. This residue in E. coli MltA has been identified as Asp308 and, indeed, its replacement with Ala abolishes catalytic activity. The mechanism of action of the family GH102 enzymes has yet to be proven experimentally, but examination of crys…
GH103	Glycoside hydrolase family 103	Lytic transglycosylase B (MltB)	2_81	SMGJ01000006.1_87	SRHX01000006.1_102	The GH103 enzymes are thought to possess a single catalytic general acid/base residue. This residue has been identified as Glu162 in MltB from both E. coli and P. aeruginosa and, indeed, its replacement abolishes catalytic activity. The mechanism of action of family GH103 enzymes has been investigated the most compared to the lytic transglycosylases of the other families (GH23,GH102, and GH104).
CE4	Carbohydrate esterase family 4	Deacylation of polysaccharides	1_760	NA	NA	CE family 4 esterases catalyze the deacylation of polysaccharides. Known activities of CE family 4 members include acetylxylan esterases, chitin deacetylases, chitooligosaccharide deacetylases, and peptidoglycan deacetylases. Peptidoglycan, the essential bacterial cell wall polymer, consists of alternating β-(1,4) linked N-acetyl-D-glucosamine (GlcNAc) and N-acetyl-D-muramic acid (MurNAc). All bu…
CE9	Carbohydrate esterase family 9	Deacetylation of N-acetylglucosamine-6-phosphate	1_1583	SMGJ01000003.1_279	SRHX01000002.1_110	CE family 9 esterases catalyze the deacetylation of N-acetylglucosamine-6-phosphate to glucosamine-6-phosphate. This reaction has been demonstrated to be important for both amino sugar metabolism and peptidoglycan cell wall recycling in bacteria. Experimental substrate specificity profiles for two CE9 enzymes demonstrated that they are active on other structurally similar amino sugar phosphates, …
CE11	Carbohydrate esterase family 11	Carbohydrate esterase family 11; no approved entry	1_1738	SMGJ01000003.1_125	SRHX01000002.1_264	No approved entry
GT2	Glycosyltransferase family 2	Glycosyltransferase family 2; no approved entry	1_759	SMGJ01000006.1_85	SRHX01000006.1_104	A few families comprise a huge number of sequences from various sources with diverse functions. This is best illustrated with the family GT2 which contains more than 3500 sequences, originating from animal, plant, yeast, and bacterial species, and for which at least 12 distinct GT functions have already been characterized. The members of family 2 include cellulose synthase, chitin synthase, manno…
GT5	Glycosyltransferase family 5	Glycosyltransferase family 5; no approved entry	3_4	SMGJ01000002.1_45	SRHX01000007.1_80	No approved entry
GT9	Glycosyltransferase family 9	Glycosyltransferase family 9; no approved entry	1_999	SMGJ01000001.1_85	SRHX01000001.1_85	No approved entry
GT19	Glycosyltransferase family 19	Glycosyltransferase family 19; no approved entry	1_1807	SMGJ01000003.1_50	SRHX01000002.1_339	These enzymes belong to the glycosyltransferase family 19 GT19. Lipid-A-disaccharide synthetase 2.4.1.182 is involved with acyl-[acyl-carrier-protein]--UDP-N-acetylglucosamine O-acyltransferase 2.3.1.129 and tetraacyldisaccharide 4'-kinase 2.7.1.130 in the biosynthesis of the phosphorylated glycolipid, lipid A, in the outer membrane of Escherichia coli and other bacteria. These enzymes catalyse t…
GT28	Glycosyltransferase family 28	β-1,4-GlcNAc Transferase	1_1732	SMGJ01000003.1_131	SRHX01000002.1_258	Membrane-associated glycosyltransferase involved in peptidoglycan biosynthesis.
GT30	Glycosyltransferase family 30	Glycosyltransferase family 30; no approved entry	1_855	SMGJ01000010.1_17	SRHX01000010.1_17	No approved entry
GT35	Glycosyltransferase family 35	Glycogen and starch phosphorylase	1_1193	SMGJ01000002.1_44	SRHX01000007.1_81	Glycosyltransferase family 35 GT35 comprises enzymes with only one known activity; glycogen and starch phosphorylase (2.4.1.1).
GT41	Glycosyltransferase family 41	N-glycosyltransferase	1_943	SMGJ01000008.1_61	SRHX01000009.1_11	N-glycosyltransferase is an enzyme in prokaryotes which transfers individual hexoses onto asparagine sidechains in substrate proteins, using a nucleotide-bound intermediary, within the cytoplasm. They are distinct from regular N-glycosylating enzymes, which are oligosaccharyltransferases that transfer pre-assembled oligosaccharides. Both enzyme families however target a shared amino acid sequence…
GT51	Glycosyltransferase family 51	Murein polymerase	2_71	SMGJ01000004.1_77	SRHX01000004.1_77	There are two categories of enzymes in this family : monofunctional (just the GT51 module) or bifunctional (GT51 module attached to a penicillin-binding transpeptidase module). These enzymes utilise Und-PP-MurAc-(GlcNAc)-pentapeptide as the sugar donor.
